# Supplementary material
Source: PubMed Central journal article supplement (PMC5364455)
Supplement: oc6b00368_si_001.pdf [file oc6b00368_si_001.pdf]

## Supporting Information for

# Highly Enantioselective Oxidation of Non-activated Aliphatic C-H Bonds with Hydrogen Peroxide Catalyzed by Manganese Complexes

Michela Milan<sup>1</sup>, Massimo Bietti<sup>2\*</sup> and Miquel Costas<sup>1\*</sup>

<sup>1</sup> QBIS Research Group, Institut de Química Computacional i Catàlisi (IQCC) and Departament de Química, Universitat de Girona, Campus Montilivi, Girona E-17071, Catalunya, Spain.

<sup>2</sup> Dipartimento di Scienze e Tecnologie Chimiche, Università "Tor Vergata", Via della Ricerca Scientifica, 1 I-00133 Rome, Italy.

e-mail: [miquel.costas@udg.edu](mailto:miquel.costas@udg.edu)

[bietti@uniroma2.it](mailto:bietti@uniroma2.it)

## Contents

|                                                                                                  |           |
|--------------------------------------------------------------------------------------------------|-----------|
| <b>1. Experimental Section.....</b>                                                              | <b>2</b>  |
| <b>1.1 Materials.....</b>                                                                        | <b>2</b>  |
| <b>1.2 Instrumentation .....</b>                                                                 | <b>2</b>  |
| <b>2. Synthesis of the complexes .....</b>                                                       | <b>3</b>  |
| <b>2.1 Synthesis of the pyridine synthons .....</b>                                              | <b>3</b>  |
| <b>2.2 Synthesis of the ligands .....</b>                                                        | <b>4</b>  |
| <b>2.3 Synthesis of the complexes.....</b>                                                       | <b>7</b>  |
| <b>3. Synthesis of the substrates .....</b>                                                      | <b>12</b> |
| <b>4. Oxidation reactions .....</b>                                                              | <b>18</b> |
| <b>4.1 Reaction protocol for catalysis.....</b>                                                  | <b>18</b> |
| <b>4.2 General Procedure for product isolation .....</b>                                         | <b>20</b> |
| <b>5. Characterization of the isolated products .....</b>                                        | <b>20</b> |
| <b>A1 <sup>1</sup>H and <sup>13</sup>C{<sup>1</sup>H}NMR spectra of ligands .....</b>            | <b>28</b> |
| <b>A2 <sup>1</sup>H and <sup>13</sup>C{<sup>1</sup>H} NMR spectra of substrates .....</b>        | <b>35</b> |
| <b>A3 <sup>1</sup>H and <sup>13</sup>C{<sup>1</sup>H} NMR spectra of isolated products .....</b> | <b>48</b> |
| <b>A4 HPLC and GC spectra of products.....</b>                                                   | <b>69</b> |
| <b>References .....</b>                                                                          | <b>91</b> |

## **1. Experimental Section**

### **1.1 Materials**

Reagents and solvents used were of commercially available reagent quality unless stated otherwise. Solvents were purchased from SDS and Scharlab. Solvents were purified and dried by passing through an activated alumina purification system (M-Braun SPS-800) or by conventional distillation techniques.

### **1.2 Instrumentation**

Oxidation products were identified by comparison of their GC retention times and GC/MS with those of authentic compounds, and/or by  $^1\text{H}$  and  $^{13}\text{C}\{^1\text{H}\}$ -NMR analyses. IR spectra were taken in a Mattson-Galaxy Satellite FT-IR spectrophotometer using a MKII Golden Gate single reflection ATR system. Elemental analyses were performed using a CHNS-O EA-1108 elemental analyzer from Fisons. NMR spectra were taken on BrukerDPX300 and DPX400 spectrometers using standard conditions. Electrospray ionization mass spectrometry (ESI-MS) experiments were performed on a Bruker Daltonics Esquire 3000 Spectrometer using a 1 mM solution of the analyzed compound. High resolution mass spectra (HRMS) were recorded on a Bruker MicroTOF-Q IITM instrument with a ESI source at Serveis Tècnics of the University of Girona. Samples were introduced into the mass spectrometer ion source by direct infusion through a syringe pump and were externally calibrated using sodium formate. Chromatographic resolution of enantiomers was performed on an AgilentGC-7820-A chromatograph using a CYCLOSIL-B column and HPLC 1200 series Agilent technologies using CHIRALPAK-IA and CHIRALPAK-IC columns. The configuration of the major enantiomer was determined by chemical correlation.

## 2. Synthesis of the complexes

### 2.1 Synthesis of the pyridine synthons

Pyridine synthons <sup>TIPS</sup>PyCHO<sup>1</sup> and 5-(2,6-bis(trifluoromethyl)phenyl)-2-(chloromethyl)pyridine)<sup>2</sup> were synthesized following previously described procedure.

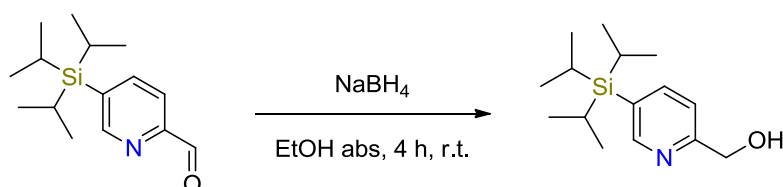

**<sup>TIPS</sup>PyCH<sub>2</sub>OH:** <sup>TIPS</sup>PyCHO (5 g, 19 mmol) was dissolved in absolute ethanol (45 ml) and NaBH<sub>4</sub> (2 eq., 38 mmol) was directly added as a solid in little portions. The reaction mixture was stirred for 4 hours at room temperature and then 10 ml of water were slowly added. After 10 minutes of stirring, the solvent was removed under reduced pressure and 10 ml of water were added. The mixture was extracted with 3 x 20 ml of CH<sub>2</sub>Cl<sub>2</sub>, the combined organic phases were dried with anhydrous MgSO<sub>4</sub> and the solvent was removed under reduced pressure to yield the desired product, (2.57 g, 9.68 mmol, 51% yield). <sup>1</sup>H-NMR (400 MHz, CDCl<sub>3</sub>, 300 K) δ, ppm 8.62 (dd, *J* = 1.7, 1.0 Hz, 1H), 7.78 (dd, *J* = 7.7, 1.8 Hz, 1H), 7.28 (dd, *J* = 7.7, 0.9 Hz, 1H), 4.78 (s, 2H), 1.42 (hept, *J* = 7.4 Hz, 3H), 1.08 (d, *J* = 7.5 Hz, 18H). <sup>13</sup>C{<sup>1</sup>H}-NMR 159.3, 154.1, 143.7, 128.3, 120.1, 64.2, 18.4, 10.9, 10.6. HRMS(ESI-MS) *m/z* calculated for C<sub>15</sub>H<sub>27</sub>NOSi[M+H]<sup>+</sup> 266.1935, found 266.1941.

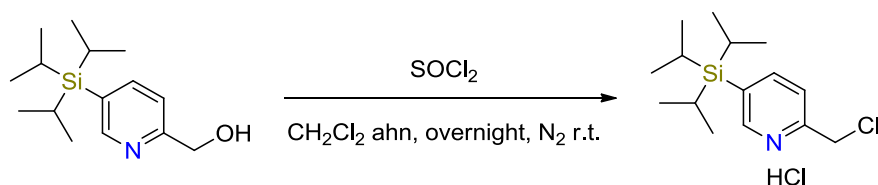

**<sup>TIPS</sup>PyCH<sub>2</sub>Cl·HCl:** <sup>TIPS</sup>PyCH<sub>2</sub>OH (2.50 g, 9.42 mmol) was dissolved in 167 ml of anhydrous CH<sub>2</sub>Cl<sub>2</sub> and a solution of SOCl<sub>2</sub> (5 equiv., 47.1 mmol) in anhydrous CH<sub>2</sub>Cl<sub>2</sub> (20 ml) was slowly added at 0°C under inert atmosphere. The reaction mixture was stirred overnight at room temperature and then the solvent was removed at reduced pressure to yield the desired product, (2.95 g, 9.2 mmol, 98% yield). <sup>1</sup>H-NMR (400 MHz, CDCl<sub>3</sub>, 300 K) δ, ppm 8.61 (s, 1H), 8.19 (d, *J* = 7.2 Hz, 1H), 7.82 (d, *J* = 7.5 Hz, 1H), 5.03 (s, 2H), 1.47 (hept, *J* = 7.4 Hz, 3H), 1.10 (d, *J* = 7.4 Hz, 18H). <sup>13</sup>C{<sup>1</sup>H}-NMR 152.6,

151.3, 144.6, 136.3, 126.2, 39.5, 18.3, 18.2, 18.1, 10.7, 10.4, 10.1. HRMS(ESI-MS)  $m/z$  calculated for  $C_{15}H_{26}NOSiCl[M+H]^+$  284.1596, found 284.1591.

## 2.2 Synthesis of the ligands

*N,N*-1,2-cyclohexanediamine derivatives were prepared according to the reported procedures.<sup>3</sup> <sup>TIPS</sup>mcp and <sup>TIPS</sup>pdp ligand was prepared according to the reported procedures.<sup>1</sup>

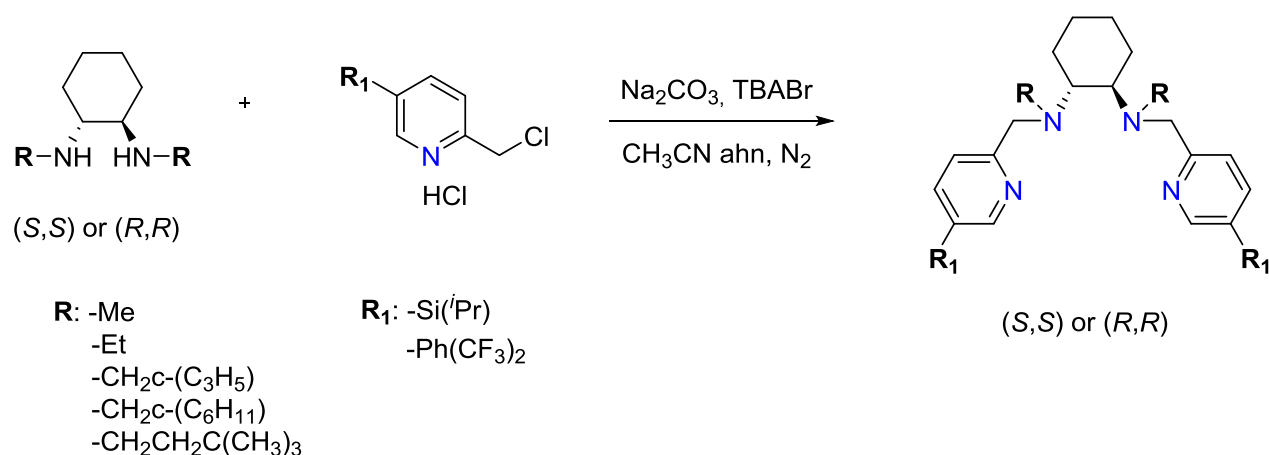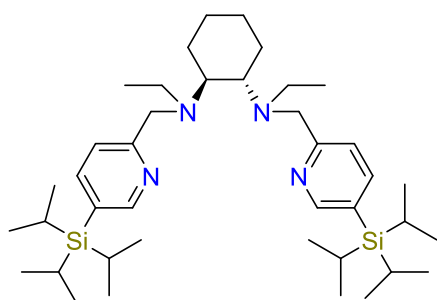

**(S,S)-<sup>TIPS</sup>ecp:** (S,S)-*N,N*-Diethyl-1,2-cyclohexanediamine (0.5 g, 2.9 mmol), <sup>TIPS</sup>PyCH<sub>2</sub>Cl·HCl (2.08 g, 6.5 mmol), Na<sub>2</sub>CO<sub>3</sub> (11 g, 104 mmol) and TBABr (10 mg) was dissolved in anhydrous CH<sub>3</sub>CN (100 ml). The reaction mixture was refluxed overnight under N<sub>2</sub>. At this point, the crude reaction was filtered and the solvent was evaporated under reduced pressure. NaOH (50 ml) was added and the organic layer was separated from the basic aqueous layer. The aqueous layer was extracted with CH<sub>2</sub>Cl<sub>2</sub> (3x) and the organic layer were combined and dried over Na<sub>2</sub>SO<sub>4</sub>. The obtained brown oil was purified by silica column (CH<sub>2</sub>Cl<sub>2</sub>:MeOH:NH<sub>3</sub> 95:4:1) and the collected fractions were removed under reduced pressure to provide 1.1 g (1.65 mmol, yield 57%) of a brown-yellow oil that turns solid after drying under vacuum. <sup>1</sup>H-NMR (400 MHz, CDCl<sub>3</sub>, 300 K)  $\delta$ , ppm: 8.45 (t,  $J$  = 1.3 Hz, 2H),

7.58 (d,  $J = 7.7$  Hz, 2H), 7.52 (dd,  $J = 7.8, 1.8$  Hz, 2H), 3.83 (d,  $J = 15.2$  Hz, 2H), 3.55 (d,  $J = 15.2$  Hz, 2H), 2.65 (d,  $J = 7.3$  Hz, 2H), 2.49 (ddt,  $J = 20.1, 12.8, 6.6$  Hz, 4H), 1.97 (d,  $J = 10.2$  Hz, 2H), 1.67 (m, 3H), 1.59 (m, 2H), 1.37-1.24 (m, 6H), 1.00 (dd,  $J = 7.5, 1.1$  Hz, 36H), 0.92 (t,  $J = 7.1$  Hz, 6H).  $^{13}\text{C}\{^1\text{H}\}$ -NMR 165.5, 154.1, 142.83, 142.75, 127.2, 126.7, 122.7, 122.6, 60.8, 56.4, 53.4, 44.1, 26.1, 25.9, 18.4, 14.3, 10.9, 10.6, 10.4. HRMS(ESI-MS)  $m/z$  calculated for  $\text{C}_{40}\text{H}_{72}\text{N}_4\text{Si}_2[\text{M}+\text{H}]^+$  665.5368, found 665.5366.

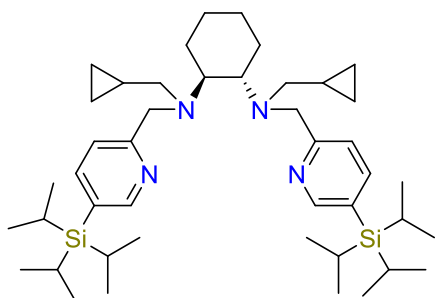

**(*S,S*)-<sup>TIPS</sup>cpcp:** Following the previous conditions, the crude mixture was purified by flash chromatography over silica using  $\text{CH}_2\text{Cl}_2:\text{MeOH}:\text{NH}_3$  96:3:1 and the product was concentrated to dryness. The product was isolated as a yellow oil (0.230 g, 61% yield).  $^1\text{H}$ -NMR (400 MHz,  $\text{CDCl}_3$ , 300 K)  $\delta$ , ppm: 8.49 (d,  $J = 1.6$  Hz, 2H), 7.76 (d,  $J = 7.8$  Hz, 2H), 7.58 (dd,  $J = 7.8, 1.8$  Hz, 2H), 4.05 (d,  $J = 15.1$  Hz, 2H), 3.59 (d,  $J = 15.1$  Hz, 2H), 2.95 (d,  $J = 7.3$  Hz, 2H), 2.63 (dd,  $J = 13.0, 5.4$  Hz, 2H), 2.24 (dd,  $J = 13.0, 7.5$  Hz, 2H), 2.06 (d,  $J = 10.4$  Hz, 2H), 1.75 (d,  $J = 10.4$  Hz, 2H), 1.36 (q,  $J = 7.4$  Hz, 6H), 1.18 (d,  $J = 11.8$  Hz, 4H), 1.05 (d,  $J = 7.8$  Hz, 36H), 0.76 (qd,  $J = 8.0, 6.7, 3.8$  Hz, 2H), 0.36 (tt,  $J = 8.8, 4.6$  Hz, 2H), 0.24 (tt,  $J = 8.9, 4.6$  Hz, 2H), 0.02 (dq,  $J = 9.5, 4.9$  Hz, 2H), 0.09 (dq,  $J = 9.5, 4.9$  Hz, 2H).  $^{13}\text{C}\{^1\text{H}\}$ -NMR 162.4, 154.1, 142.6, 126.6, 122.9, 61.2, 56.3, 55.6, 26.1, 25.5, 18.5, 10.6, 5.5, 2.8. HRMS(ESI-MS)  $m/z$  calculated for  $\text{C}_{44}\text{H}_{76}\text{N}_4\text{Si}_2[\text{M}+\text{H}]^+$  717.5681, found 717.5676.

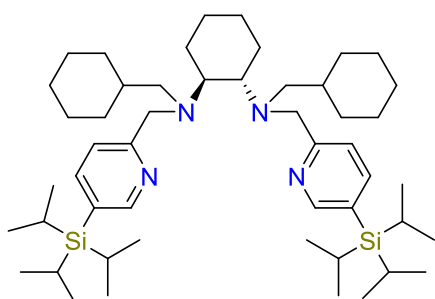

**(*S,S*)-<sup>TIPS</sup>chcp:** Following the previous conditions, the crude mixture was purified by flash chromatography over silica using  $\text{CH}_2\text{Cl}_2:\text{MeOH}:\text{NH}_3$  95:4:1 and the product was concentrated to dryness. The product was isolated as a yellow oil (0.130 g, 41% yield).  $^1\text{H}$ -NMR (400 MHz,  $\text{CDCl}_3$ ,

300 K)  $\delta$ , ppm: 8.53 (s, 2H), 7.67 (d,  $J = 1.5$  Hz, 4H), 4.03 (d,  $J = 15.2$  Hz, 2H), 3.63 (d,  $J = 15.2$  Hz, 2H), 2.85 – 2.72 (m, 2H), 2.42 (dd,  $J = 6.8, 3.2$  Hz, 4H), 2.14 – 2.05 (m, 2H), 1.76 (m, 4H), 1.65 – 1.48 (m, 8H), 1.40 (p,  $J = 7.5$  Hz, 6H), 1.34 – 1.21 (m, 6H), 1.08 (d,  $J = 7.4$  Hz, 36H), 1.04 – 0.95 (m, 6H), 0.66 (dtd,  $J = 23.5, 11.8, 8.6$  Hz, 4H).  $^{13}\text{C}\{^1\text{H}\}$ -NMR 162.4, 154.2, 142.7, 126.6, 122.6, 61.9, 58.9, 36.3, 32.14, 32.09, 26.7, 26.3, 26.2, 26.0, 18.4, 10.6. HRMS(ESI-MS)  $m/z$  calculated for  $\text{C}_{50}\text{H}_{88}\text{N}_4\text{Si}_2[\text{M}+\text{H}]^+$  801.6620, found 801.6605.

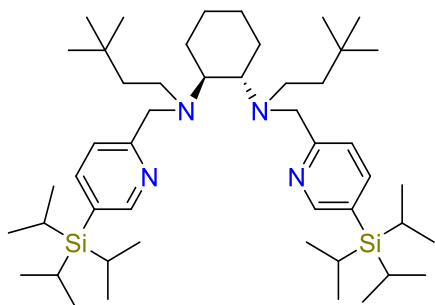

**(S,S)-<sup>TIPS</sup>tBucp:** Following the previous conditions, the crude mixture was purified by flash chromatography over silica using  $\text{CH}_2\text{Cl}_2:\text{MeOH}:\text{NH}_3$  95:4:1 and the product was concentrated to dryness. The product was isolated as a brown-yellow oil (0.170 g, 23% yield).  $^1\text{H}$ -NMR (400 MHz,  $\text{CDCl}_3$ , 300 K)  $\delta$ , ppm: 8.53 (s, 2H), 7.66 (d,  $J = 7.8$  Hz, 2H), 7.60 (dd,  $J = 7.8, 1.8$  Hz, 2H), 3.96 (d,  $J = 15.2$  Hz, 2H), 3.64 (d,  $J = 15.2$  Hz, 2H), 2.76 (d,  $J = 7.7$  Hz, 2H), 2.61 – 2.44 (m, 4H), 2.15 – 2.00 (m, 2H), 1.80 – 1.77 (m, 2H) 1.46 – 1.38 (m, 6H), 1.36 – 1.22 (m, 4H), 1.07 (d,  $J = 7.4$  Hz, 36H), 1.02 – 0.94 (m, 4H), 0.74 (s, 18H).  $^{13}\text{C}\{^1\text{H}\}$ -NMR 162.4, 154.1, 142.7, 126.7, 122.7, 61.3, 56.5, 46.8, 42.8, 29.8, 29.4, 26.3, 26.2, 18.4, 10.6. HRMS(ESI-MS)  $m/z$  calculated for  $\text{C}_{48}\text{H}_{88}\text{N}_4\text{Si}_2[\text{M}+\text{H}]^+$  777.6620, found 777.6603.

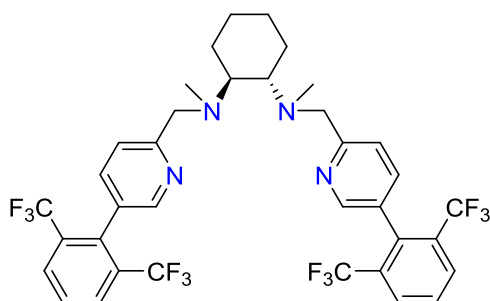

**(S,S)-<sup>CF3</sup>mcp:** Following the previous conditions, the crude mixture was purified by flash chromatography over silica using  $\text{CH}_2\text{Cl}_2:\text{MeOH}:\text{NH}_3$  97:2:1 and the product was concentrated to dryness. The product was isolated as a yellow oil (0.210 g, 44% yield).  $^1\text{H}$ -NMR (400 MHz,  $\text{CDCl}_3$ , 300 K)  $\delta$ , ppm: 8.39 (s, 2H), 7.99 (dd,  $J = 8.1, 3.7$  Hz, 4H), 7.68 (q,  $J = 7.9$  Hz, 4H), 7.55 – 7.45 (m,

2H), 4.04 (d,  $J = 14.5$  Hz, 2H), 3.87 (d,  $J = 14.5$  Hz, 2H), 2.70 (d,  $J = 9.1$  Hz, 2H), 2.35 (s, 6H), 2.05 (d,  $J = 12.3$  Hz, 2H), 1.81 (d,  $J = 8.6$  Hz, 2H), 1.41 – 1.27 (m, 2H), 1.20 (m, 2H).  $^{13}\text{C}\{^1\text{H}\}$ -NMR 161.6, 148.5, 137.6, 137.0, 131.9, 129.3, 128.5, 127.9, 124.4, 121.3, 64.3, 60.0, 36.8, 25.8, 25.4. HRMS(ESI-MS)  $m/z$  calculated for  $\text{C}_{36}\text{H}_{32}\text{F}_{12}\text{N}_4$   $[\text{M}+\text{H}]^+$  749.2508, found 749.2518.

### 2.3 Synthesis of the complexes

$[\text{Fe}(\text{CF}_3\text{SO}_3)_2(\text{mcp})]$ ,<sup>4</sup>  $[\text{Fe}(\text{CF}_3\text{SO}_3)_2(\text{pdp})]$ ,<sup>5</sup>  $[\text{Fe}(\text{CF}_3\text{SO}_3)_2(\text{TIPS}^{\text{mcp}})]$ ,<sup>1</sup>  $[\text{Fe}(\text{CF}_3\text{SO}_3)_2(\text{TIPS}^{\text{pdp}})]$ ,<sup>1</sup>  $[\text{Mn}(\text{CF}_3\text{SO}_3)_2(\text{mcp})]$ ,<sup>6</sup>  $[\text{Mn}(\text{CF}_3\text{SO}_3)_2(\text{pdp})]$ ,<sup>7</sup>  $[\text{Mn}(\text{CF}_3\text{SO}_3)_2(\text{d}^{\text{MM}}\text{mcp})]$ ,<sup>8</sup>  $[\text{Mn}(\text{CF}_3\text{SO}_3)_2(\text{Me}_2\text{N}^{\text{pdp}})]$ <sup>8</sup> and  $[\text{Mn}(\text{CF}_3\text{SO}_3)_2(\text{BzIm}^{\text{pdp}})]$ <sup>9</sup> complexes were prepared according to the reported procedures.

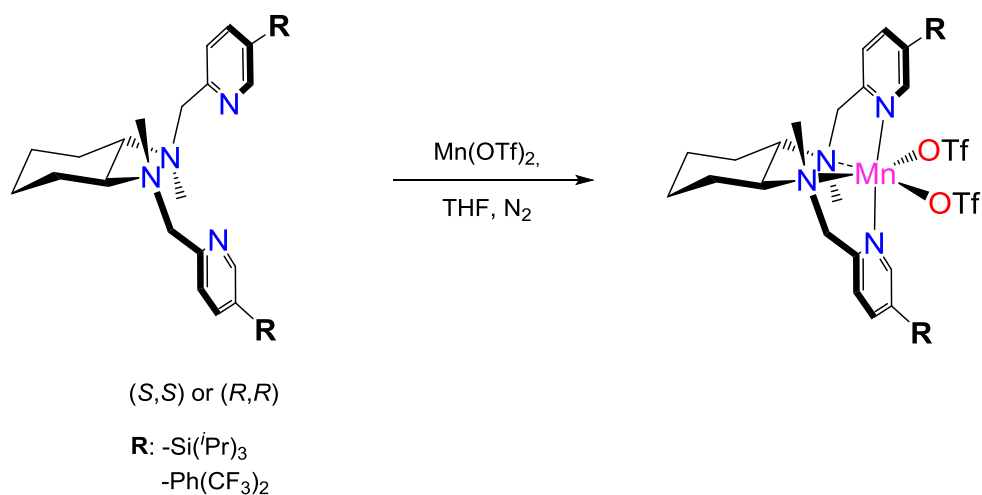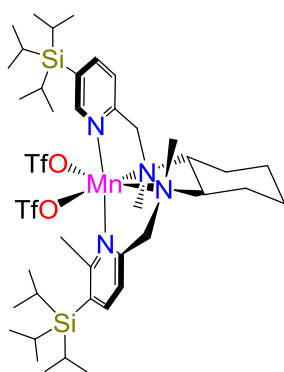

**(*R,R*)-[Mn(CF<sub>3</sub>SO<sub>3</sub>)<sub>2</sub>(TIPS<sup>mcp</sup>)]:** Under N<sub>2</sub> atmosphere, a suspension of Mn(CF<sub>3</sub>SO<sub>3</sub>)<sub>2</sub> (83.1 mg, 0.24 mmol) in anhydrous THF (1 mL) was added drop-wise to a vigorously stirred solution of (*R,R*)-TIPS<sup>mcp</sup> (150 mg, 0.24 mmol) in THF (1 mL). After a few seconds the solution became cloudy and a white precipitate appeared. After stirring for 4 hours the solution was filtered off and the resultant white solid dried under vacuum. This solid was dissolved in



CH<sub>2</sub>Cl<sub>2</sub> (3 mL) and the solution filtered off through Celite®. Slow diethyl ether diffusion over the resultant solution afforded, in a few days, white crystals (158 mg, 0.16 mmol, 67% yield). Anal. Calcd for C<sub>40</sub>H<sub>68</sub>F<sub>6</sub>MnN<sub>4</sub>O<sub>6</sub>S<sub>2</sub>Si<sub>2</sub>: C, 48.52; H, 6.92; N, 5.66 Found: C, 48.65; H, 6.95; N, 5.76 %. FT-IR (ATR)  $\nu$ , cm<sup>-1</sup>: 2943 – 2866 (C-H)sp<sup>3</sup>, 1592, 1459, 1311, 1233, 1211, 1164, 1026, 882, 701, 635, 567, 514. ESI-HRMS calcd. for C<sub>38</sub>H<sub>68</sub>N<sub>4</sub>Si<sub>2</sub>MnCF<sub>3</sub>SO<sub>3</sub> [M-OTf]<sup>+</sup>: 840.3878, found: 840.3888.

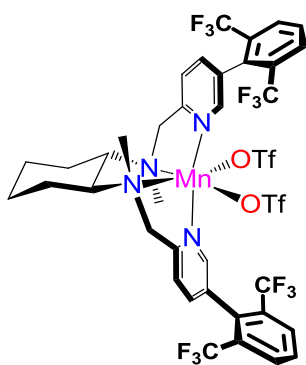

**(S,S)-[Mn(CF<sub>3</sub>SO<sub>3</sub>)<sub>2</sub>(<sup>CF3</sup>mcp)]**: Following the previous conditions, white

crystals were obtained after slow diethyl ether diffusion in CH<sub>2</sub>Cl<sub>2</sub>. (286 mg, 0.26 mmol, 68% yield). Anal. Calcd for C<sub>38</sub>H<sub>32</sub>F<sub>18</sub>MnN<sub>4</sub>O<sub>6</sub>S<sub>2</sub>: C, 41.43 H, 2.93; N, 5.09 Found: C, 41.20; H, 2.91; N, 4.84 %. FT-IR (ATR)  $\nu$ , cm<sup>-1</sup>: 3458 – 2945 (C-H)sp<sup>3</sup>, 1612, 1459, 1293, 1127, 1067, 1030, 822, 761, 677, 635, 513. ESI-HRMS calcd. for C<sub>36</sub>H<sub>32</sub>N<sub>4</sub>F<sub>12</sub>MnCF<sub>3</sub>SO<sub>3</sub> [M-OTf]<sup>+</sup>: 952.1331, found: 952.1346.

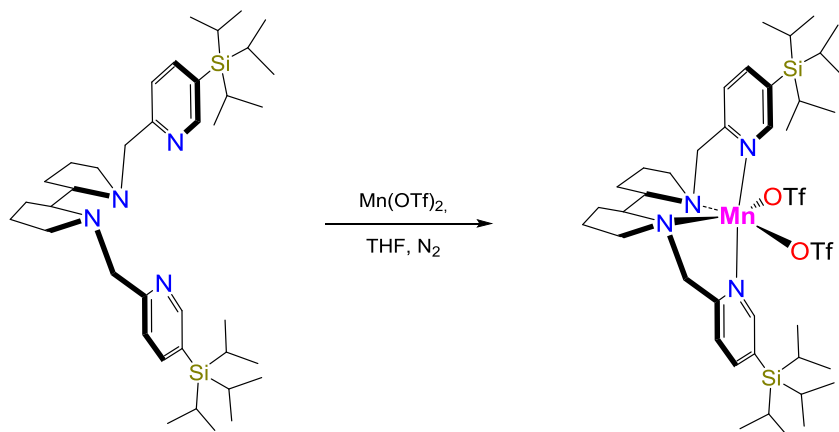

**(S,S)-[Mn(CF<sub>3</sub>SO<sub>3</sub>)<sub>2</sub>(<sup>TIPS</sup>pdp)]**: Under N<sub>2</sub> atmosphere, a suspension of Mn(CF<sub>3</sub>SO<sub>3</sub>)<sub>2</sub> (86.5 mg, 0.25 mmol) in anhydrous THF (1 mL) was added drop-wise to a vigorously stirred solution of (S,S)-<sup>TIPS</sup>pdp (159 mg, 0.25 mmol) in THF (1 mL). After a few seconds the solution became cloudy and a white precipitate appeared. After stirring for 4 hours the solution was filtered off and the resultant white solid dried under vacuum. This solid was dissolved in CH<sub>2</sub>Cl<sub>2</sub> (3 mL) and the solution filtered off through Celite®. Slow diethyl ether diffusion over the resultant solution afforded, in a few days, white crystals (155 mg, 0.16 mmol, 64% yield). Anal. Calcd for C<sub>40</sub>H<sub>66</sub>F<sub>6</sub>MnN<sub>4</sub>O<sub>6</sub>S<sub>2</sub>Si<sub>2</sub>: C, 48.62;

H, 6.73; N, 5.67 Found: C, 48.83; H, 7.05; N, 5.81 %. FT-IR (ATR)  $\nu$ ,  $\text{cm}^{-1}$ : 2944 – 2866 (C-H) $\text{sp}^3$ , 1593, 1463, 1307, 1229, 1030, 983, 882, 760, 682, 636, 514. ESI-HRMS calcd. for  $\text{C}_{38}\text{H}_{66}\text{N}_4\text{Si}_2\text{MnCF}_3\text{SO}_3$  [M-OTf] $^+$ : 838.3721, found: 838.3723.

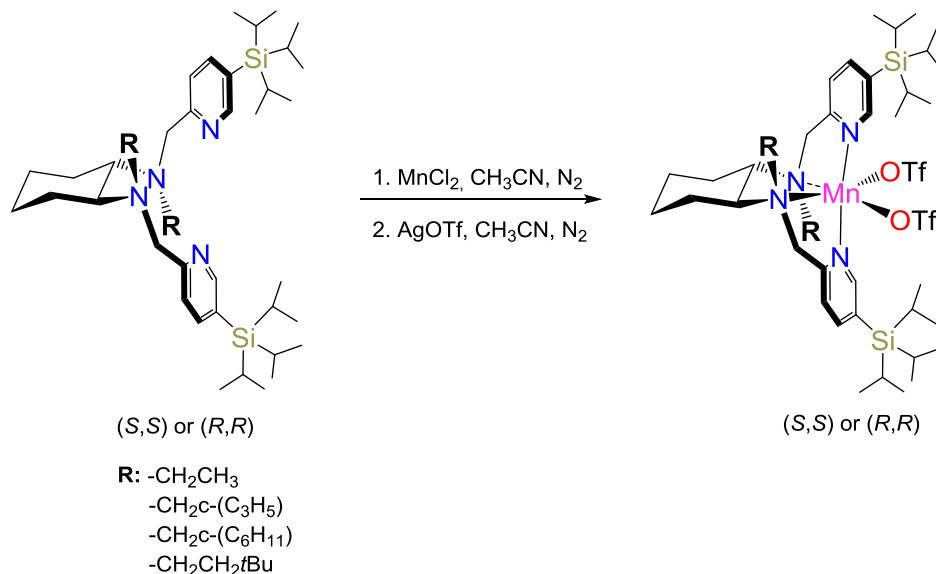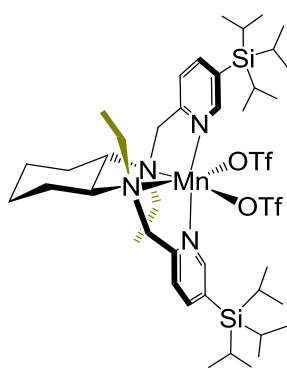

**(*S,S*)-[Mn(CF<sub>3</sub>SO<sub>3</sub>)<sub>2</sub>(<sup>TIPS</sup>ecp)]:** Under N<sub>2</sub> atmosphere, a suspension of MnCl<sub>2</sub>

(30.5 mg, 0.24 mmol) in anhydrous CH<sub>3</sub>CN (1 mL) was added drop-wise to a vigorously stirred solution of (*S,S*)-<sup>TIPS</sup>ecp (161 mg, 0.24 mmol) in CH<sub>3</sub>CN (1 mL). After 4 hours 2 equiv. of AgCF<sub>3</sub>SO<sub>3</sub> (123.3 mg, 0.48 mmol) were added to the solution. After 2 hours, the reaction mixture was filtered through Celite© and dried under vacuum. The solid was crystallized by layering CH<sub>2</sub>Cl<sub>2</sub> solution of the complex with hexane to yield the desired white/brown complex (163 mg, 0.16 mmol, 68% yield). Anal. Calcd for C<sub>42</sub>H<sub>72</sub>F<sub>6</sub>MnN<sub>4</sub>O<sub>6</sub>S<sub>2</sub>Si<sub>2</sub>: C, 49.54; H, 7.13; N, 5.5 %. Found: C, 49.71; H, 7.35; N, 5.80 %. FT-IR (ATR)  $\nu$ ,  $\text{cm}^{-1}$ : 2944 – 2866 (C-H) $\text{sp}^3$ , 1592, 1462, 1309, 1211, 1163, 1111, 1028, 882, 683, 636, 568, 514. ESI-HRMS calcd. for C<sub>40</sub>H<sub>72</sub>N<sub>4</sub>Si<sub>2</sub>MnCF<sub>3</sub>SO<sub>3</sub> [M-OTf] $^+$ : 868.4191, found: 868.4200.

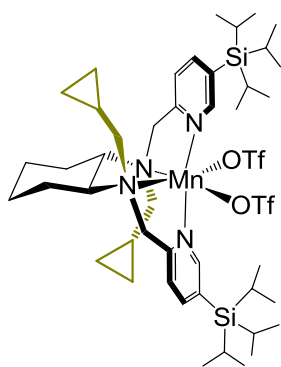

**(S,S)-[Mn(CF<sub>3</sub>SO<sub>3</sub>)<sub>2</sub>(TIPScpcp)]**: Following the previous conditions, white

crystals were obtained by layering CH<sub>2</sub>Cl<sub>2</sub> solution of the complex with hexane. (153 mg, 0.14 mmol, 48% yield). Anal. Calcd for C<sub>46</sub>H<sub>76</sub>F<sub>6</sub>MnN<sub>4</sub>O<sub>6</sub>S<sub>2</sub>Si<sub>2</sub>: C, 51.62; H, 7.16; N, 5.23 %. Found: C, 51.32; H, 7.06; N, 5.29 %. FT-IR (ATR)  $\nu$ , cm<sup>-1</sup>: 2944 – 2866 (C-H)<sub>sp<sup>3</sup></sub>, 1592, 1462, 1311, 1233, 1210, 1163, 1025, 882, 704, 682, 634, 569, 513. ESI-HRMS calcd. for C<sub>44</sub>H<sub>76</sub>N<sub>4</sub>Si<sub>2</sub>MnCF<sub>3</sub>SO<sub>3</sub> [M-OTf]<sup>+</sup>: 920.4504, found: 920.4482.

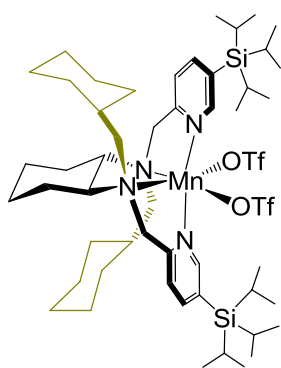

**(S,S)-[Mn(CF<sub>3</sub>SO<sub>3</sub>)<sub>2</sub>(TIPSchcp)]**: Following the previous conditions, white

crystals were obtained by layering CH<sub>2</sub>Cl<sub>2</sub> solution of the complex with hexane. (127 mg, 0.11 mmol, 51% yield). Anal. Calcd for C<sub>52</sub>H<sub>88</sub>F<sub>6</sub>MnN<sub>4</sub>O<sub>6</sub>S<sub>2</sub>Si<sub>2</sub>: C, 54.10; H, 7.68; N, 4.85 %. Found: C, 49.71; H, 7.50; N, 4.98 %. FT-IR (ATR)  $\nu$ , cm<sup>-1</sup>: 2944 – 2866 (C-H)<sub>sp<sup>3</sup></sub>, 1592, 1462, 1311, 1233, 1210, 1163, 1025, 882, 704, 682, 634, 569, 513. ESI-HRMS calcd. for C<sub>50</sub>H<sub>88</sub>N<sub>4</sub>Si<sub>2</sub>MnCF<sub>3</sub>SO<sub>3</sub> [M-OTf]<sup>+</sup>: 1004.5443, found: 1004.5470.

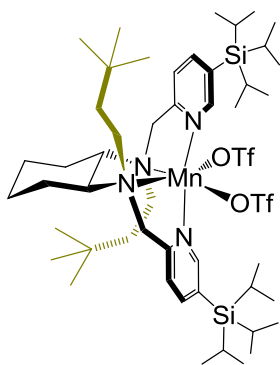

**(S,S)-[Mn(CF<sub>3</sub>SO<sub>3</sub>)<sub>2</sub>](<sup>TIPS</sup>tBucp)]:** Following the previous conditions, white/brown crystals were obtained by layering CH<sub>2</sub>Cl<sub>2</sub> solution of the complex with hexane. (98 mg, 0.087 mmol, 41% yiel). Anal. Calcd for C<sub>50</sub>H<sub>88</sub>F<sub>6</sub>MnN<sub>4</sub>O<sub>6</sub>S<sub>2</sub>Si<sub>2</sub>: C, 53.12; H, 7.85; N, 4.96 %. Found: C, 53.50; H, 8.05; N, 4.91 %. FT-IR (ATR)  $\nu$ , cm<sup>-1</sup>: 2944 – 2866 (C-H)<sub>sp<sup>3</sup></sub>, 1592, 1463, 1311, 1209, 1165, 1025, 881, 682, 635, 569, 514. ESI-HRMS calcd. for C<sub>49</sub>H<sub>88</sub>N<sub>4</sub>Si<sub>2</sub>MnCF<sub>3</sub>SO<sub>3</sub> [M-OTf]<sup>+</sup>: 980.5448, found: 980.5451.

### 3. Synthesis of the substrates

The following substrates were prepared according to the reported procedures. All the remaining ones are commercially available.

S2<sup>10</sup>

S3<sup>11</sup>

S8, S9, S10, S11, S12, S13, S15<sup>12</sup>

S18<sup>13</sup>

S19<sup>14</sup>

S20, S21, S22<sup>15</sup>

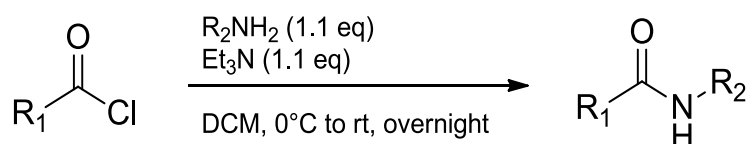

A round-bottom flask equipped with a septum and kept under nitrogen was charged with a 0.20 M solution of the amine (1.1 equiv) in dichloromethane and cooled to 0 °C. Triethylamine (1.1 equiv) was added to the reaction flask. The acyl chloride (1.0 equiv) was added dropwise and the reaction was stirred overnight at room temperature. At this point, a saturated aqueous Na<sub>2</sub>CO<sub>3</sub> solution was added until pH~10-11 and then diluted with dichloromethane. The organic layer was separated from the basic aqueous layer. The aqueous layer was extracted with dichloromethane (2x) and the organic layers were combined. The organic layer was washed with 1N HCl and dried over anhydrous sodium sulfate (Na<sub>2</sub>SO<sub>4</sub>). The organic layer was evaporated to dryness and the crude amine was purified by flash chromatography over silica gel.

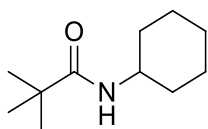

**N-Cyclohexylpivalamide (S8):** Following the general conditions, the crude mixture was purified by flash chromatography over silica using hexane:ethyl acetate 1:1 and the product was concentrated to dryness. The product was isolated as a white solid (0.38 g, 79% yield).

<sup>1</sup>H-NMR (CDCl<sub>3</sub>, 400 MHz, 300K) δ, ppm: 5.46 (bs, 1H), 3.75 - 3.73 (m, 1H), 1.92 - 1.86 (m, 2H), 1.73 - 1.57 (m, 3H), 1.44 - 1.30 (m, 3H), 1.18 (s, 9H), 1.14 - 1.04 (m, 2H). <sup>13</sup>C-NMR 177.4, 47.9, 38.5, 33.1, 27.6, 25.6, 24.9 HRMS(ESI+) *m/z* calculated for C<sub>11</sub>H<sub>21</sub>NO [M+Na]<sup>+</sup> 206.1515, found 206.1512.

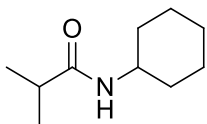

**N-Cyclohexylisobutyramide (S9):** Following the general conditions, the crude mixture was purified by flash chromatography over silica using hexane:ethyl acetate 1:1 and the product was concentrated to dryness. The product was isolated as a white solid (0.43 g, 83% yield).

$^1\text{H-NMR}$  ( $\text{CDCl}_3$ , 400 MHz, 300K)  $\delta$ , ppm: 5.34 (bs, 1H), 3.82 - 3.70 (m, 1H), 2.35 - 2.28 (q, 1H), 1.94 - 1.88 (m, 2H), 1.74 - 1.60 (m, 3H), 1.43 - 1.31 (m, 2H), 1.23 - 1.21 (m, 1H), 1.15 (d, 6H), 1.10 - 1.0 (m, 2H).  $^{13}\text{C-NMR}$  176.0, 47.8, 35.8, 33.2, 25.6, 24.9, 19.7. HRMS(ESI+)  $m/z$  calculated for  $\text{C}_{10}\text{H}_{19}\text{NO}$   $[\text{M}+\text{Na}]^+$  192.1359, found 192.1358.

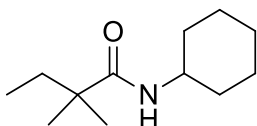

**N-(cyclohexyl)-2,2-dimethylbutanamide (S10):** Following the general conditions, the crude mixture was purified by flash chromatography over silica using hexane:ethyl acetate 1:1 and the product was concentrated to dryness. The product was isolated as a white solid (0.56 g, 97% yield).  $^1\text{H-NMR}$  ( $\text{CDCl}_3$ , 400 MHz, 300K)  $\delta$ , ppm: 5.45 (bs, 1H), 3.86 - 3.66 (m, 1H), 1.96 - 1.80 (m, 2H), 1.75 - 1.55 (m, 4H), 1.51 (q,  $J = 7.5$  Hz, 2H), 1.44 - 1.27 (m, 2H), 1.22 - 1.14 (m, 1H), 1.12 (s, 6H), 1.10 - 1.02 (m, 1H), 0.82 (t,  $J = 7.5$  Hz, 3H).  $^{13}\text{C-NMR}$  176.6, 47.9, 42.1, 33.9, 33.2, 25.6, 25.0, 24.9, 9.1. HRMS(ESI+)  $m/z$  calculated for  $\text{C}_{12}\text{H}_{23}\text{NO}$   $[\text{M}+\text{Na}]^+$  220.1672, found 220.1673.

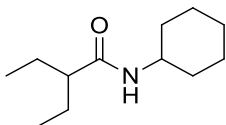

**N-(cyclohexyl)-2-ethylbutanamide (S11):** Following the general conditions, the crude mixture was purified by flash chromatography over silica using hexane:ethyl acetate 1:1 and the product was concentrated to dryness. The product was isolated as a white solid (0.65 g, 84% yield).  $^1\text{H-NMR}$  ( $\text{CDCl}_3$ , 400 MHz, 300K)  $\delta$ , ppm: 5.62 (bs, 1H), 3.78 (tdt,  $J = 10.7, 8.1, 3.9$  Hz, 1H), 1.87 (dd,  $J = 12.5, 3.8$  Hz, 2H), 1.79 (tt,  $J = 9.3, 5.1$  Hz, 1H), 1.67 (dt,  $J = 13.2, 3.6$  Hz, 2H), 1.62 - 1.50 (m, 3H), 1.46 - 1.26 (m, 4H), 1.18 - 1.05 (m, 3H), 0.88 - 0.80 (t,  $J = 7.4$  Hz, 6H).  $^{13}\text{C-NMR}$  174.6, 51.4, 47.8, 33.3, 25.8, 25.5, 24.9, 12.0. HRMS(ESI+)  $m/z$  calculated for  $\text{C}_{12}\text{H}_{23}\text{NO}$   $[\text{M}+\text{Na}]^+$  220.1672, found 220.1673.

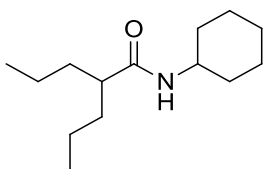

**N-(cyclohexyl)-2-propylbutanamide (S12):** Following the general conditions, the crude mixture was purified by flash chromatography over silica using hexane:ethyl acetate 1:1 and the product was concentrated to dryness. The product was isolated as a white solid (0.53 g, 80% yield).  $^1\text{H-NMR}$  ( $\text{CDCl}_3$ , 400 MHz, 300K)  $\delta$ , ppm: 5.39 (bs, 1H), 3.90 – 3.70, (m, 1H), 2.04 – 1.81 (m, 3H), 1.76 – 1.51 (m, 5H), 1.45 – 1.19 (m, 8H), 1.12 (ddd,  $J = 23.0, 12.1, 3.4$  Hz, 3H), 0.88 (t,  $J = 7.1$  Hz, 6H).  $^{13}\text{C-NMR}$  174.9, 47.9, 47.8, 35.4, 33.4, 25.6, 24.9, 20.8, 14.1 HRMS(ESI+)  $m/z$  calculated for  $\text{C}_{14}\text{H}_{27}\text{NO}$  [ $\text{M}+\text{Na}$ ] $^+$  248.1985, found 248.1981.

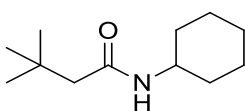

**N-(cyclohexyl)-3,3-dimethylbutanamide (S13):** Following the general conditions, the crude mixture was purified by flash chromatography over silica using hexane:ethyl acetate 1:1 and the product was concentrated to dryness. The product was isolated as a white solid (0.75 g, 85% yield).  $^1\text{H-NMR}$  ( $\text{CDCl}_3$ , 400 MHz, 300K)  $\delta$ , ppm: 5.26 (bs, 1H), 3.84 - 3.77 (m, 1H), 2.02 (s, 2H), 1.99 - 1.86 (m, 2H), 1.77 - 1.55 (m, 3H), 1.47 - 1.28 (m, 2H), 1.25 – 1.07 (m, 3H), 1.04 (s, 9H).  $^{13}\text{C-NMR}$  170.6, 50.9, 48.0, 33.3, 30.8, 29.8, 25.6, 24.9 HRMS(ESI+)  $m/z$  calculated for  $\text{C}_{12}\text{H}_{23}\text{NO}$  [ $\text{M}+\text{Na}$ ] $^+$  220.1672, found 220.1667.

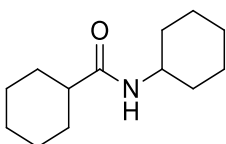

**N-Cyclohexylcyclohexanecarboxamide (S15):** Following the general conditions, the crude mixture was purified by flash chromatography over silica using hexane:ethyl acetate 1:1 and the product was concentrated to dryness. The product was isolated as a white solid (0.32 g, 53% yield).  $^1\text{H-NMR}$  ( $\text{CDCl}_3$ , 400 MHz, 300K)  $\delta$ , ppm: 5.34 (bs, 1H), 3.85 - 3.64 (m, 1H), 2.02 (tt,  $J = 11.7, 3.4$  Hz, 1H), 1.93 - 1.58 (m, 10H), 1.47 - 1.03 (m, 10H).  $^{13}\text{C-NMR}$  175.1, 47.7, 45.7, 33.3, 30.9, 29.7, 26.5, 25.8, 24.9 HRMS(ESI+)  $m/z$  calculated for  $\text{C}_{13}\text{H}_{23}\text{NO}$  [ $\text{M}+\text{Na}$ ] $^+$  232.1672, found 232.1678.

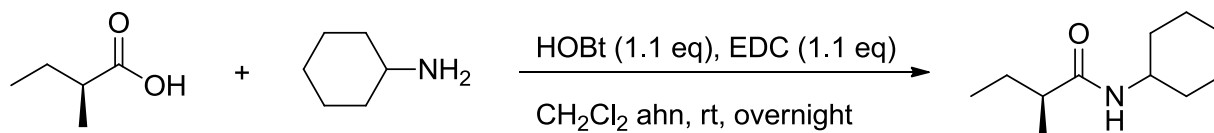

***N*-(cyclohexyl)-(S)-(+)-2-methylbutanamide (S14):** Following the traditional methodology used for peptide synthesis, the product was isolated as a white solid (0.85 g, 85% yield).

$^1\text{H-NMR}$  ( $\text{CDCl}_3$ , 400 MHz, 300K)  $\delta$ , ppm: 5.41 (bs, 1H), 3.79 (tdt,  $J = 12.2, 8.1, 3.9$  Hz, 1H), 2.02 (dq,  $J = 13.5, 6.8$  Hz, 1H), 1.92-1.88 (m, 2H), 1.73 - 1.56 (m, 4H), 1.49 - 1.28 (m, 4H), 1.21-1.17 (m, 2H), 1.12 (dd,  $J = 12.4, 7.9$  Hz, 3H), 0.89 (t,  $J = 7.4$  Hz, 3H).  $^{13}\text{C-NMR}$  175.4, 47.8, 43.3, 33.4, 27.4, 25.6, 24.9, 17.6, 11.9. HRMS(ESI+)  $m/z$  calculated for  $\text{C}_{11}\text{H}_{21}\text{NO}$   $[\text{M}+\text{Na}]^+$  206.1515, found 206.1517.

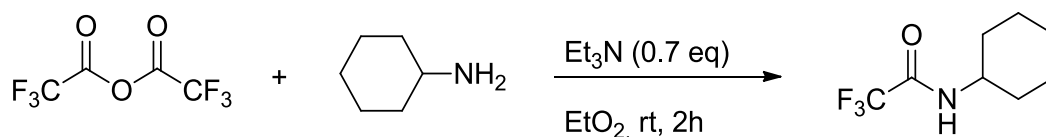

***N*-Cyclohexyltrifluoroacetamide (S17):** A round-bottom flask equipped with a septum and kept under nitrogen was charged with cyclohexylamine (1.0 equiv, 0.24 g, 2.4 mmol) and solubilized in diethylether (1.4 M). Triethylamine (0.7 equiv) was added to the reaction flask. Trifluoroacetic anhydride (1.0 equiv, 0.5 g, 2.4 mmol) in diethylether (1.4 M) was added dropwise and the reaction was stirred for 2 hours at room temperature. At this point  $\text{H}_2\text{O}$  was added and the basic aqueous layer was separated. The organic layer was extracted with  $\text{NaHCO}_3$ , saturated with  $\text{NH}_4\text{Cl}$  and dried over anhydrous sodium sulfate ( $\text{Na}_2\text{SO}_4$ ). The organic layer was evaporated to dryness and the crude amine was purified by flash chromatography over silica gel using hexane:ethyl acetate 1:1 and the product was concentrated to dryness. The product was isolated as a white solid (0.25 g, 1.3 mmol 54% yield).  $^1\text{H-NMR}$  ( $\text{CDCl}_3$ , 400 MHz, 300K)  $\delta$ , ppm: 6.24 (bs, 1H), 3.94 - 3.69 (m, 1H), 2.08 - 1.88 (m, 2H), 1.87 - 1.59 (m, 3H), 1.52 - 1.08 (m, 5H).  $^{13}\text{C-NMR}$  156.5, 117.8, 113.9, 100.0, 49.2, 32.4, 25.2, 24.6 HRMS(ESI+)  $m/z$  calculated for  $\text{C}_8\text{H}_{12}\text{F}_3\text{NO}$   $[\text{M}+\text{Na}]^+$  218.0763, found 218.0762.



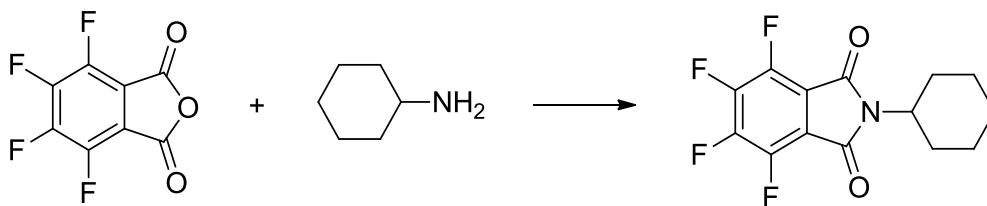

**N-Cyclohexyltetrafluorophthalimide (S19):** Tetrafluorophthalic anhydride (0.5 g, 2.3 mmol, 1.2 eq.) was added to a solution of cyclohexylamine (0.19 g, 1.9 mmol, 1.0 eq.) in glacial acetic acid and refluxed overnight. The solvent was removed under reduced pressure and the reaction mixture was refluxed in acetic anhydride for 12 h. The solvent was evaporated and the crude amide was purified by flash chromatography over silica gel with hexane:ethyl acetate 3:1 and the product was concentrated to dryness. The product was isolated as a yellow solid (0.24 g, 82% yield).  $^1\text{H-NMR}$  ( $\text{CDCl}_3$ , 400 MHz, 300K)  $\delta$ , ppm: 4.08 (t,  $J = 12.4$  Hz, 1H), 2.26 – 2.06 (m, 2H), 1.87 (d,  $J = 13.0$  Hz, 2H), 1.70 (d,  $J = 12.0$  Hz, 3H), 1.47 – 1.13 (m, 3H).  $^{13}\text{C-NMR}$  162.5, 146.2, 144.5, 143.5, 141.9, 113.8, 51.9, 29.6, 25.9, 24.9. HRMS(ESI+)  $m/z$  calculated for  $\text{C}_{14}\text{H}_{11}\text{F}_4\text{NO}_2(\text{CH}_3\text{OH})$   $[\text{M}+\text{Na}]^+$  356.0880, found 356.0885.

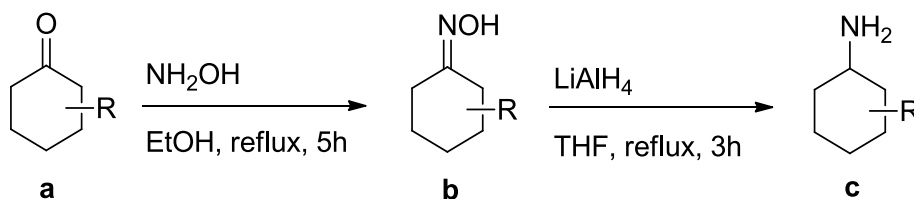

Hydroxylamine hydrochloride (1.2 equiv) followed by pyridine (3.0 equiv) was added to a solution of ketone (**a**) (1.0 equiv) in absolute ethanol and the reaction mixture was heated to reflux temperature under stirring for 5 hours. The reaction was then quenched with water and the product extracted with ethyl acetate (2 x 50 mL). The organic fractions were washed with water and dried over anhydrous  $\text{MgSO}_4$ . The solvent was removed under vacuum to obtain the oxime (**b**) that was used in the next step without further purification. To a stirred solution of lithium aluminium hydride (0.5 equiv) in anhydrous THF under  $\text{N}_2$ , was added a solution of intermediate **b** drop wise. The reaction was slowly heated to reflux temperature for 3 hours. After this, the reaction mixture was quenched with 1M NaOH solution at  $5^\circ\text{C}$ . After filtration through Celite® and extraction with ethyl acetate (2 x 50 mL) the organic fractions were dried over anhydrous  $\text{MgSO}_4$ , the solvent removed under vacuum and the obtained intermediate **c** was used in the next acylation step without further purification to give the corresponding amide.

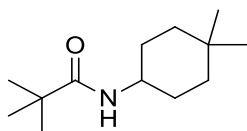

**N-(4,4-dimethylcyclohexyl)pivalamide (S20):** Following the general conditions, the crude mixture was purified by flash chromatography over silica using hexane:ethyl acetate 1:1 and the product was concentrated to dryness. The product was isolated as a white solid (0.39 g, 94% yield).  $^1\text{H-NMR}$  ( $\text{CDCl}_3$ , 400 MHz, 300K)  $\delta$ , ppm: 5.49 (s, 1H), 3.68 (tt,  $J = 9.2, 4.8$  Hz, 1H), 1.75-1.72 (m, 2H), 1.38 – 1.17 (m, 6H), 1.17 (s, 9H), 0.91 (s, 6H).  $^{13}\text{C-NMR}$  177.6, 48.1, 38.5, 37.6, 31.5, 29.5, 28.7, 27.6, 25.1. HRMS(ESI+)  $m/z$  calculated for  $\text{C}_{13}\text{H}_{25}\text{NO}$   $[\text{M}+\text{Na}]^+$  234.1828, found 234.1822.

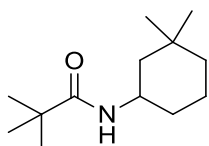

**N-(3,3-dimethylcyclohexyl)pivalamide (S21):** Following the general conditions, the crude mixture was purified by flash chromatography over silica using hexane:ethyl acetate 1:1 and the product was concentrated to dryness. The product was isolated as a white solid (0.38 g, 70% yield).  $^1\text{H-NMR}$  ( $\text{CDCl}_3$ , 400 MHz, 300K)  $\delta$ , ppm: 5.32 (d,  $J = 7.0$  Hz, 1H), 3.88 (tdt,  $J = 12.0, 8.0, 4.1$  Hz, 1H), 1.95 – 1.92 (m, 1H), 1.64 – 1.46 (m, 4H), 1.35 – 1.31 (m, 1H), 1.15 (s, 9H), 1.09 – 0.99 (m, 2H), 0.94 (s, 3H), 0.91 (s, 3H), 0.88-0.84 (m, 1H).  $^{13}\text{C-NMR}$  177.5, 46.0, 45.2, 38.53, 38.46, 33.3, 33.0, 31.7, 27.6, 24.7, 21.3. HRMS(ESI+)  $m/z$  calculated for  $\text{C}_{13}\text{H}_{25}\text{NO}$   $[\text{M}+\text{Na}]^+$  234.1828, found 234.1826.

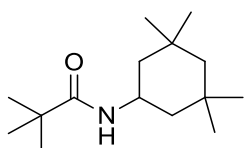

**N-(3,3,5,5-tetramethylcyclohexyl)pivalamide (S22):** Following the general conditions, the crude mixture was purified by flash chromatography over silica using hexane:ethyl acetate 1:1 and the product was concentrated to dryness. The product was isolated as a white solid (0.41 g, 55% yield).  $^1\text{H-NMR}$  ( $\text{CDCl}_3$ , 400 MHz, 300K)  $\delta$ , ppm:  $^1\text{H NMR}$  (300 MHz, Chloroform-*d*)  $\delta$  5.35 (d,  $J = 7.5$  Hz, 1H), 4.07 (dtd,  $J = 12.0, 8.2, 3.9$  Hz, 1H), 1.70 (dddd,  $J = 11.4, 3.7, 2.2, 1.3$  Hz, 2H), 1.36 – 1.19 (m, 2H), 1.18 (s, 9H), 1.07 (s, 6H), 0.91 (s, 6H), 0.84 (d,  $J = 12.0$  Hz, 2H).  $^{13}\text{C-NMR}$  177.6, 51.7, 46.1, 43.3, 38.5, 35.1, 32.2, 27.6, 27.3. HRMS(ESI+)  $m/z$  calculated for  $\text{C}_{15}\text{H}_{29}\text{NO}$   $[\text{M}+\text{Na}]^+$  262.2141, found 262.2139.

## 4. Oxidation reactions

Hydrogen peroxide solutions employed in the oxidation reactions were prepared by diluting commercially available hydrogen peroxide (30% H<sub>2</sub>O<sub>2</sub> solution in water, Aldrich) in acetonitrile to achieve a 1.5 M. Commercially available glacial acetic acid (99-100%) purchased from Riedel-de-Haën was employed. The purity of the amide substrates synthesized as described above was in all cases >99%. Carboxylic acids were purchased from Acros and Aldrich.

### 4.1 Reaction protocol for catalysis

An acetonitrile solution (400 µL) of the substrate (0.25 M) and the corresponding complex (2.5 mM) was prepared in a vial (10 mL) equipped with a stir bar cooled at -40 °C, in a CH<sub>3</sub>CN/N<sub>2</sub>(liq) bath. 98 µL (neat, 17 equiv.) of acetic acid were added directly to the solution. Then, 236 µL of a 1.5 M hydrogen peroxide solution in CH<sub>3</sub>CN (3.5 equiv.) were added by syringe pump over a period of 30 min. At this point, an internal standard (biphenyl) was added and the solution was quickly filtered through a basic alumina plug, which was subsequently rinsed with 2 x 1 mL AcOEt. GC analysis of the solution provided substrate conversions and product yields relative to the internal standard integration. Isomer ratio was determined by GC or <sup>1</sup>H-NMR. Commercially unavailable products were identified by a combination of <sup>1</sup>H, <sup>13</sup>C{<sup>1</sup>H}-NMR analysis, and HRMS. The oxidized products were identified by comparison to the GC retention time of racemate products.

Attempts to trap the alcohol product were performed by carrying out catalytic reactions in the presence of acetic anhydride or trifluoroacetic anhydride. Unfortunately, under these conditions oxidation did not take place. Reactions performed using substoichiometric amounts of oxidant, providing low conversion of the substrate did not result in the accumulation of the alcohol, indicating that this initial product is much more reactive against oxidation than the starting material, and can not accumulate in solution.

**Table S1. Oxidation of N-(cyclohexyl)pivalamide (S8) with (S,S)-[Mn(CF<sub>3</sub>SO<sub>3</sub>)<sub>2</sub>(<sup>TIPS</sup>cpcp)], (S,S)-[Mn(CF<sub>3</sub>SO<sub>3</sub>)<sub>2</sub>(<sup>TIPS</sup>chcp)] and (S,S)-[Mn(CF<sub>3</sub>SO<sub>3</sub>)<sub>2</sub>(<sup>TIPS</sup>tBucp)]**

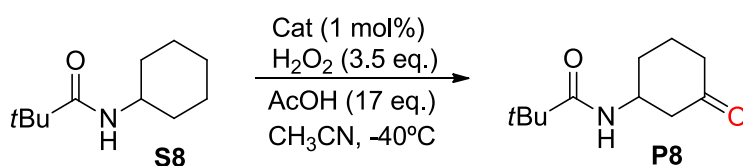

| Entry | Cat.                       | Conv (%) <sup>a</sup> | Yield (%) <sup>a</sup> | Ee % |
|-------|----------------------------|-----------------------|------------------------|------|
| 1     | Mn( <sup>TIPS</sup> cpcp)  | 85                    | 60                     | 80   |
| 2     | Mn( <sup>TIPS</sup> chcp)  | 22                    | 10                     | 86   |
| 3     | Mn( <sup>TIPS</sup> tBucp) | 31                    | 20                     | 56   |

<sup>a</sup>Conversions and yields determined from crude reaction mixtures by GC.  
Ee's determined by GC with chiral stationary phase

**Table S2. Oxidation of N-(cyclohexyl)pivalamide (S8) with (R,R)-[Mn(CF<sub>3</sub>SO<sub>3</sub>)<sub>2</sub>(<sup>TIPS</sup>mcp)] using different equivalents of acetic acid**

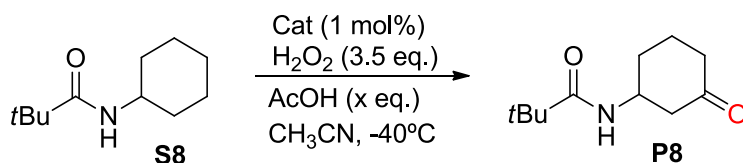

| Entry | x (equiv) | Conv (%) <sup>a</sup> | Yield K <sub>3</sub> (%) <sup>a</sup> | Ee % |
|-------|-----------|-----------------------|---------------------------------------|------|
| 1     | 50        | >99                   | 90                                    | 72   |
| 2     | 25        | >99                   | 90                                    | 73   |
| 3     | 17        | >99                   | 90                                    | 79   |
| 4     | 13        | >99                   | 84                                    | 79   |
| 5     | 10        | 80                    | 74                                    | 74   |
| 6     | 8         | 86                    | 74                                    | 78   |
| 7     | 5         | 33                    | 28                                    | 75   |

<sup>a</sup>Conversions and yields determined from crude reaction mixtures by GC.  
Ee's determined by GC with chiral stationary phase

## 4.2 General Procedure for product isolation

A 25 mL round bottom flask was charged with: catalyst (6  $\mu\text{mol}$ , 1.0 mol%), substrate (1 equiv.),  $\text{CH}_3\text{CN}$  (3.3 mL) and a magnetic stir bar. The carboxylic acid of choice was the added (17 equiv.) and the mixture was cooled at  $-40\text{ }^\circ\text{C}$  in an  $\text{CH}_3\text{CN}/\text{N}_2(\text{liq})$  bath under magnetic stirring. Then, 1.4 mL of a 1.5 M hydrogen peroxide solution in  $\text{CH}_3\text{CN}$  (3.5 equiv.) were added by syringe pump over a period of 30 min at  $-40\text{ }^\circ\text{C}$ . At this point, 15 mL of an aqueous  $\text{NaHCO}_3$  saturated solution were added to the mixture. The resultant solution was extracted with  $\text{CH}_2\text{Cl}_2$  (3 x 10 mL). Organic fractions were combined, dried over  $\text{MgSO}_4$ , and the solvent was removed under reduced pressure to afford the oxidized product. This residue was filtered by silica gel column to obtain the pure product.

## 5. Characterization of the isolated products

The oxidation products obtained after oxidation of substrates **S1**, **S3**, **S4**, **S5**, **S6**, **S18** and **S19** (**P1**, **P3**, **P4**, **P5**, **P6**, **P18**, **P19**, respectively) were collected as mixtures of C3 and C4 oxidation products.

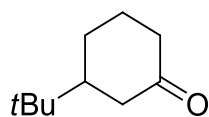

**3-tert-butylcyclohexanone (P1 (K<sub>3</sub>), Scheme 4)** purification by flash chromatography ( $\text{SiO}_2$ ; hexane:AcOEt 5:1) gave the product as a white solid (50% total yield ( $\text{K}_3+\text{K}_4$ ), 64% ee  $\text{K}_3$ );  $^1\text{H-NMR}$  ( $\text{CDCl}_3$ , 400 MHz, 300K)  $\delta$ , ppm: 2.45-2.43 (m, 1H), 2.37-2.35 (m, 1H), 2.23 (dt,  $J = 6.0, 13.5$  Hz, 1H), 2.12-2.08 (m, 1H), 2.04 (t,  $J = 12.0$  Hz, 1H), 1.96-1.91 (m, 1H), 1.59-1.45 (m, 2H), 1.32 (qd,  $J = 3.6, 12.8$  Hz, 1H), 0.89 (s, 9H). HRMS(ESI+)  $m/z$  calculated for  $\text{C}_{10}\text{H}_{18}\text{O}$   $[\text{M}+\text{Na}]^+$  177.1250, found 177.1250. Chiral GC analysis with CYCLOSIL-B. Spectroscopic data are in agreement with a previous literature report.<sup>16</sup>

**4-tert-butylcyclohexanone (P1 (K<sub>4</sub>))**  $^1\text{H-NMR}$  ( $\text{CDCl}_3$ , 400 MHz, 300K)  $\delta$ , ppm: 2.41-2.39 (m, 1H), 2.33-2.31 (m, 1H), 2.23 (dt,  $J = 6.0, 13.5$  Hz, 1H), 2.12-2.08 (m, 1H), 2.04 (t,  $J = 12.0$  Hz, 1H), 1.96-1.91 (m, 1H), 1.59-1.45 (m, 2H), 1.32 (qd,  $J = 3.6, 12.8$  Hz, 1H), 0.89 (s, 9H).  $^{13}\text{C-NMR}$  212.9, 49.4, 43.6, 41.3, 32.7, 27.2, 26.2, 25.6. Spectroscopic data are in agreement with a previous literature report.<sup>16</sup>

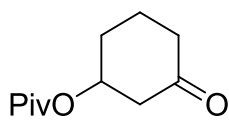

**3-oxocyclohexylpivalate (P2 (K<sub>3</sub>), Scheme 4)** purification by flash chromatography (SiO<sub>2</sub>; hexane:AcOEt 5:1) gave the product as a white solid (36% yield, 61% ee); <sup>1</sup>H-NMR (CDCl<sub>3</sub>, 400 MHz, 300K) δ, ppm: 5.18 (tt, *J* = 5.7, 3.0 Hz, 1H), 2.57 (ddd, *J* = 15.8, 10.2, 6.1 Hz, 2H), 2.42 – 2.36 (m, 2H), 2.19 – 2.02 (m, 4H), 1.26 (s, 9H). <sup>13</sup>C-NMR 209.9, 177.8, 68.0, 39.0, 37.2, 30.4, 27.2. HRMS(ESI+) *m/z* calculated for C<sub>11</sub>H<sub>18</sub>O<sub>3</sub> [M+Na]<sup>+</sup> 221.1148, found 221.1146. [α]<sub>D</sub><sup>24</sup> +9.3 (CHCl<sub>3</sub>, *c* 0.333). Chiral GC analysis with CYCLOSIL-B.

**4-oxocyclohexylpivalate (P2 (K<sub>4</sub>))** white solid product (9% yield); <sup>1</sup>H-NMR (CDCl<sub>3</sub>, 400 MHz, 300K) δ, ppm: 5.28 (tt, *J* = 5.5, 2.8 Hz, 1H), 2.64 (dd, *J* = 14.8, 4.2 Hz, 1H), 2.56 – 2.35 (m, 4H), 2.07 (dd, *J* = 11.3, 4.6 Hz, 1H), 1.98 (d, *J* = 7.9 Hz, 1H), 1.93 – 1.85 (m, 1H), 1.20 (s, 9H). <sup>13</sup>C-NMR 208.3, 177.5, 71.2, 46.4, 41.0, 29.7, 29.1, 27.1, 20.9. HRMS(ESI+) *m/z* calculated for C<sub>11</sub>H<sub>18</sub>O<sub>3</sub> [M+Na]<sup>+</sup> 221.1148, found 221.1140.

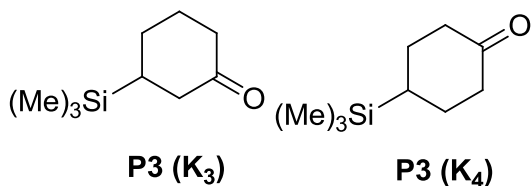

**(P3 (K<sub>3</sub>+K<sub>4</sub>), (R,R')-Mn-(<sup>TIPS</sup>mcp) as catalyst and**

**cyclopropanecarboxylic acid)** purification by flash chromatography (SiO<sub>2</sub>; hexane:AcOEt 3:1) gave the product as a white solid (49% total yield, 34% ee); <sup>1</sup>H-NMR (CDCl<sub>3</sub>, 400 MHz, 300K) δ, ppm: 1.81 – 1.70 (m, 8H), 1.29 – 1.21 (m, 5H), 1.10 (q, *J* = 12.7 Hz, 4H), 0.67 – 0.48 (m, 1H), -0.03 (s, *J* = 0.7 Hz, 18H). <sup>13</sup>C-NMR 28.1, 27.4, 27.0, 26.2, -3.6. HRMS(ESI+) *m/z* calculated for C<sub>9</sub>H<sub>18</sub>OSi [M+Na]<sup>+</sup> 193.1019, found 193.1019. Chiral GC analysis with CYCLOSIL-B.

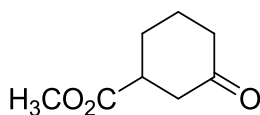

**methyl-3-oxocyclohexanecarboxylate (P4 (K<sub>3</sub>) Table 2, entry 4)** purification by flash chromatography (SiO<sub>2</sub>; hexane:AcOEt 4:1) gave the product as a white solid (52% total yield (K<sub>3</sub>+K<sub>4</sub>), 11% ee K<sub>3</sub>); <sup>1</sup>H-NMR (CDCl<sub>3</sub>, 400 MHz, 300K) δ, ppm: 3.69 (s, 3H), 2.84-2.75 (m, 1H), 2.55 (d, *J* = 8.0 Hz, 2H), 2.40-2.29 (m, 2H), 2.13-2.02 (m, 2H), 1.87-1.81 (m, 1H), 1.77-1.69 (m, 1H). HRMS(ESI+) *m/z* calculated for C<sub>8</sub>H<sub>12</sub>O<sub>3</sub> [M+Na]<sup>+</sup> 179.0679, found 179.0680. Chiral GC analysis with CYCLOSIL-B. Spectroscopic data are in agreement with a previous literature report.<sup>17</sup>

**methyl-4-oxocyclohexanecarboxylate (P4 (K<sub>4</sub>))** <sup>1</sup>H-NMR (CDCl<sub>3</sub>, 400 MHz, 300K) δ, 3.71 (s, 3H), 2.83- 2.75 (m, 1H), 2.50-2.46 (m, 2H), 2.40-2.29 (m, 2H), 2.23-2.19 (m, 2H), 2.13-2.02 (m, 2H). Spectroscopic data are in agreement with a previous literature report.<sup>18</sup>

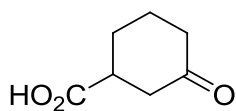

**P5 (K<sub>3</sub>)**

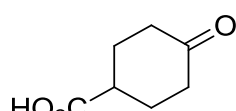

**P5 (K<sub>4</sub>)**

**(P5 (K<sub>3</sub>+K<sub>4</sub>), Table 2, entry 5)** purification by flash chromatography (SiO<sub>2</sub>; hexane:AcOEt 2:1) gave the product as a white solid (30% total yield, 9% ee K<sub>3</sub>); <sup>1</sup>H-NMR (CDCl<sub>3</sub>, 400 MHz, 300K) δ, ppm: 2.93-2.80 (m, 2H), 2.61-2.58 (m, 2H), 2.56-2.50 (m, 2H), 2.44-2.36 (m, 4H), 2.30-2.23 (m, 2H), 2.22-2.16 (m, 1H), 2.14-2.03 (m, 3H), 1.96-1.87 (m, 1H), 1.84-1.74 (m, 1H). <sup>13</sup>C-NMR 209.9, 209.0, 180.4, 179.4, 42.9, 42.7, 40.9, 40.3, 39.6, 29.7, 28.2, 27.5, 24.3. HRMS(ESI+) *m/z* calculated for C<sub>7</sub>H<sub>9</sub>O<sub>3</sub> [M] 141.0546, found 141.0563. Chiral GC analysis with CYCLOSIL-B. Spectroscopic data are in agreement with a previous literature report.<sup>19</sup> The ee was determined after esterification following a reported procedure.<sup>19</sup>

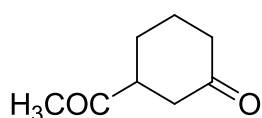

**P6 (K<sub>3</sub>)**

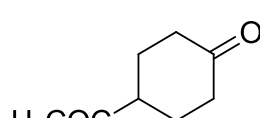

**P6 (K<sub>4</sub>)**

**(P6 (K<sub>3</sub>+K<sub>4</sub>), Table 2, entry 6)** purification by flash chromatography (SiO<sub>2</sub>; hexane:AcOEt 4:1) gave the product as a white solid (66% total yield, 8% ee K<sub>3</sub>); <sup>1</sup>H-NMR (CDCl<sub>3</sub>, 400 MHz, 300K) δ, ppm: 2.90 – 2.80 (m, 1H), 2.79 – 2.72 (m, 1H), 2.47-2.36 (m, 3H), 2.34 – 2.22 (m, 4H), 2.17 (s, 3H), 2.14 (s, 3H), 2.07-1.97 (m, 3H), 1.89-1.79 (m, 1H), 1.75-1.59 (m, 2H). <sup>13</sup>C-NMR 210.0, 209.8, 209.7, 208.5, 50.8, 48.4, 42.3, 40.8, 39.7, 28.17, 28.15, 27.8, 27.1, 24.7. HRMS(ESI+) *m/z* calculated for C<sub>8</sub>H<sub>12</sub>O<sub>2</sub> [M+Na]<sup>+</sup> 163.0730, found 163.0738. Chiral GC analysis with CYCLOSIL-B.

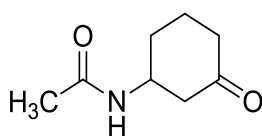

**N-(3-oxocyclohexyl)acetamide (P7, Table 4, entry 1)**, purification by flash

chromatography (SiO<sub>2</sub>; hexane:AcOEt 1:1) gave the product as a white solid; (61% yield, 78% ee); <sup>1</sup>H-NMR (CDCl<sub>3</sub>, 400 MHz, 300K) δ, ppm: 5.79 (bs, 1H), 4.30 - 4.25 (m, 1H), 2.72-2.68 (m, 1H), 2.47-2.38 (m, 2H), 2.28 (m, 2H), 2.09 (m, 1H), 1.98 (s, 3H), 1.78 – 1.69 (m, 2H). <sup>13</sup>C-NMR 209.0, 169.4,

48.5, 47.6, 41.0, 30.8, 23.4, 22.1. HRMS(ESI+)  $m/z$  calculated for  $C_8H_{13}NO_2$   $[M+Na]^+$  178.0838, found 178.0839.  $[\alpha]_D^{24}$  -6.1 ( $CHCl_3$ ,  $c$  0.312). Chiral GC analysis with CYCLOSIL-B.

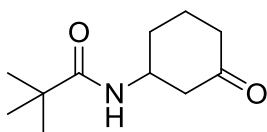

***N*-(3-oxocyclohexyl)pivalamide (P8, Table 4, entry 3)**, purification by flash

chromatography ( $SiO_2$ ; hexane:AcOEt 1:1) gave the product as a white solid (84% yield, 91% ee);  $^1H$ -NMR ( $CDCl_3$ , 400 MHz, 300K)  $\delta$ , ppm: 5.60 (bs, 1H), 4.33 - 4.15 (m, 1H), 2.69 (ddt,  $J$  = 13.9, 4.8, 1.5 Hz, 1H), 2.49 - 2.20 (m, 3H), 2.14 - 1.97 (m, 1H), 1.99 - 1.59 (m, 3H), 1.18 (s, 6H).  $^{13}C$ -NMR 209.0, 177.7, 48.4, 47.6, 41.0, 38.6, 30.7, 27.5, 22.2. HRMS(ESI+)  $m/z$  calculated for  $C_{11}H_{19}NO_2$   $[M+Na]^+$  220.1308, found 220.1307.  $[\alpha]_D^{24}$  -2.9 ( $CHCl_3$ ,  $c$  0.272). Chiral GC analysis with CYCLOSIL-B.

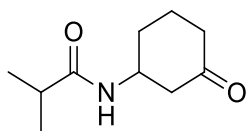

***N*-(3-oxocyclohexyl)isobutyramide (P9, Table 4, entry 2)**, purification by flash

chromatography ( $SiO_2$ ; hexane:AcOEt 1:1) gave the product as a white solid (60% yield, 88% ee);  $^1H$ -NMR ( $CDCl_3$ , 400 MHz, 300K)  $\delta$ , ppm: 5.57 (bs, 1H), 4.35 - 4.17 (m, 1H), 2.69 (ddt,  $J$  = 13.9, 4.8, 1.4 Hz, 1H), 2.48 - 2.18 (m, 4H), 2.14 - 1.92 (m, 2H), 1.86 - 1.62 (m, 2H), 1.14 (dd,  $J$  = 6.9, 1.0 Hz, 6H).  $^{13}C$ -NMR 209.0, 176.3, 48.2, 47.6, 41.0, 35.6, 30.7, 22.1, 19.6, 19.5 HRMS(ESI+)  $m/z$  calculated for  $C_{10}H_{17}NO_2$   $[M+Na]^+$  206.1151, found 206.1152.  $[\alpha]_D^{24}$  -6.5 ( $CHCl_3$ ,  $c$  0.232). Chiral GC analysis with CYCLOSIL-B.

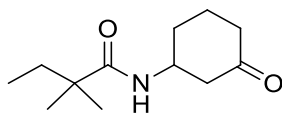

***(S)*-N-(3-oxocyclohexyl)-2,2-dimethylbutanamide (P10, Table 4, entry 4)**,

purification by flash chromatography ( $SiO_2$ ; hexane:AcOEt 1:1) gave the product as a white solid; (85% yield, 94% ee);  $^1H$ -NMR ( $CDCl_3$ , 400 MHz, 300K)  $\delta$ , ppm: 5.81 (d,  $J$  = 6.3 Hz, 1H), 4.25 - 4.08 (m, 1H), 2.60 (d,  $J$  = 13.6 Hz, 1H), 2.38 - 2.26 (m, 1H), 2.26 - 2.13 (m, 2H), 2.00 - 1.90 (m, 1H), 1.65 (q,  $J$  = 12.0, 10.7 Hz, 2H), 1.46 (q,  $J$  = 7.3 Hz, 2H), 1.07 (s, 6H), 0.76 (t,  $J$  = 7.3 Hz, 3H).  $^{13}C$ -NMR 208.9, 176.9, 48.3, 47.6, 42.2, 40.8, 33.8, 30.8, 24.84, 24.82, 22.2, 9.1. HRMS(ESI+)  $m/z$  calculated for  $C_{12}H_{21}NO_2$   $[M+H]^+$  234.1465, found 234.1464.  $[\alpha]_D^{24}$  -5.2 ( $CHCl_3$ ,  $c$  0.302). Chiral GC analysis with CYCLOSIL-B. Structure was confirmed by X-Ray diffraction analysis.



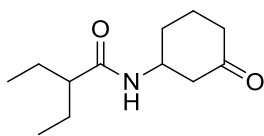

**N-(3-oxocyclohexyl)-2-ethylbutanamide (P11, Table 4, entry 5),** purification by

flash chromatography (SiO<sub>2</sub>; hexane:AcOEt 1:1) gave the product as a white solid; (45% yield, 96% ee); <sup>1</sup>H-NMR (CDCl<sub>3</sub>, 400 MHz, 300K) δ, ppm: 5.71 (d, *J* = 6.9 Hz, 1H), 4.31 (qt, *J* = 8.8, 4.4 Hz, 1H), 2.69 (dd, *J* = 14.1, 4.9 Hz, 1H), 2.45 - 2.22 (m, 2H), 2.12 - 1.93 (m, 2H), 1.83 (ddd, *J* = 14.1, 9.1, 5.1 Hz, 1H), 1.79 - 1.60 (m, 2H), 1.62 - 1.53 (m, 2H), 1.52 - 1.40 (m, 2H), 0.87 (td, *J* = 7.4, 3.4 Hz, 6H). <sup>13</sup>C-NMR 209.0, 175.0, 51.3, 48.3, 47.8, 40.9, 30.9, 25.8, 25.7, 22.1, 12.05, 12.02. HRMS(ESI+) *m/z* calculated for C<sub>12</sub>H<sub>21</sub>NO<sub>2</sub> [M+Na]<sup>+</sup> 234.1465, found 234.1459. [α]<sub>D</sub><sup>24</sup> -5.17 (CHCl<sub>3</sub>, *c* 0.6). Chiral GC analysis with CYCLOSIL-B.

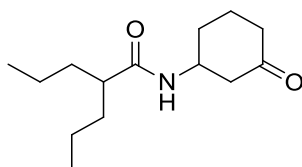

**N-(3-oxocyclohexyl)-2-ethylbutanamide (P12, Table 4, entry 6),** purification

by flash chromatography (SiO<sub>2</sub>; hexane:AcOEt 1:1) gave the product as a white solid; (8% yield, 90% ee); <sup>1</sup>H-NMR (CDCl<sub>3</sub>, 400 MHz, 300K) δ, ppm: 5.46 (d, *J* = 7.3 Hz, 1H), 4.32 (qt, *J* = 8.5, 4.3 Hz, 1H), 2.71 (dd, *J* = 14.1, 4.9 Hz, 1H), 2.46 - 2.37 (m, 1H), 2.30 (dt, *J* = 14.2, 7.9 Hz, 2H), 2.09 (dd, *J* = 12.8, 3.4 Hz, 1H), 1.98 (ddd, *J* = 12.7, 8.7, 5.1 Hz, 2H), 1.86 - 1.66 (m, 3H), 1.65 - 1.54 (m, 2H), 1.43 - 1.29 (m, 6H), 0.94 - 0.89 (m, 6H). <sup>13</sup>C-NMR 208.9, 175.3, 48.3, 47.77, 47.76, 41.0, 35.3, 35.2, 30.9, 29.7, 22.2, 20.8, 20.7, 14.1. HRMS(ESI+) *m/z* calculated for C<sub>14</sub>H<sub>25</sub>NO<sub>2</sub> [M+Na]<sup>+</sup> 262.1778, found 262.1781. [α]<sub>D</sub><sup>24</sup> -2.0 (CHCl<sub>3</sub>, *c* 0.204). Chiral GC analysis with CYCLOSIL-B.

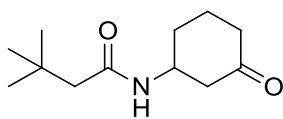

**N-(3-oxocyclohexyl)-3,3-dimethylbutanamide (P13, Table 4, entry 7),**

purification by flash chromatography (SiO<sub>2</sub>; hexane:AcOEt 1:2) gave the product as a white solid (69% yield, 94% ee); <sup>1</sup>H-NMR (CDCl<sub>3</sub>, 400 MHz, 300K) δ, ppm: 6.18 (d, *J* = 7.7 Hz, 1H), 4.21 - 4.12 (m, 1H), 2.59 (dd, *J* = 14.0, 4.8 Hz, 1H), 2.39 - 2.16 (m, 3H), 1.97 (s, 4H), 1.74 - 1.56 (m, 2H), 0.96 (s, 9H). <sup>13</sup>C-NMR 209.1, 171.0, 50.2, 48.2, 47.7, 40.8, 30.9, 30.8, 29.8, 22.1. HRMS(ESI+) *m/z* calculated for C<sub>12</sub>H<sub>21</sub>NO<sub>2</sub> [M+Na]<sup>+</sup> 234.1465, found 234.1472. [α]<sub>D</sub><sup>24</sup> -7.3 (CHCl<sub>3</sub>, *c* 0.94). Chiral GC analysis with CYCLOSIL-B.

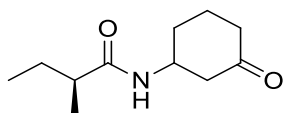

***N*-(3-oxocyclohexyl)-(S)-(+)-2-methylbutanamide (P14, Table 4, entry 8),**

purification by flash chromatography (SiO<sub>2</sub>; hexane:AcOEt 1:1) gave the product as a white solid; (50% yield, 91% ee); <sup>1</sup>H-NMR (CDCl<sub>3</sub>, 400 MHz, 300K) δ, ppm: 5.97 (d, *J* = 7.2 Hz, 1H), 4.28 - 4.15 (m, 1H), 2.65 (dd, *J* = 14.1, 4.8 Hz, 1H), 2.36 (d, *J* = 14.6 Hz, 1H), 2.30 - 2.20 (m, 2H), 2.05 (dt, *J* = 16.4, 8.2 Hz, 2H), 1.97 - 1.94 (m, 1H), 1.74 - 1.67 (m, 2H), 1.65 - 1.58 (m, 1H), 1.43 - 1.36 (m, 1H), 1.08 (d, *J* = 6.9 Hz, 3H), 0.85 (t, *J* = 7.4 Hz, 3H). <sup>13</sup>C-NMR 209.0, 175.8, 48.2, 47.8, 43.0, 40.9, 30.8, 27.3, 22.1, 17.5, 11.8. HRMS(ESI+) *m/z* calculated for C<sub>11</sub>H<sub>19</sub>NO<sub>2</sub> [M+Na]<sup>+</sup> 220.1308, found 220.1303. [α]<sub>D</sub><sup>24</sup> +9.5 (CHCl<sub>3</sub>, *c* 0.508). Chiral GC analysis with CYCLOSIL-B.

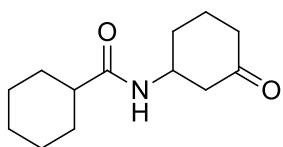

***N*-(3-oxocyclohexyl)cyclohexanecarboxamide (P15, Table 4, entry 9),**

purification by flash chromatography (SiO<sub>2</sub>; hexane:AcOEt 1:1) gave the product as a white solid (75% yield, 91% ee); <sup>1</sup>H-NMR (CDCl<sub>3</sub>, 400 MHz, 300K) δ, ppm: 5.55 (d, *J* = 6.6 Hz, 1H), 4.31 - 4.23 (m, 1H), 2.69 (dd, *J* = 14.0, 4.8 Hz, 1H), 2.46 - 2.35 (m, 1H), 2.30 - 2.24 (m, 2H), 2.04 (t, *J* = 11.7 Hz, 2H), 1.79 (d, *J* = 13.8 Hz, 4H), 1.72 - 1.63 (m, 2H), 1.42 (dd, *J* = 22.9, 12.4 Hz, 2H), 1.25 (dd, *J* = 17.2, 10.9 Hz, 5H). <sup>13</sup>C-NMR 209.0, 175.4, 48.2, 47.7, 45.5, 41.0, 30.7, 29.7, 29.6, 25.68, 25.66, 22.16. HRMS(ESI+) *m/z* calculated for C<sub>13</sub>H<sub>21</sub>NO<sub>2</sub> [M+Na]<sup>+</sup> 246.1465, found 246.1473. [α]<sub>D</sub><sup>24</sup> -2.7 (CHCl<sub>3</sub>, *c* 0.412). Chiral GC analysis with CYCLOSIL-B.

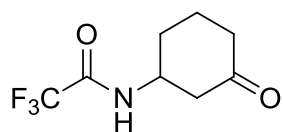

***N*-(3-oxocyclohexyl)trifluoroacetamide (P17, Table 4, entry 11),** purification

by flash chromatography (SiO<sub>2</sub>; hexane:AcOEt 1:1) gave the product as a white solid (65% yield, 65% ee); <sup>1</sup>H-NMR (CDCl<sub>3</sub>, 400 MHz, 300K) δ, ppm: 7.19 (s, 1H), 4.21 (s, 1H), 2.69 (dd, *J* = 14.3, 4.9 Hz, 1H), 2.50 - 2.35 (m, 2H), 2.35 - 2.19 (m, 1H), 2.19 - 1.98 (m, 2H), 1.88 - 1.67 (m, 2H). <sup>13</sup>C-NMR 207.9, 156.8, 49.2, 46.5, 40.5, 38.8, 30.0, 21.8. HRMS(ESI+) *m/z* calculated for C<sub>10</sub>H<sub>8</sub>F<sub>3</sub>NO<sub>2</sub> [M+H]<sup>+</sup> 232.0580, found 232.0560. [α]<sub>D</sub><sup>24</sup> -5.6 (CHCl<sub>3</sub>, *c* 0.54). Chiral GC analysis with CYCLOSIL-B.

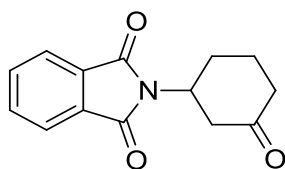

**P18 (K<sub>3</sub>)**

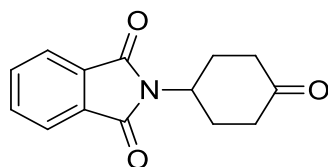

**P18 (K<sub>4</sub>)**

***N*-(3-oxocyclohexyl)phthalimide (P18 (K<sub>3</sub>+K<sub>4</sub>), Table 4, entry 12)**, purification by flash chromatography (SiO<sub>2</sub>; hexane:AcOEt 3:1) gave the product as a white solid; (37% total yield, 62% ee K<sub>3</sub>); <sup>1</sup>H-NMR (CDCl<sub>3</sub>, 400 MHz, 300K) δ, ppm: 7.90 – 7.80 (m, 3H), 7.78 – 7.67 (m, 3H), 4.64 (tt, *J* = 12.1, 4.1 Hz, 1H), 4.57 – 4.43 (m, 1H), 3.41 – 3.27 (m, 1H), 2.83 – 2.63 (m, 1H), 2.58 – 2.49 (m, 5H), 2.20 – 2.11 (m, 2H), 2.09 – 2.05 (m, 1H), 1.99 – 1.95 (m, 1H), 1.69 (dddd, *J* = 17.5, 12.7, 10.4, 6.6, 3.5 Hz, 1H). <sup>13</sup>C-NMR 208.8, 207.8, 168.1, 167.9, 134.2, 134.1, 131.8, 131.7, 123.34, 123.26, 49.0, 48.3, 44.8, 40.4, 39.8, 28.6, 22.4. HRMS(ESI+) *m/z* calculated for C<sub>14</sub>H<sub>13</sub>NO<sub>3</sub> [M+Na]<sup>+</sup> 266.0788, found 266.0783. HPLC analysis. Spectroscopic data are in agreement with a previous literature report.<sup>20</sup>

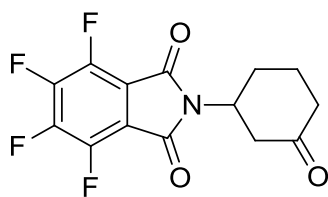

**P19 (K<sub>3</sub>)**

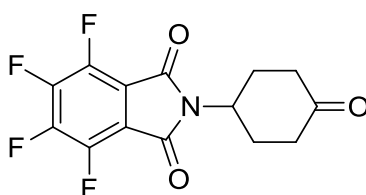

**P19 (K<sub>4</sub>)**

***N*-(3-oxocyclohexyl)tetrafluorophthalimide (P19 (K<sub>3</sub>+K<sub>4</sub>), Table 4, entry 13)** purification by flash chromatography (SiO<sub>2</sub>; hexane:AcOEt 3:1) gave the product as a white solid; (40% total yield); <sup>1</sup>H-NMR (CDCl<sub>3</sub>, 400 MHz, 300K) δ, ppm: 4.62 (tt, *J* = 12.1, 4.1 Hz, 1H), 4.53 – 4.44 (m, 1H), 3.28 (ddd, *J* = 13.5, 12.4, 0.9 Hz, 1H), 2.68 (qd, *J* = 12.7, 5.5 Hz, 2H), 2.57 – 2.37 (m, 8H), 2.20 – 2.00 (m, 1H), 2.13 – 2.03 (m, 2H), 1.96 (dtt, *J* = 12.9, 3.9, 2.2 Hz, 1H), 1.78 – 1.65 (m, 1H). <sup>13</sup>C-NMR 146.4, 144.8, 143.8, 142.1, 113.5, 49.8, 49.2, 44.4, 40.3, 39.6, 28.3, 22.2. HRMS(ESI+) *m/z* calculated for C<sub>14</sub>H<sub>9</sub>F<sub>4</sub>NO<sub>3</sub> [M+Na]<sup>+</sup> 338.0411, found 338.0417. HPLC analysis.

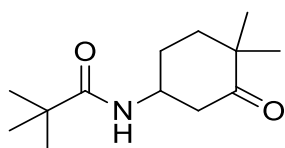

***N*-(4,4-dimethyl-3-oxocyclohexyl)pivalamide (P20, Scheme 4)**, purification

by flash chromatography (SiO<sub>2</sub>; hexane:AcOEt 1:1) gave the product as a white solid; (52% yield, 76% ee); <sup>1</sup>H-NMR (CDCl<sub>3</sub>, 400 MHz, 300K) δ, ppm: 5.57 (s, 1H), 4.22 – 4.13 (m, 1H), 2.70 (ddd, *J* =

14.1, 4.9, 1.5 Hz, 1H), 2.43 (dd,  $J = 14.1, 9.6$  Hz, 1H), 2.03 (ddtd,  $J = 13.4, 8.0, 4.0, 2.0$  Hz, 1H), 1.87 – 1.74 (m, 1H), 1.74 – 1.61 (m, 2H), 1.20 (s, 9H), 1.15 (d,  $J = 9.9$  Hz, 6H).  $^{13}\text{C-NMR}$  213.0, 177.7, 49.0, 44.5, 43.9, 38.7, 36.6, 27.5, 27.3, 25.0, 24.7. HRMS(ESI+)  $m/z$  calculated for  $\text{C}_{13}\text{H}_{23}\text{NO}_2$   $[\text{M}+\text{Na}]^+$  248.1621, found 248.1621.  $[\alpha]_{\text{D}}^{24} +19.5$  ( $\text{CHCl}_3$ ,  $c$  0.574). Chiral GC analysis with CYCLOSIL-B.

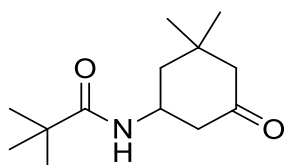

***N*-(5,5-dimethyl-3-oxocyclohexyl)pivalamide (P21, Scheme 4)**, purification

by flash chromatography ( $\text{SiO}_2$ ; hexane:AcOEt 1:1) gave the product as a white solid; (39% yield, 55% ee);  $^1\text{H-NMR}$  ( $\text{CDCl}_3$ , 400 MHz, 300K)  $\delta$ , ppm: 5.47 (d,  $J = 7.6$  Hz, 1H), 4.28 (tddd,  $J = 12.0, 7.8, 5.0, 4.3$  Hz, 1H), 2.69 (ddt,  $J = 13.7, 5.1, 1.8$  Hz, 1H), 2.36 – 2.07 (m, 3H), 1.90 (ddt,  $J = 12.9, 4.0, 1.9$  Hz, 1H), 1.59 – 1.42 (m, 1H), 1.19 (s, 9H), 1.09 (s, 3H), 0.95 (s, 3H).  $^{13}\text{C-NMR}$  208.1, 177.7, 54.1, 47.1, 45.2, 44.7, 38.6, 33.5, 31.7, 27.5, 25.9. HRMS(ESI+)  $m/z$  calculated for  $\text{C}_{13}\text{H}_{23}\text{NO}_2$   $[\text{M}+\text{Na}]^+$  248.1621, found 248.1627.  $[\alpha]_{\text{D}}^{24} -12.0$  ( $\text{CHCl}_3$ ,  $c$  0.366). Chiral GC analysis with CYCLOSIL-B



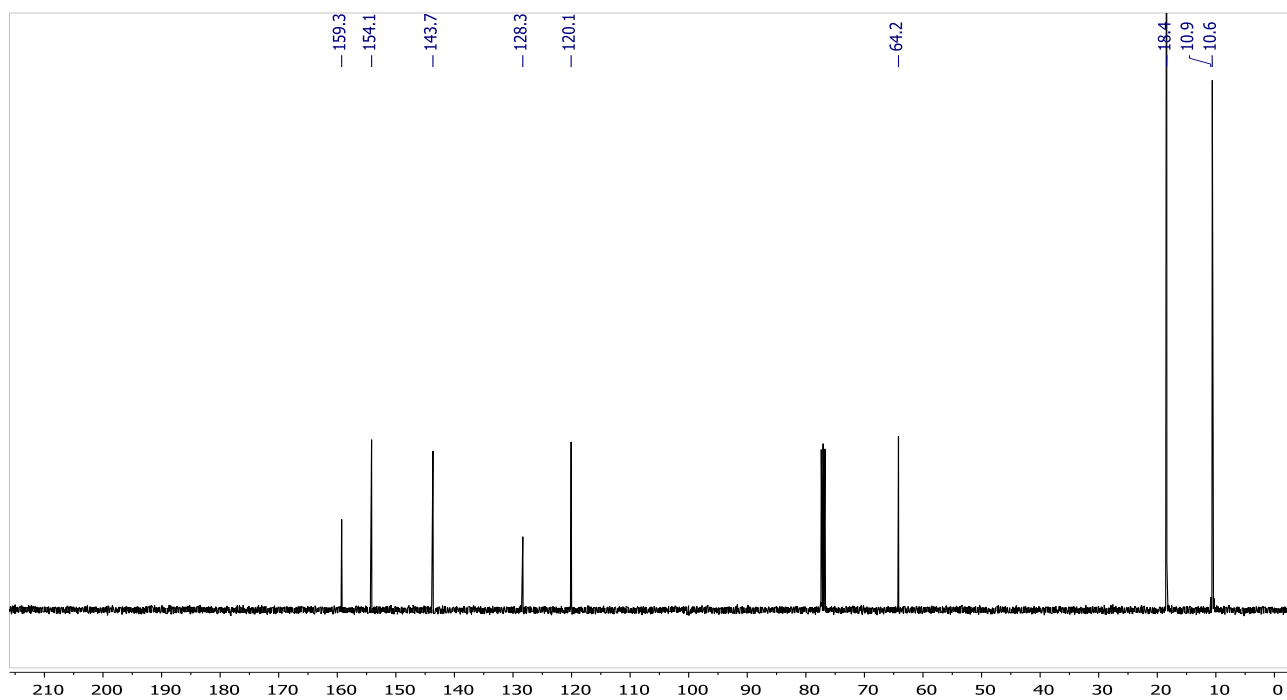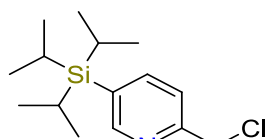

HCl

<sup>1</sup>H-NMR of TIPS-PyCl in CDCl<sub>3</sub>

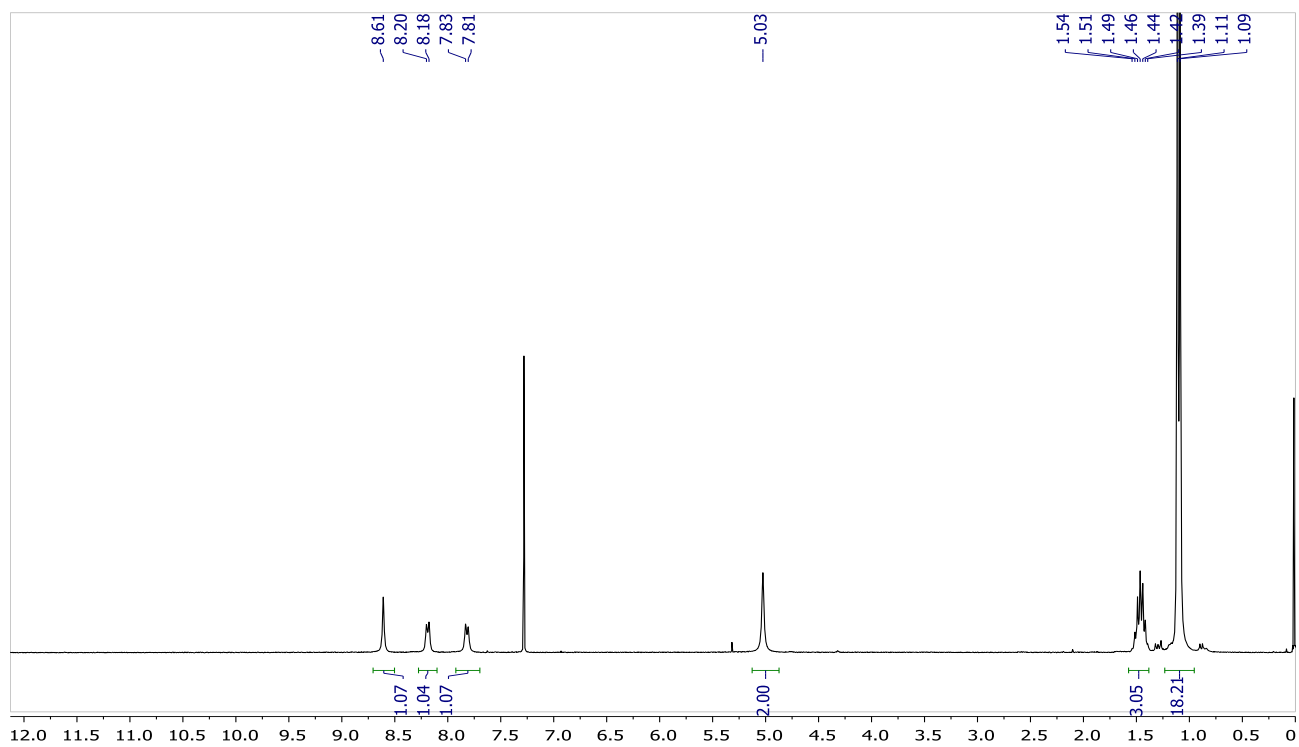

<sup>13</sup>C{<sup>1</sup>H}-NMR of TIPS-PyCl in CDCl<sub>3</sub>

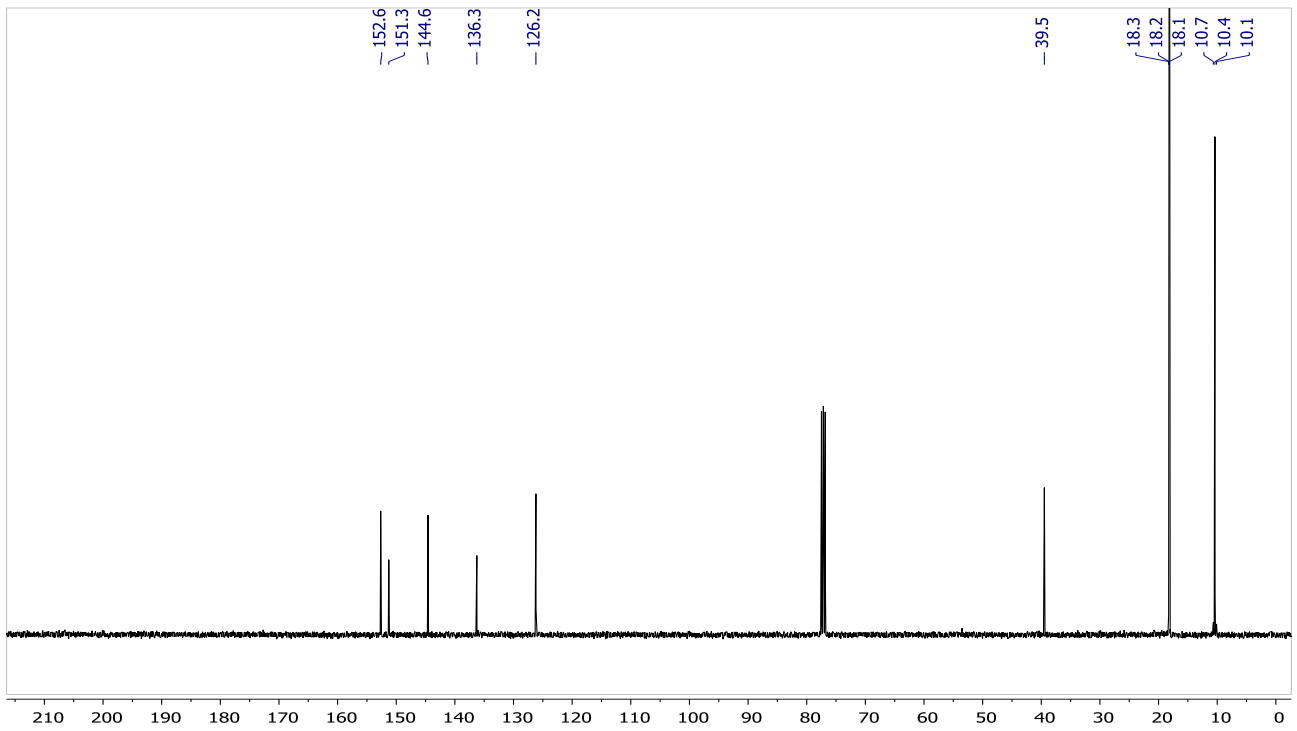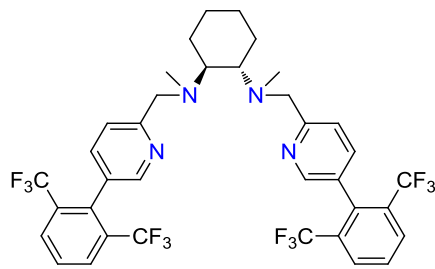

$^1H$ -NMR of  $CF_3$  mcp in  $CDCl_3$

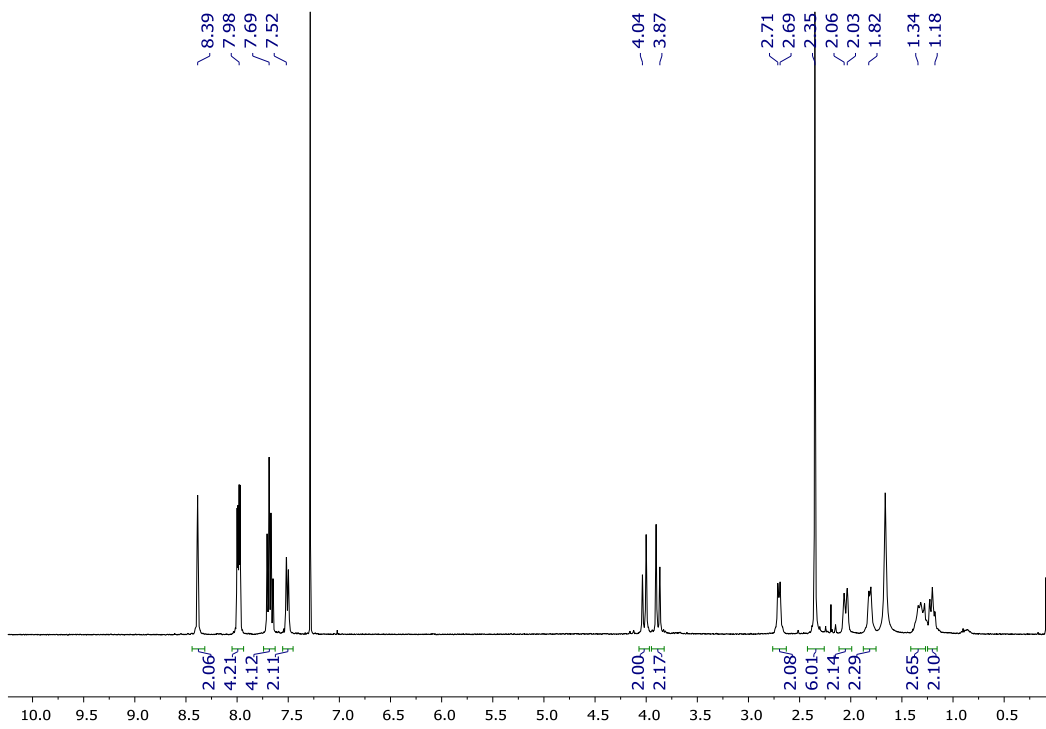

$^{13}C\{^1H\}$ -NMR of  $CF_3$  mcp in  $CDCl_3$

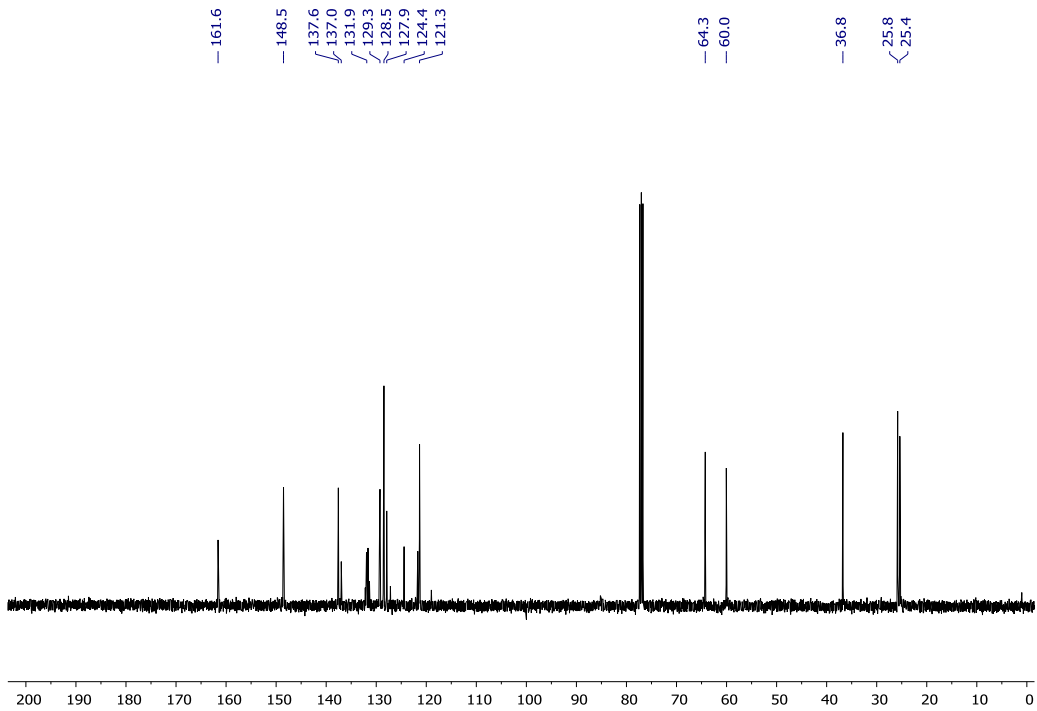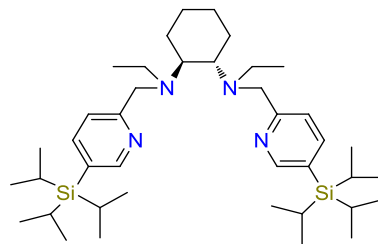

$^1\text{H}$ -NMR of  $\text{TIPS}^{\text{ecp}}$  in  $\text{CDCl}_3$

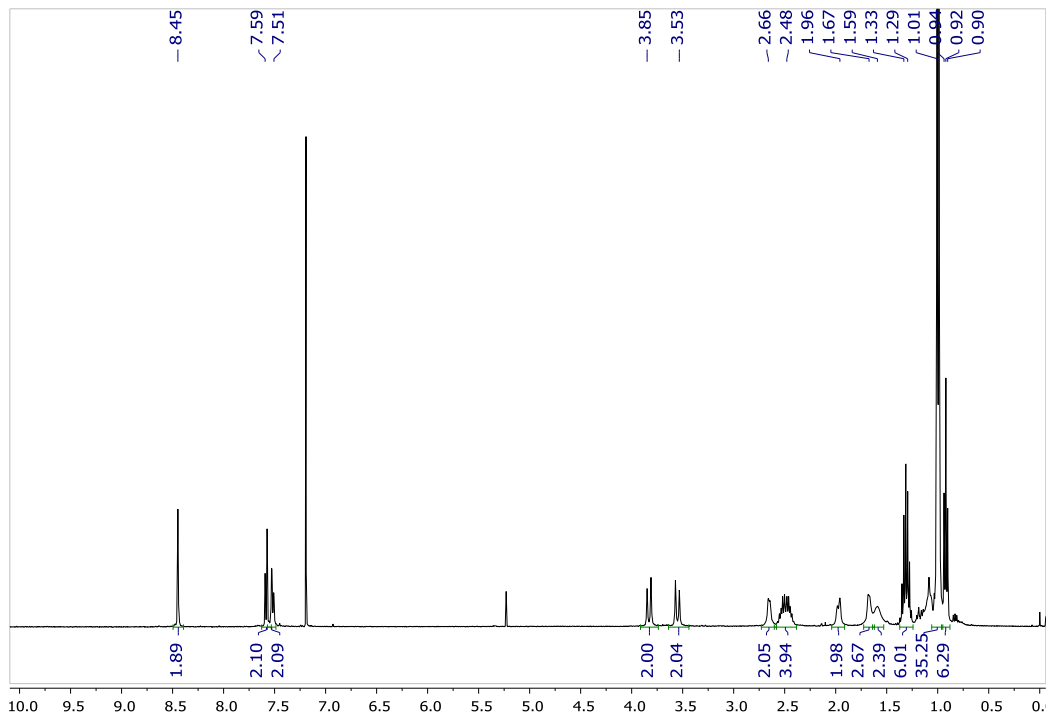

$^{13}\text{C}\{^1\text{H}\}$ -NMR of  $\text{TIPS}^{\text{ecp}}$  in  $\text{CDCl}_3$



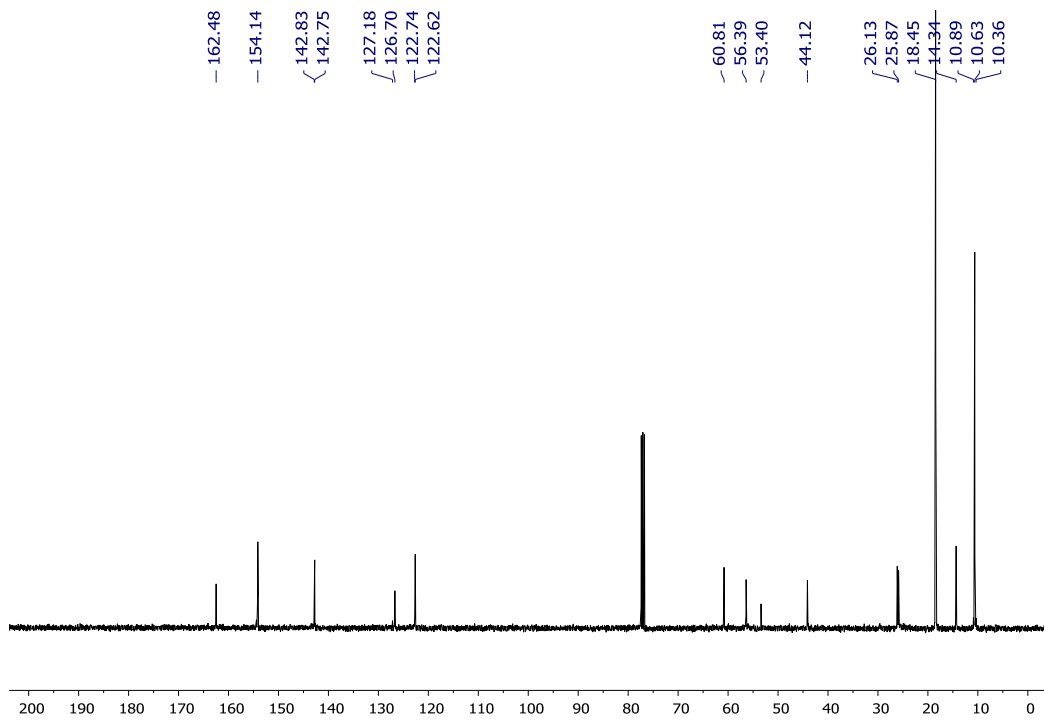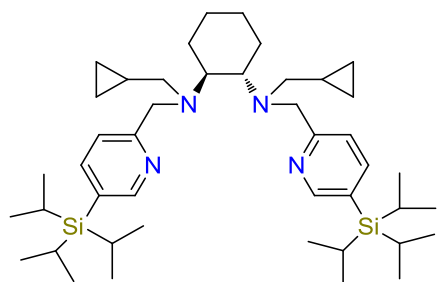

<sup>1</sup>H-NMR of TIPS<sub>2</sub>cpcp in CDCl<sub>3</sub>

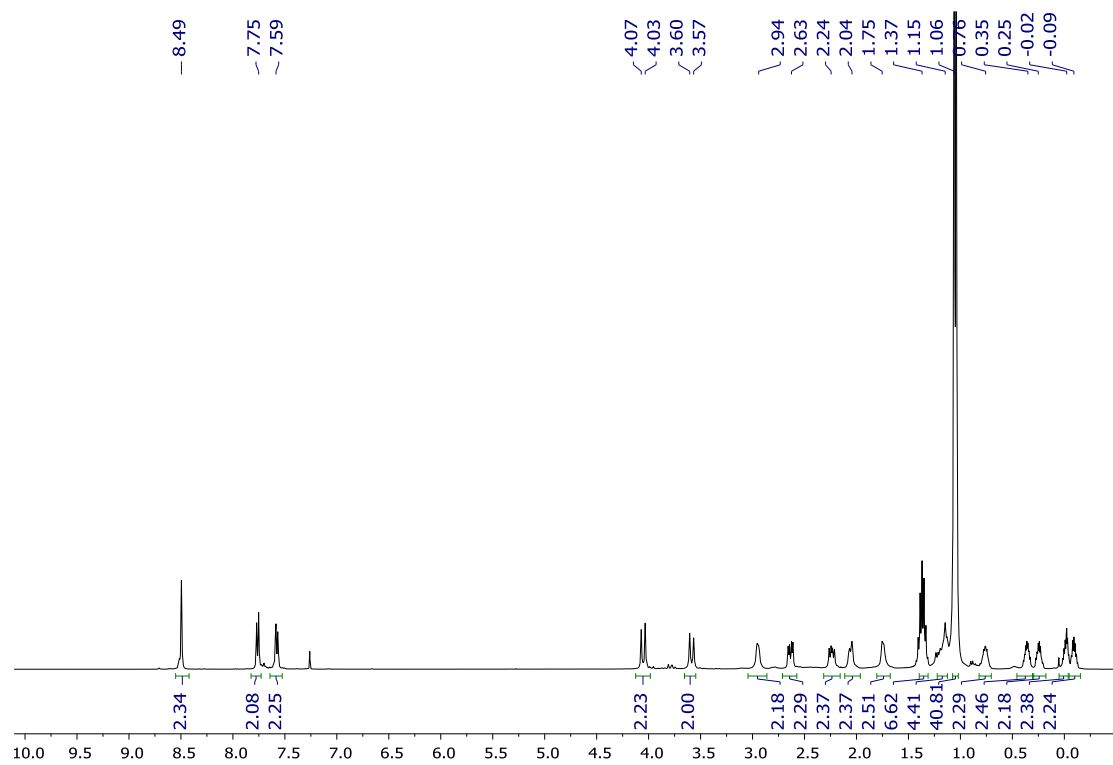



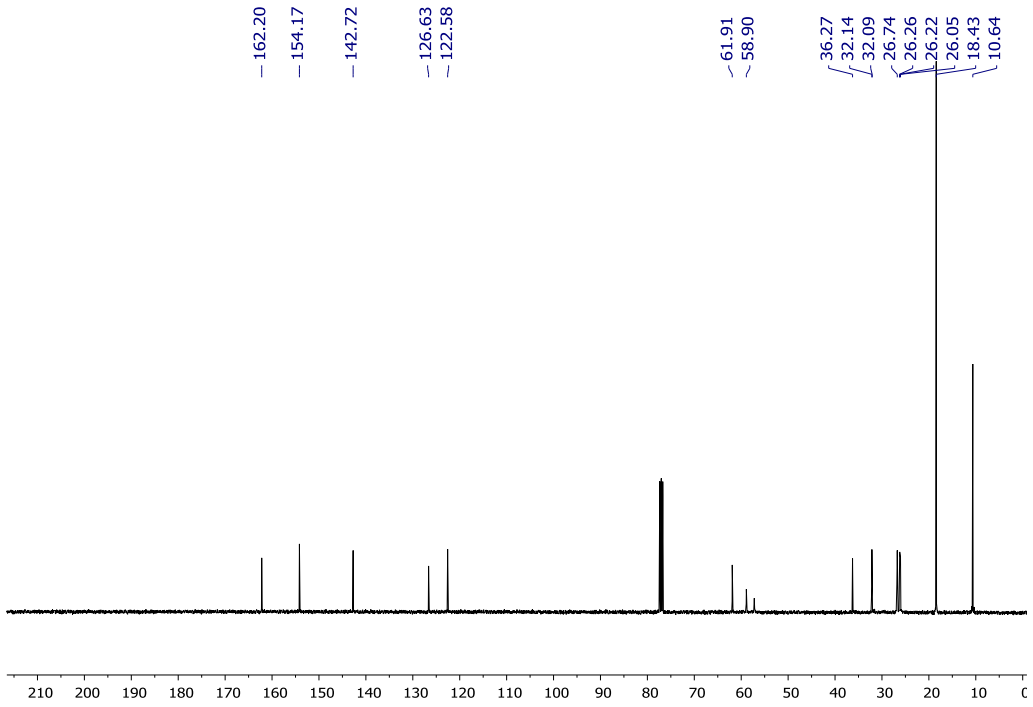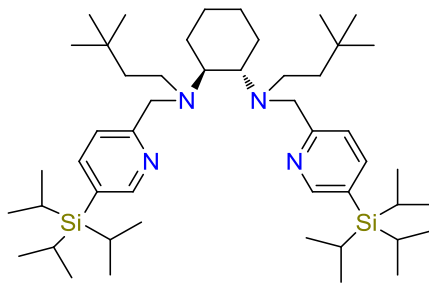

$^1\text{H-NMR}$  of  $\text{TIPS-tBucp}$  in  $\text{CDCl}_3$

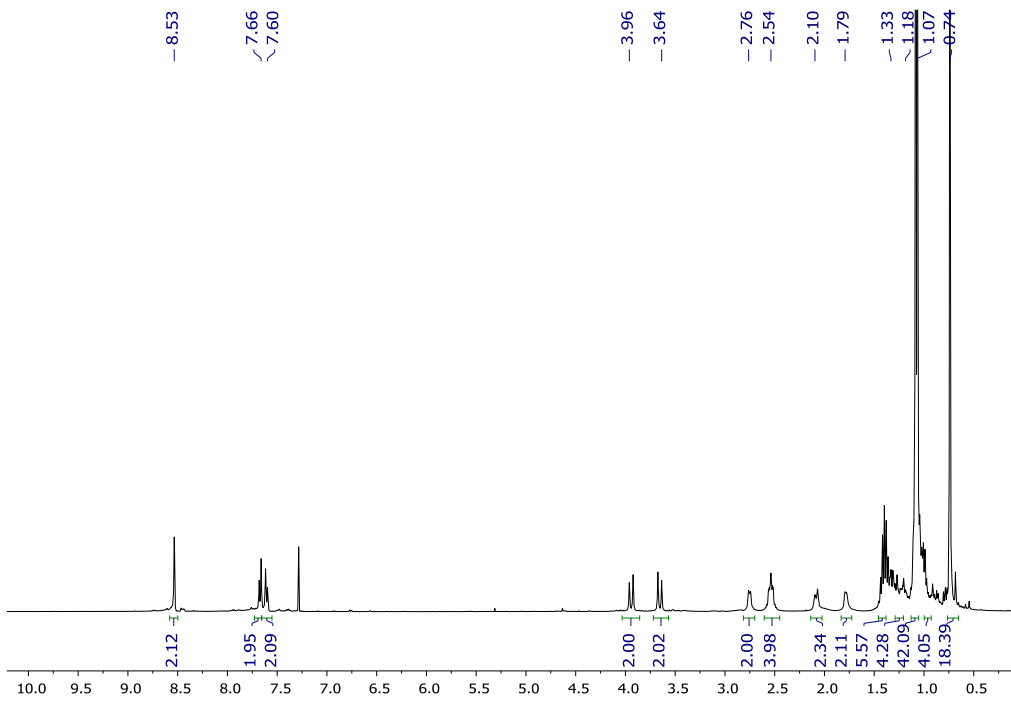

$^{13}\text{C}\{^1\text{H}\}$ -NMR of  $\text{TIPS-tBucp}$  in  $\text{CDCl}_3$

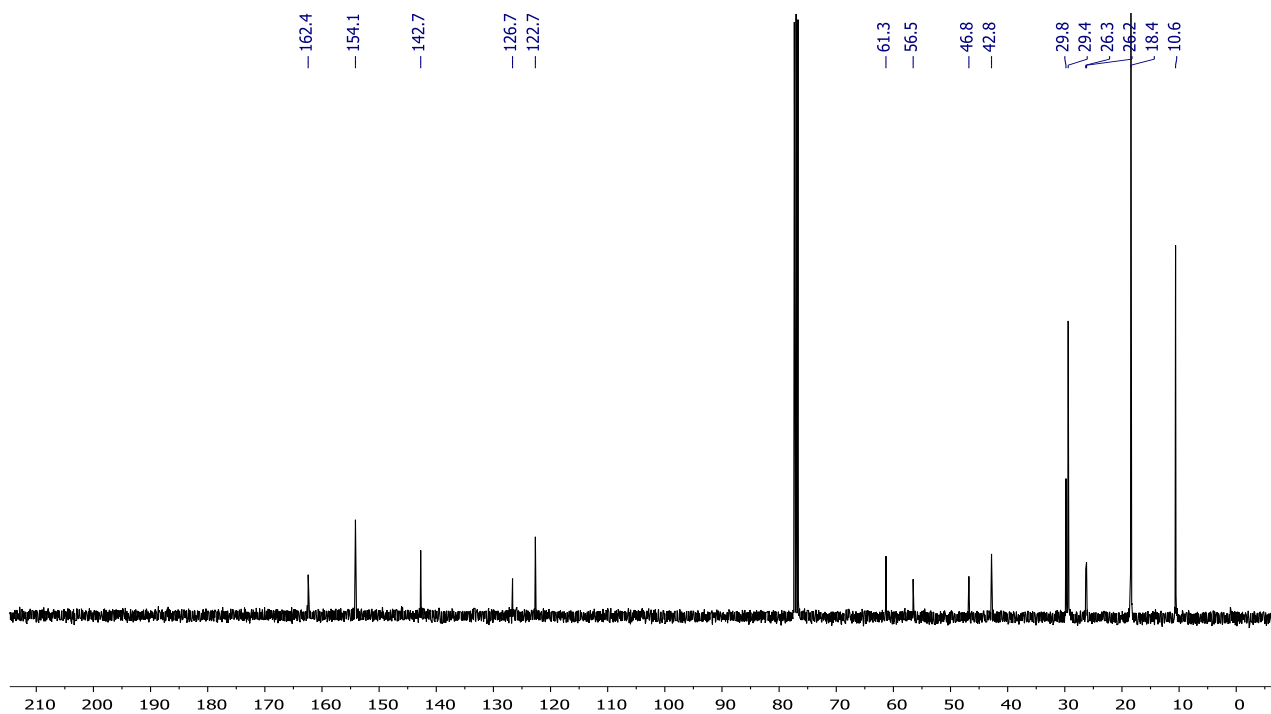

## A2 $^1\text{H}$ and $^{13}\text{C}\{^1\text{H}\}$ NMR spectra of substrates

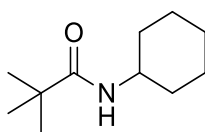

$^1\text{H}$ -NMR of **S8** in  $\text{CDCl}_3$

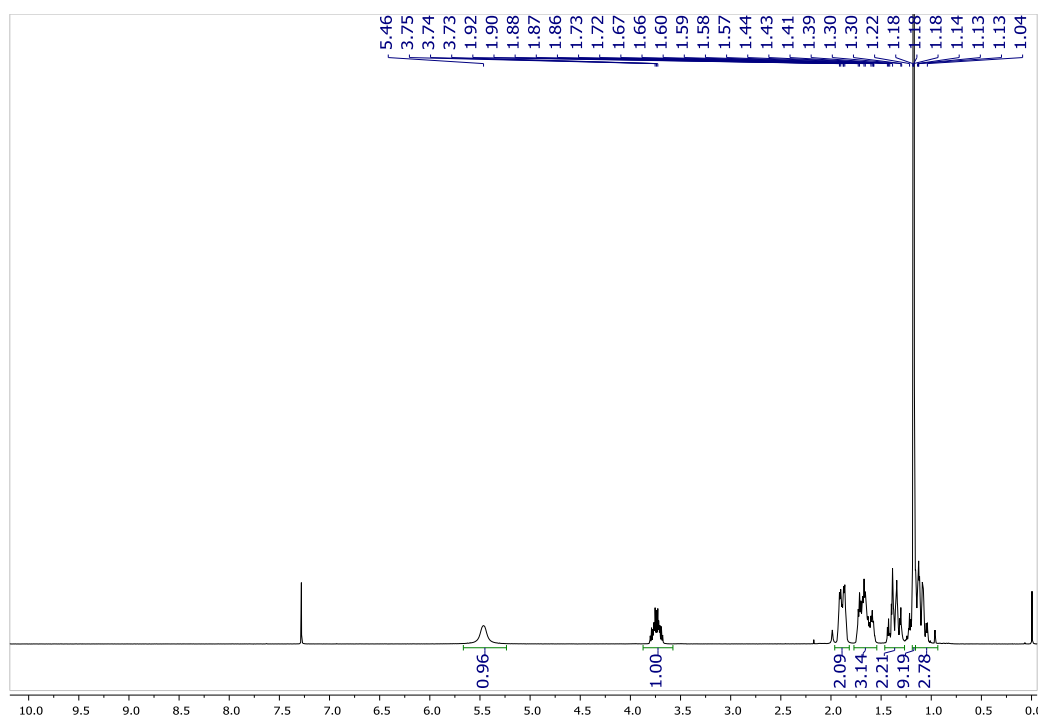

$^{13}\text{C}\{^1\text{H}\}$ -NMR of **S8** in  $\text{CDCl}_3$

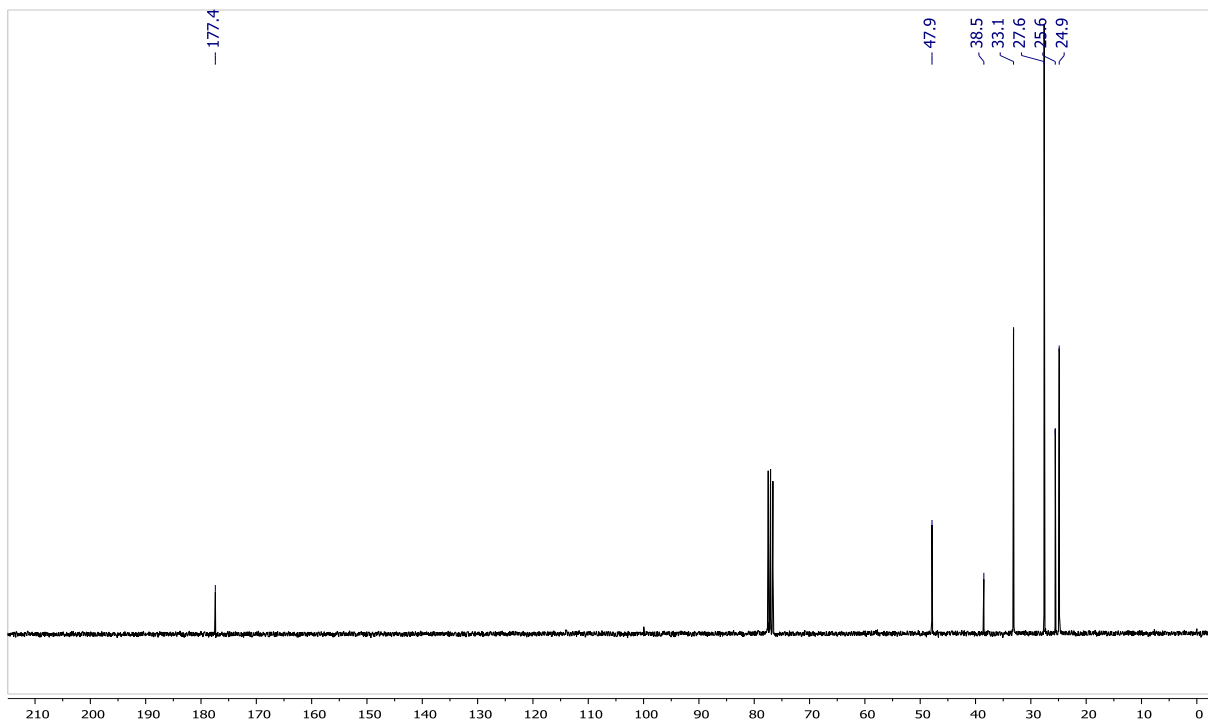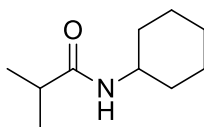

$^1\text{H}$ -NMR of **S9** in  $\text{CDCl}_3$

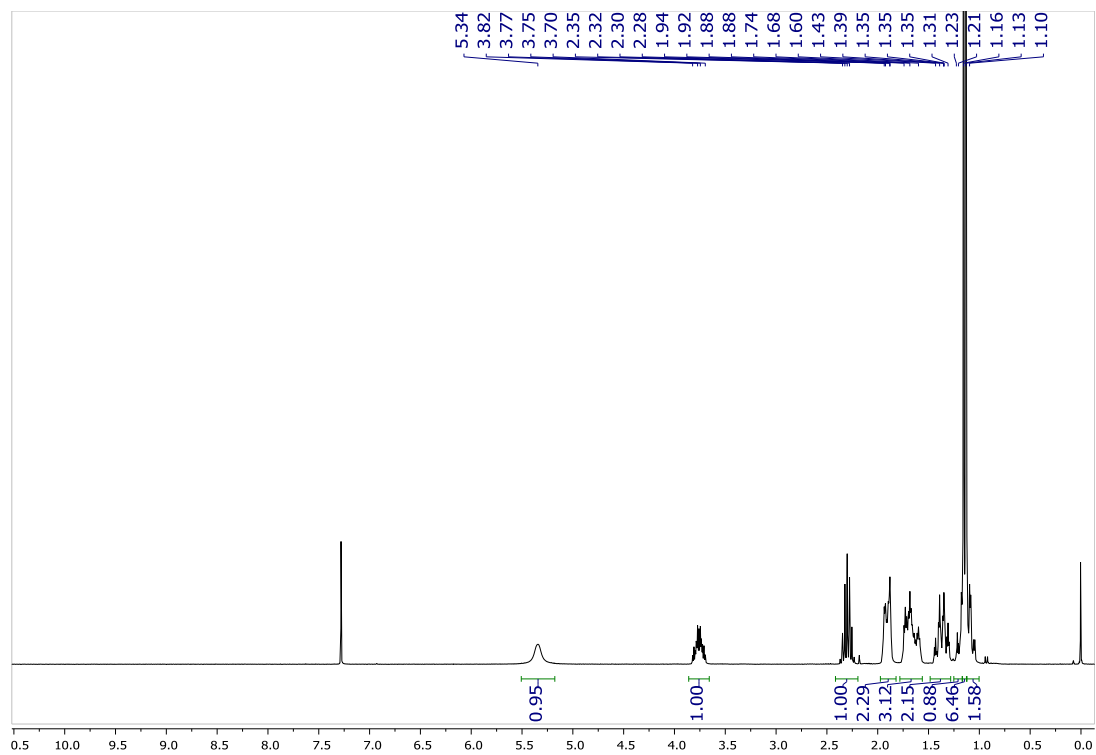

$^{13}\text{C}\{^1\text{H}\}$ -NMR of **S9** in  $\text{CDCl}_3$

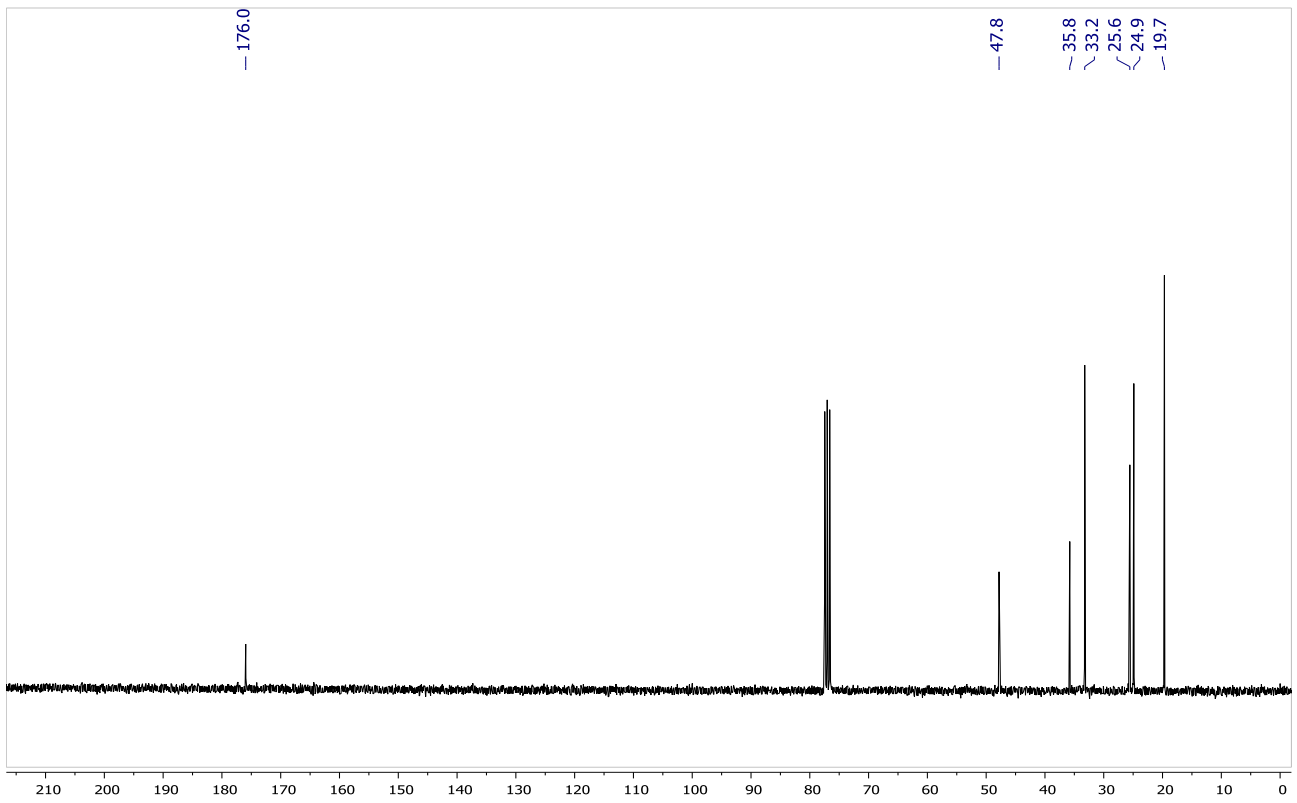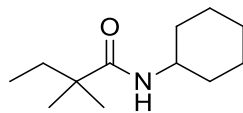

<sup>1</sup>H-NMR of S10 in CDCl<sub>3</sub>

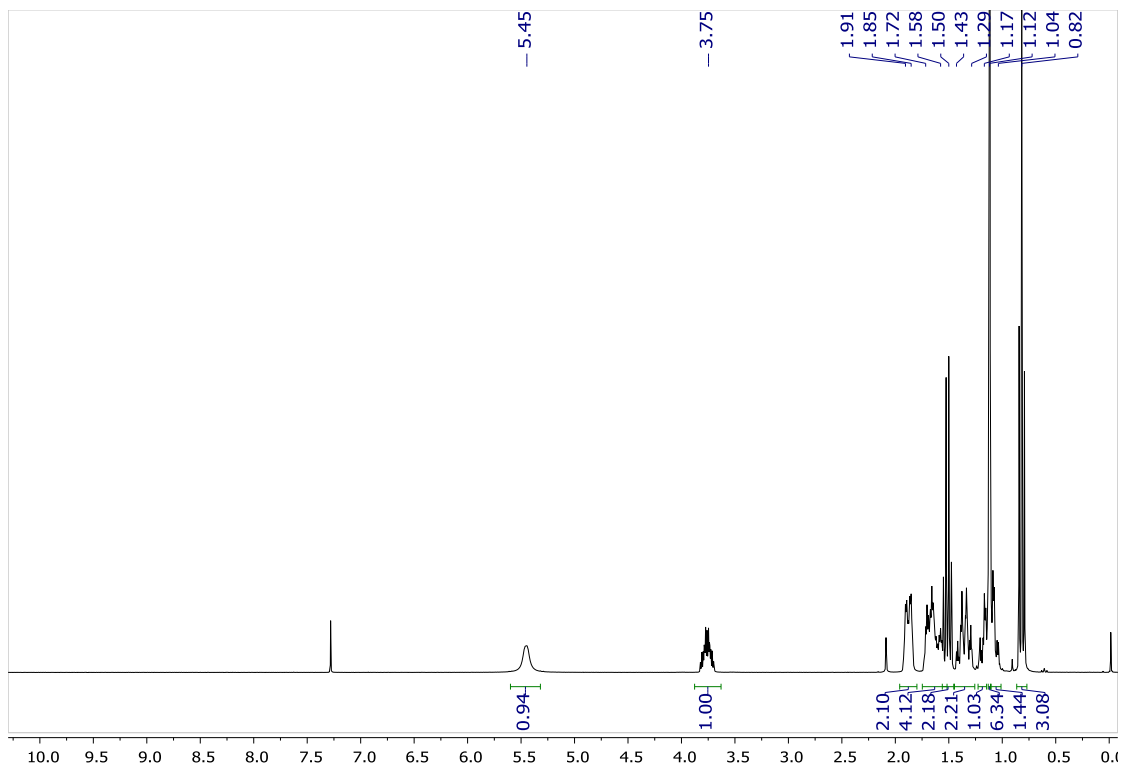

$^{13}\text{C}\{^1\text{H}\}$ -NMR of **S10** in  $\text{CDCl}_3$

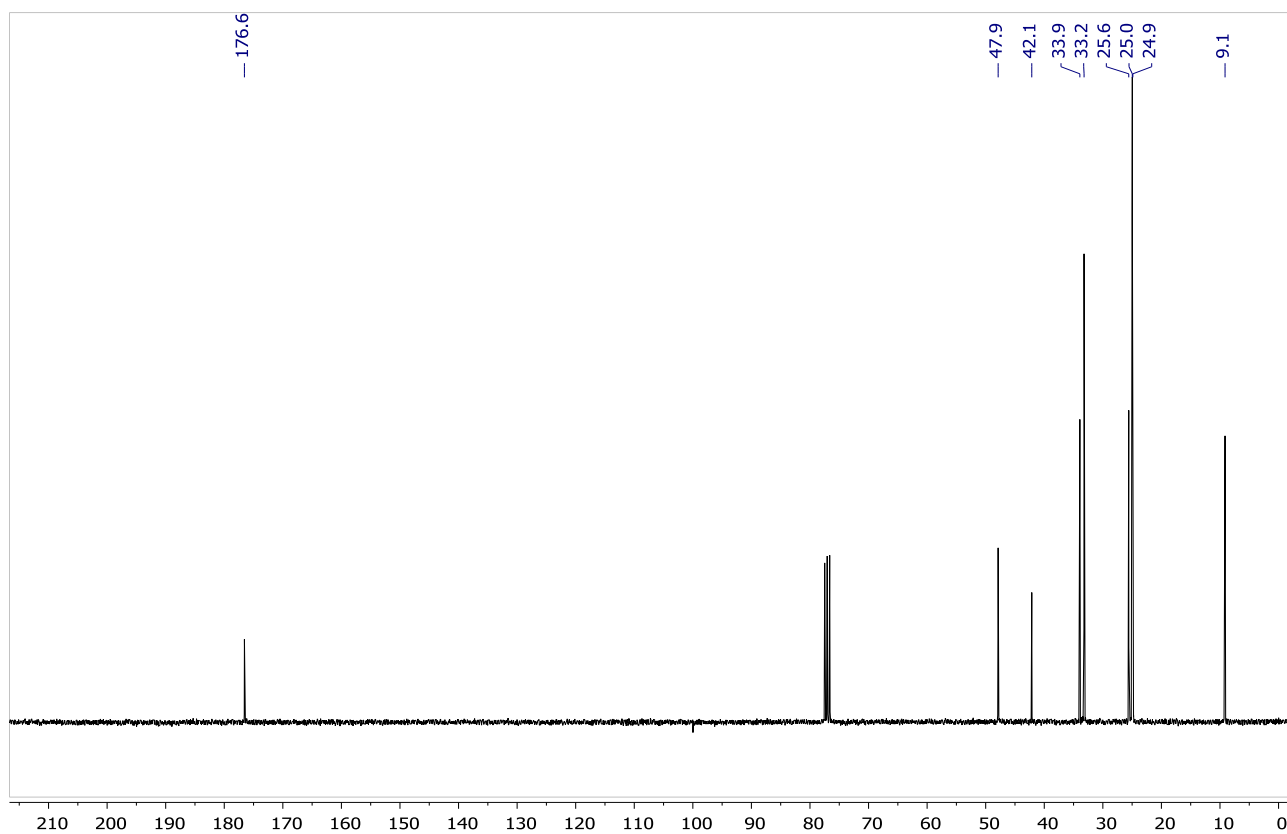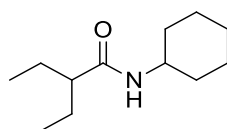

$^1\text{H}$ -NMR of **S11** in  $\text{CDCl}_3$

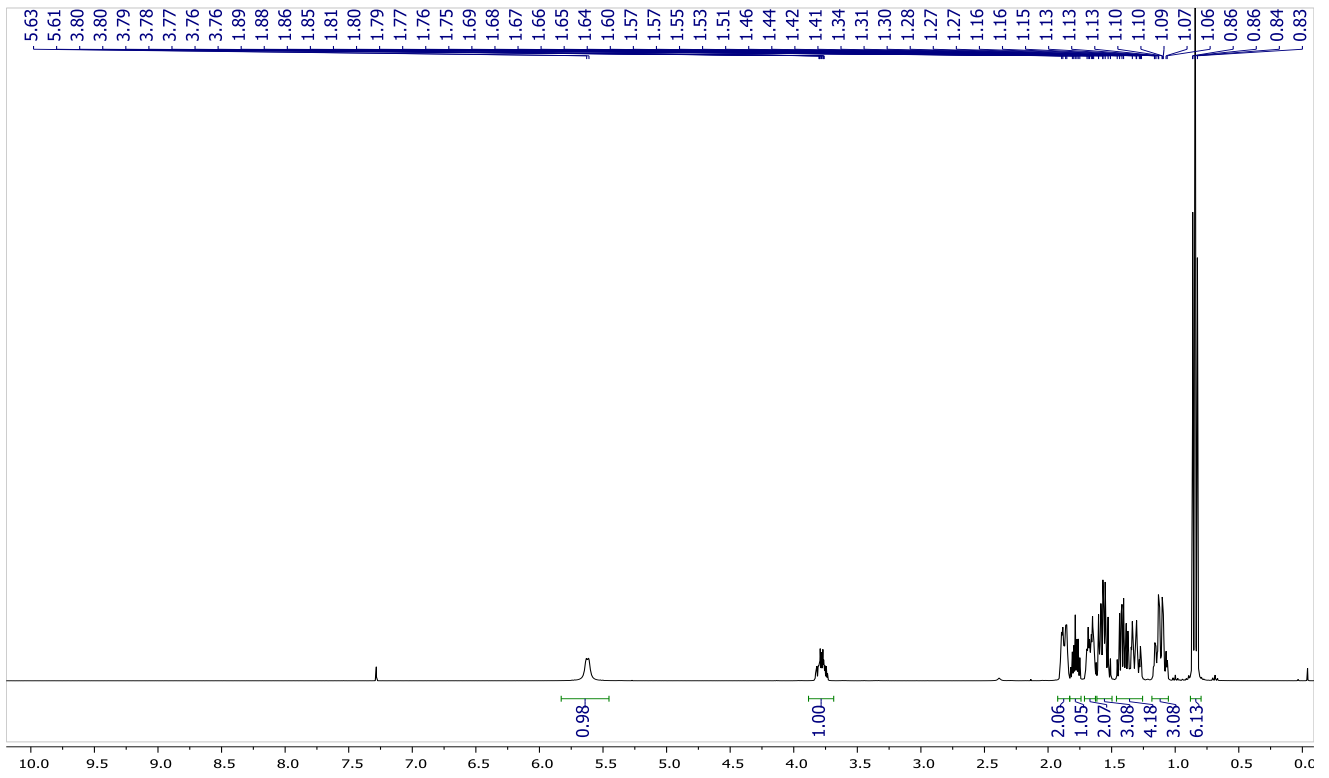

$^{13}\text{C}\{^1\text{H}\}$ -NMR of **S11** in  $\text{CDCl}_3$

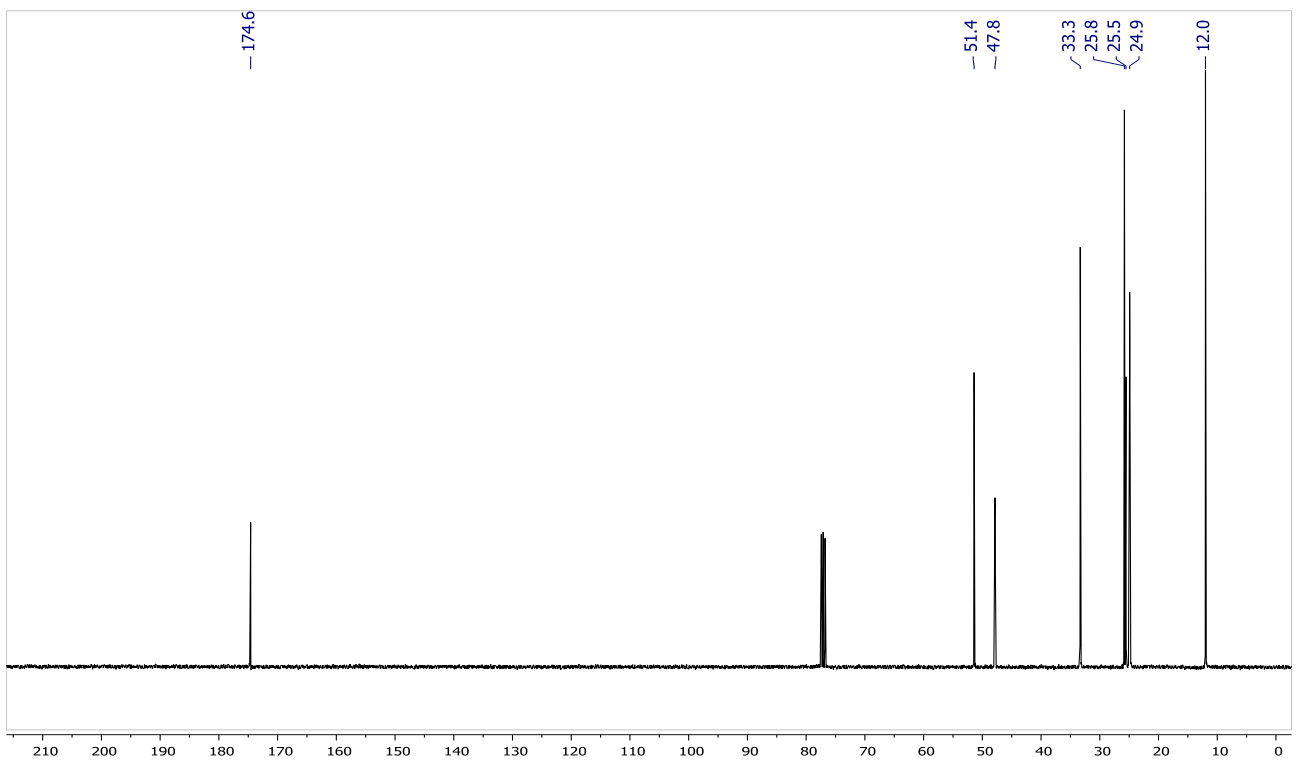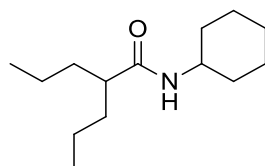



$^1\text{H-NMR}$  of **S12** in  $\text{CDCl}_3$

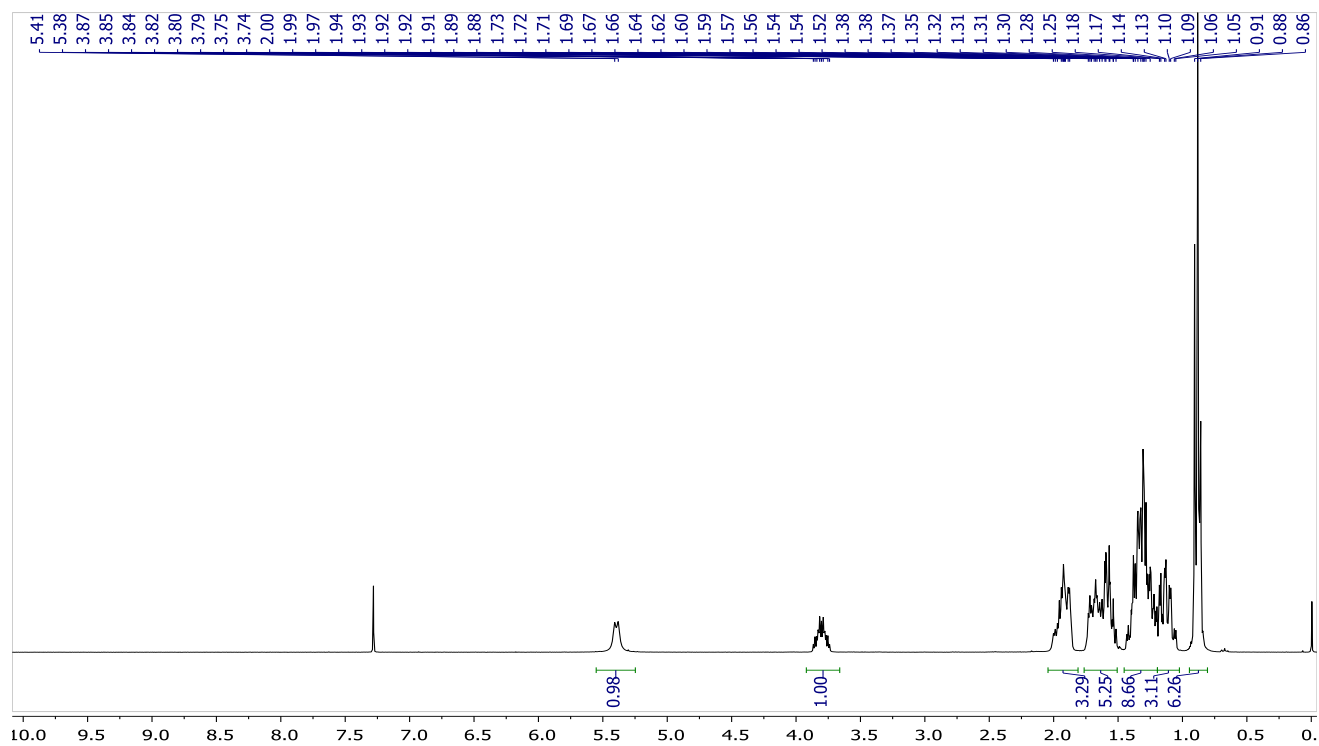

$^{13}\text{C}\{^1\text{H}\}$ -NMR of **S12** in  $\text{CDCl}_3$

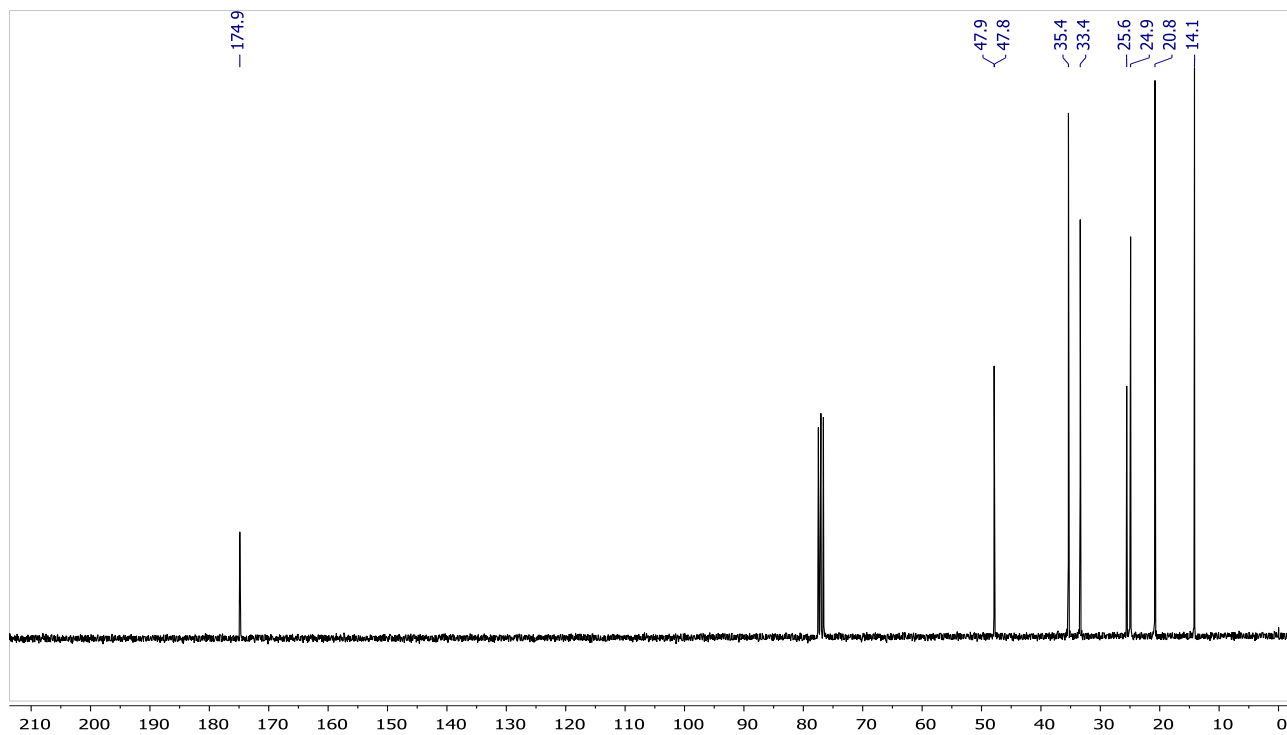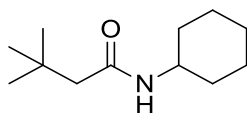

$^1\text{H-NMR}$  of **S13** in  $\text{CDCl}_3$

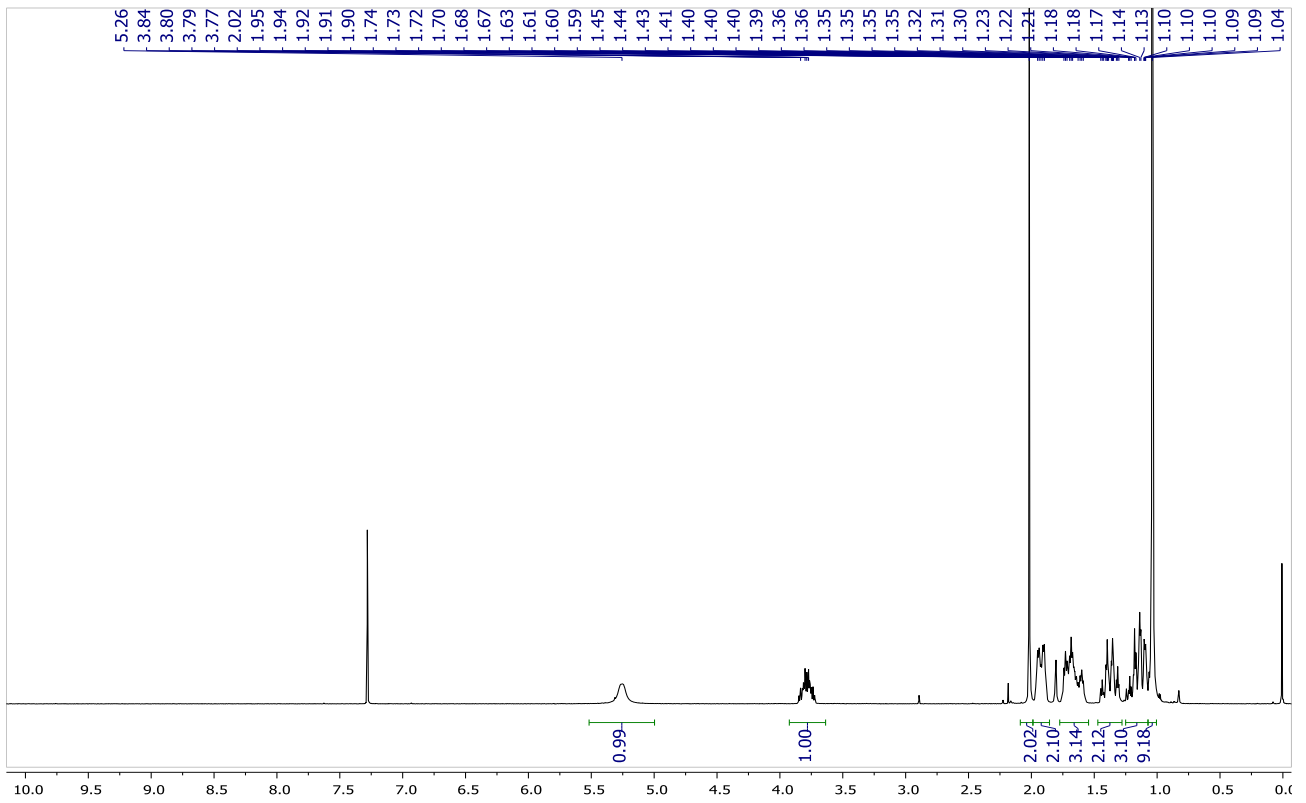

<sup>13</sup>C{<sup>1</sup>H}-NMR of S13 in CDCl<sub>3</sub>

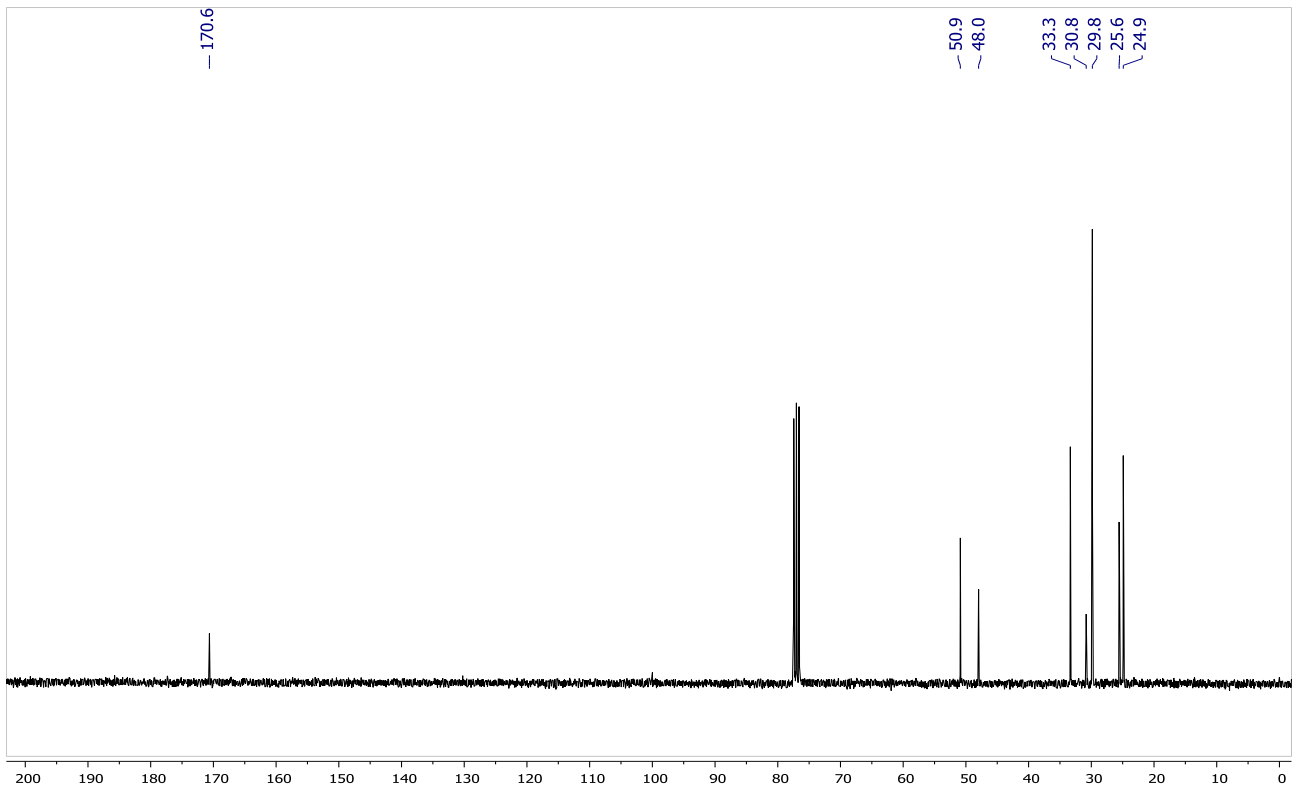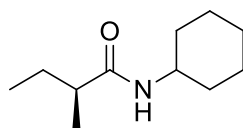

<sup>1</sup>H-NMR of S14 in CDCl<sub>3</sub>

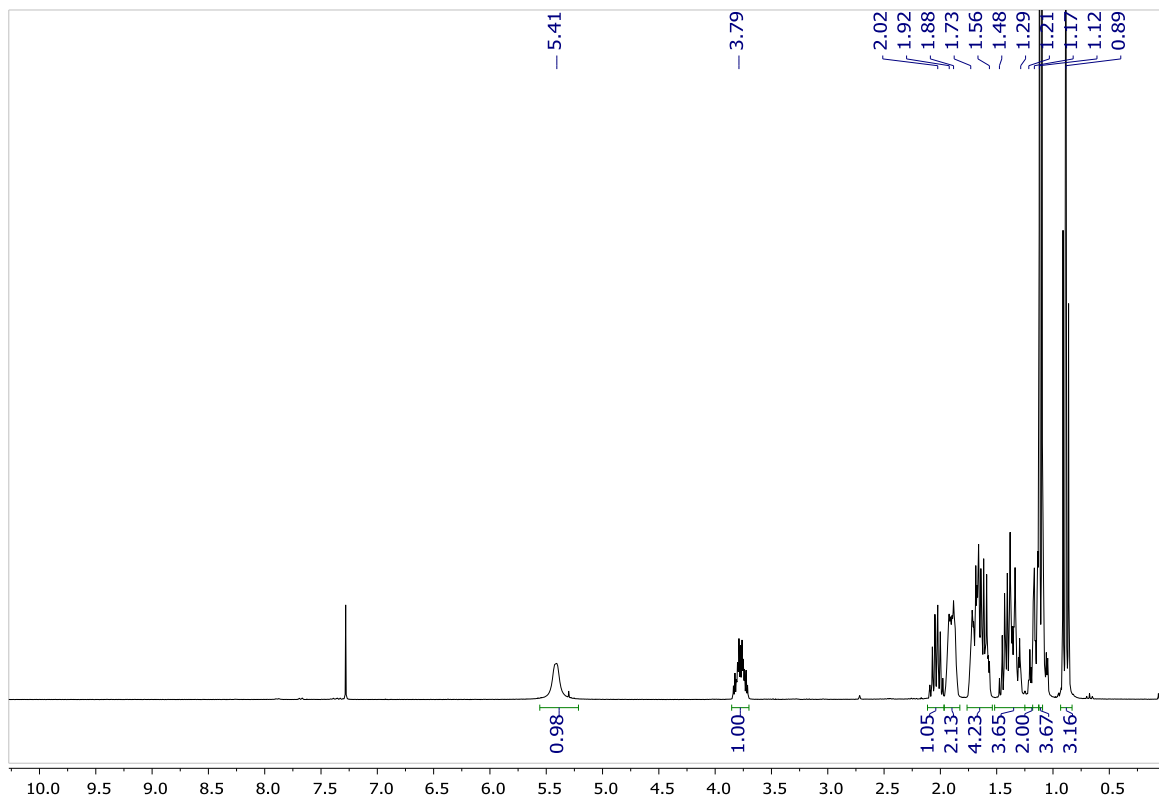

$^{13}\text{C}\{^1\text{H}\}$ -NMR of **S14** in  $\text{CDCl}_3$

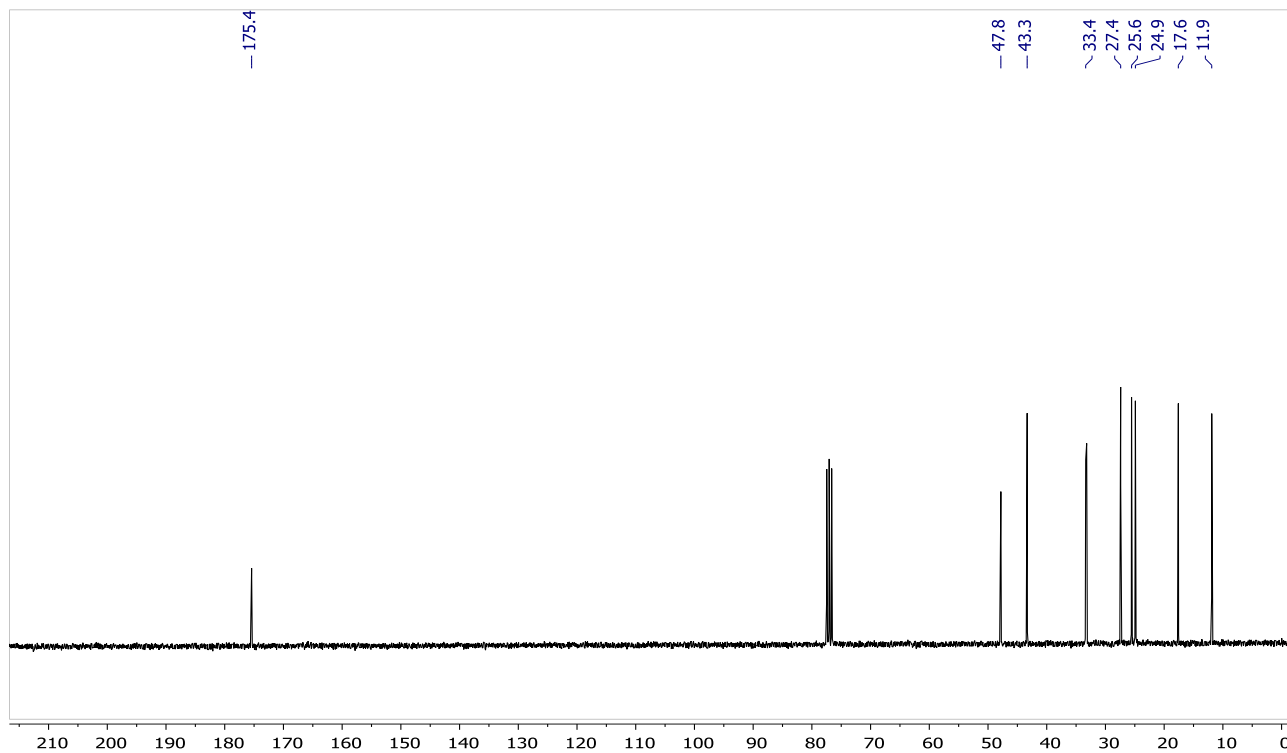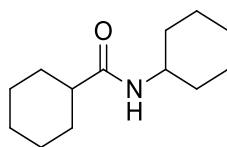

<sup>1</sup>H-NMR of **S15** in CDCl<sub>3</sub>

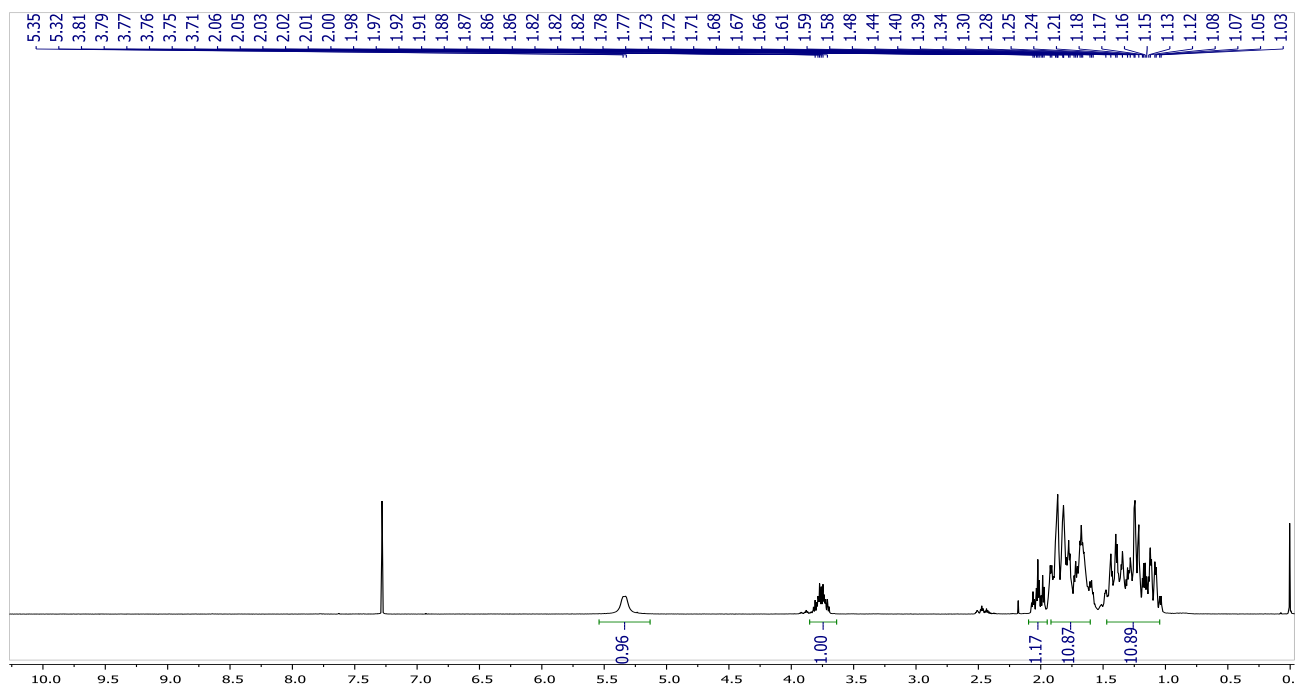

<sup>13</sup>C{<sup>1</sup>H}-NMR of **S15** in CDCl<sub>3</sub>

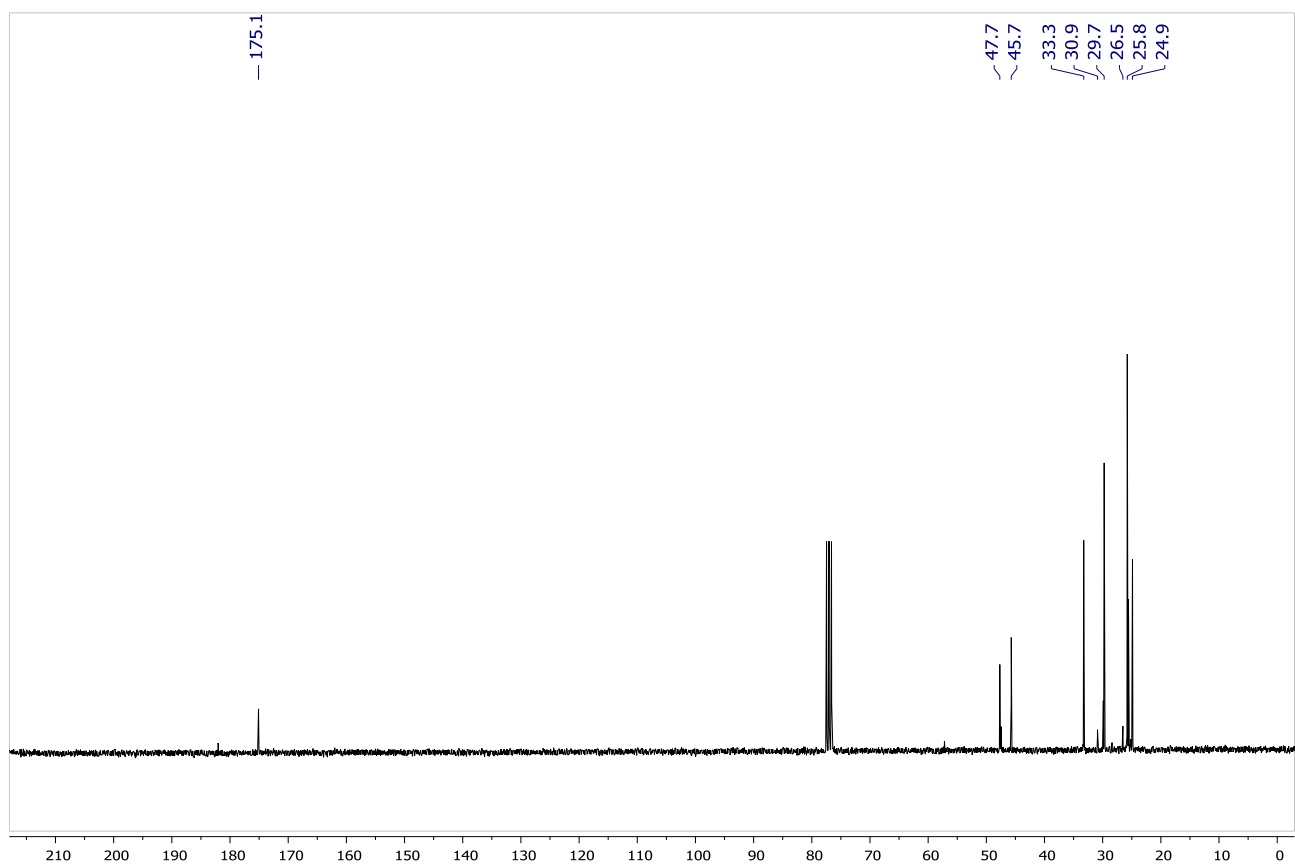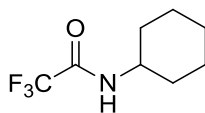

<sup>1</sup>H-NMR of **S17** in CDCl<sub>3</sub>

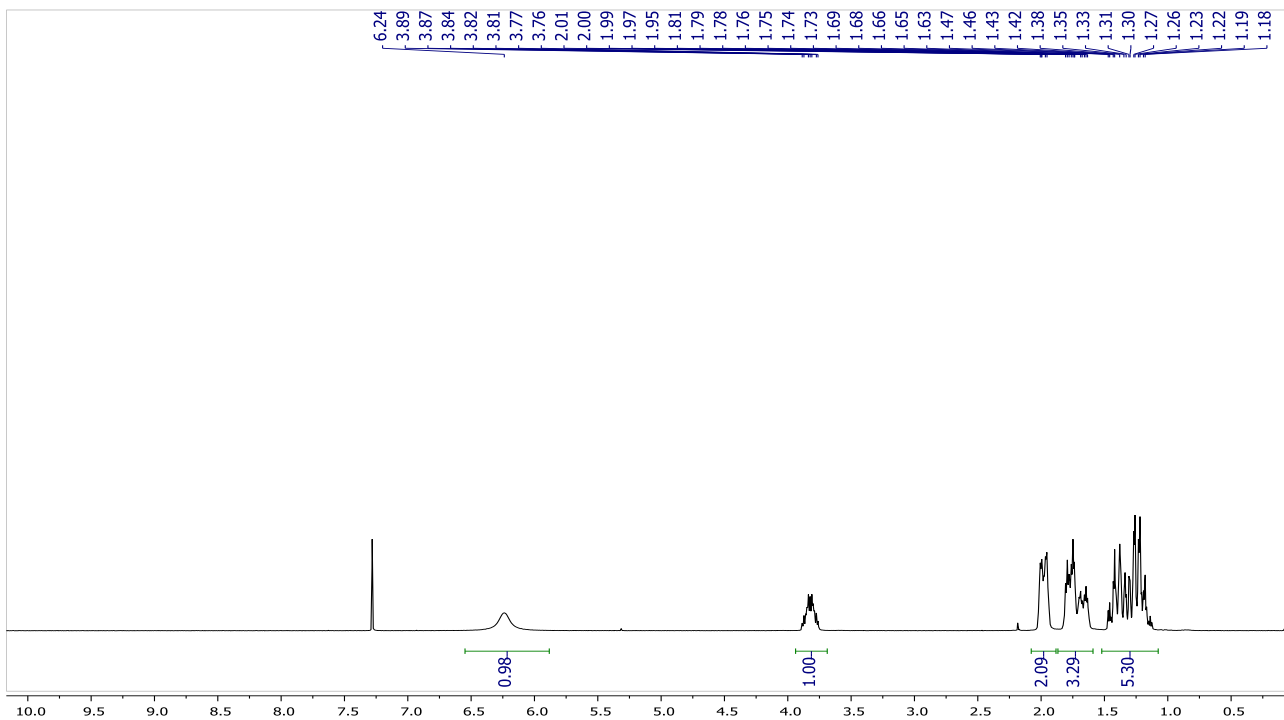

$^{13}\text{C}\{^1\text{H}\}$ -NMR of **S17** in  $\text{CDCl}_3$

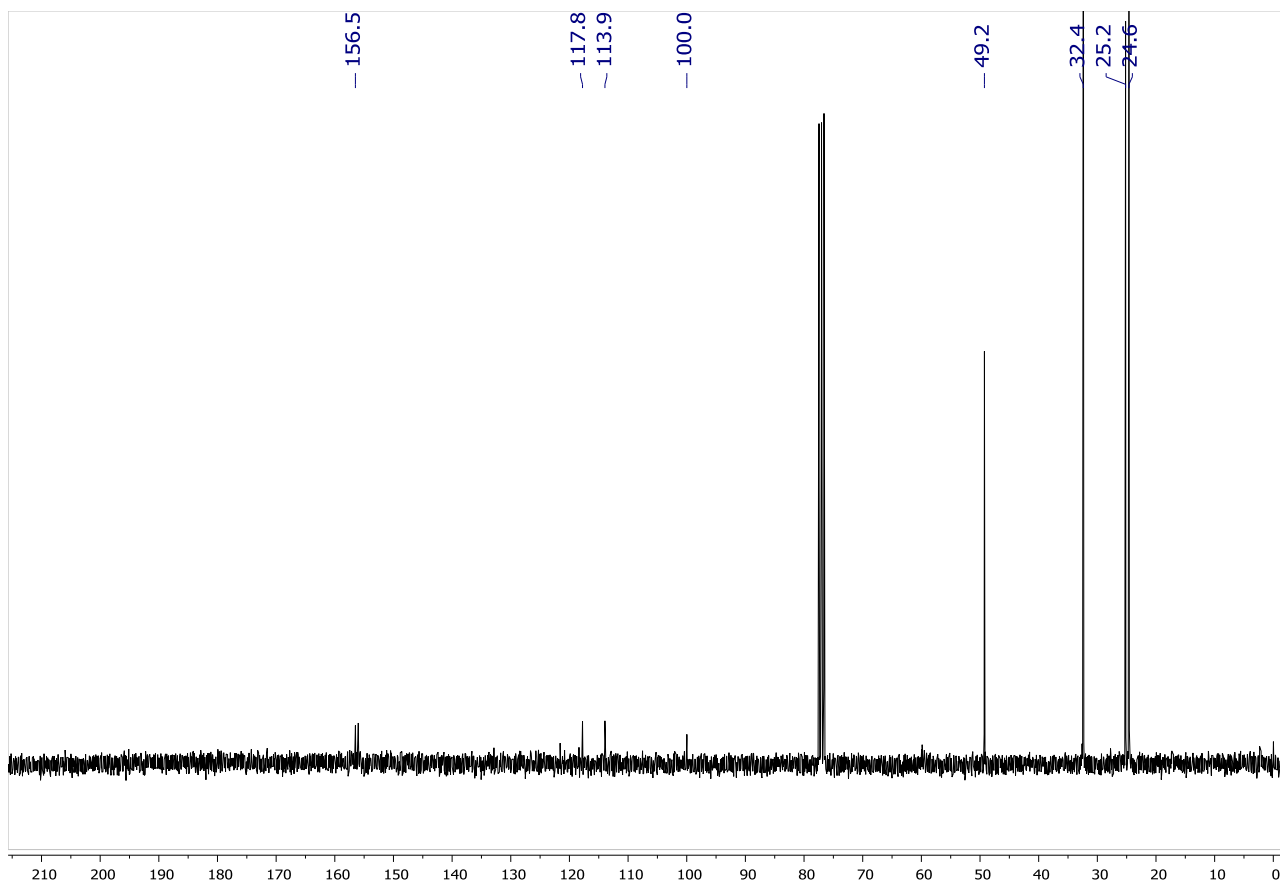

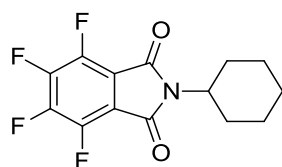

$^1\text{H-NMR}$  of **S19** in  $\text{CDCl}_3$

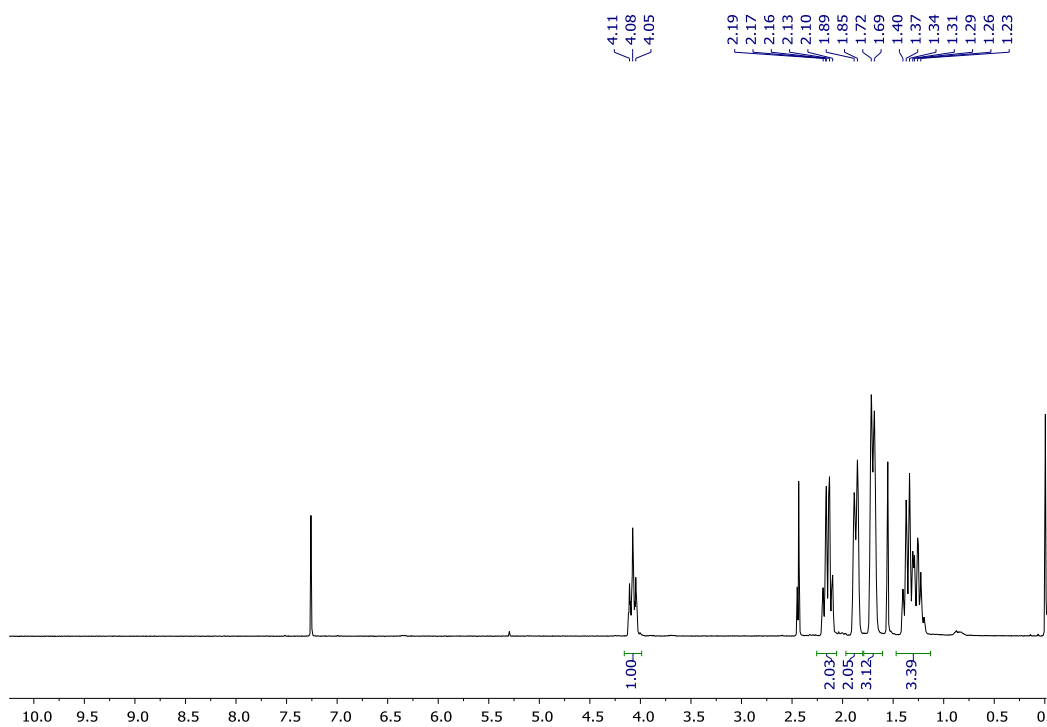

$^{13}\text{C}\{^1\text{H}\}$ -NMR of **S19** in  $\text{CDCl}_3$

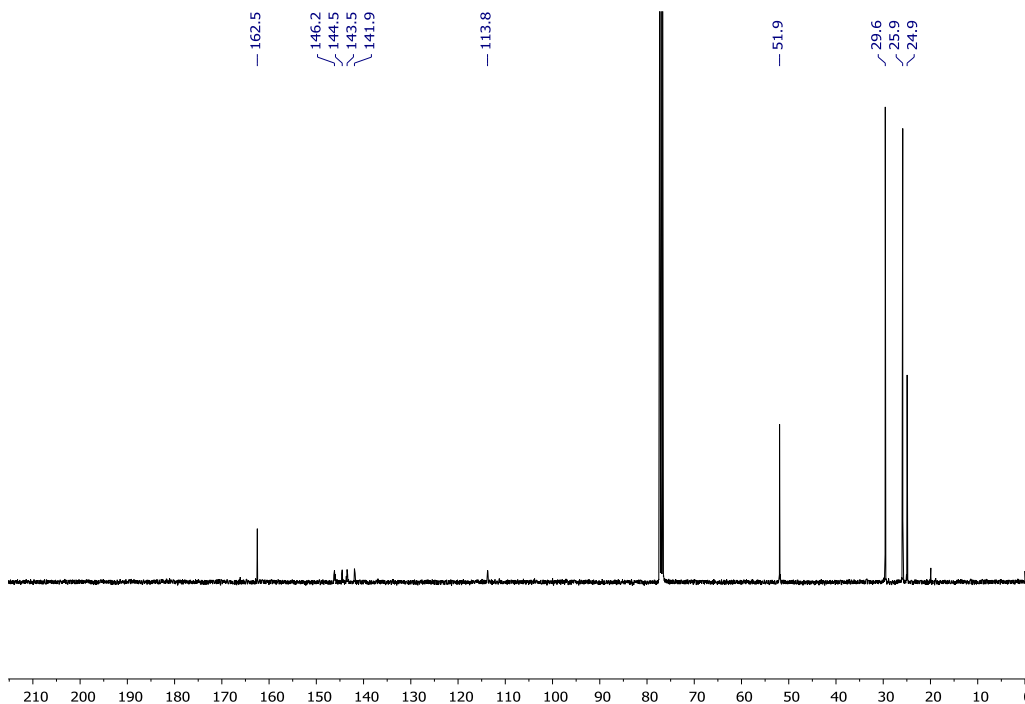

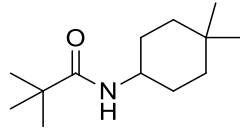

$^1\text{H-NMR}$  of **S20** in  $\text{CDCl}_3$

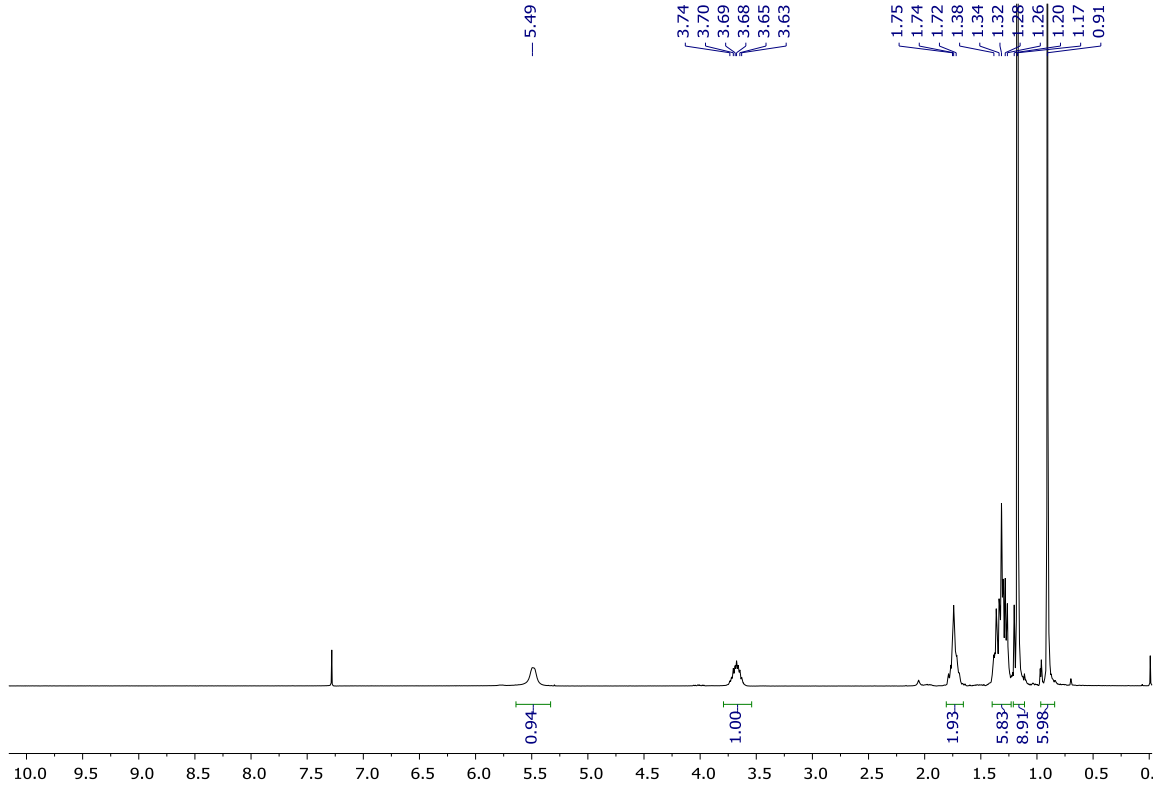

$^{13}\text{C}\{^1\text{H}\}$ -NMR of **S20** in  $\text{CDCl}_3$

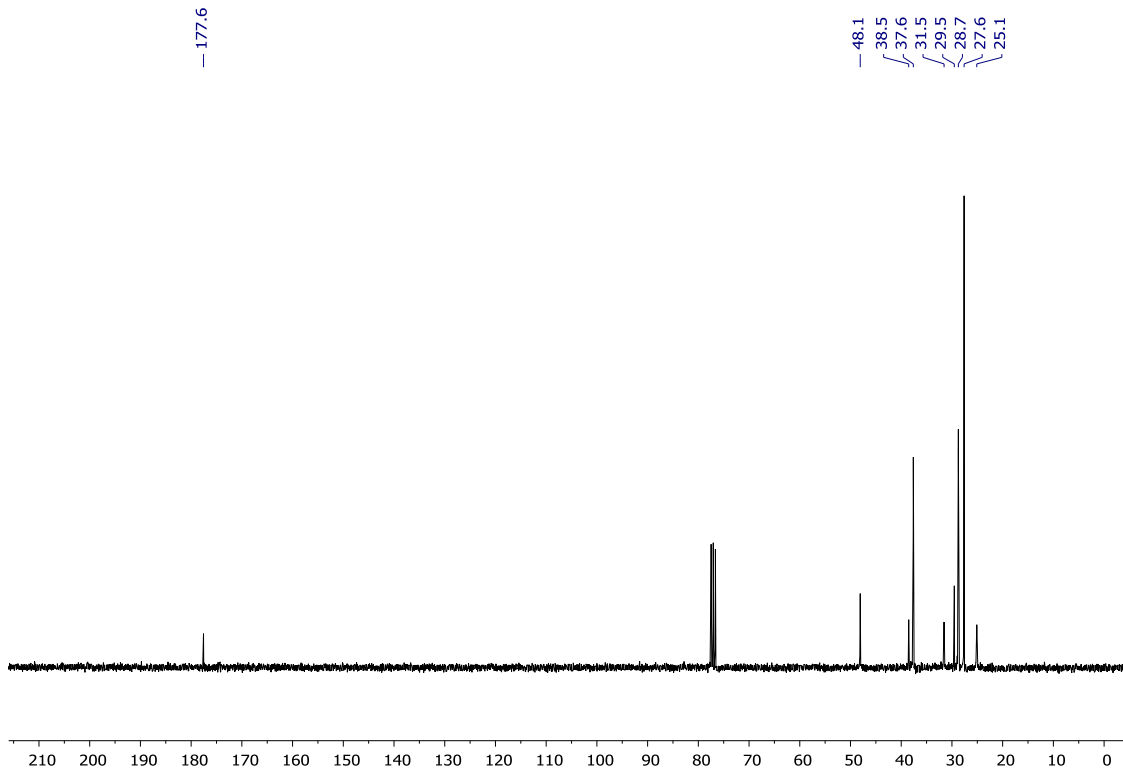

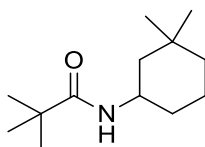

$^1\text{H-NMR}$  of **S21** in  $\text{CDCl}_3$

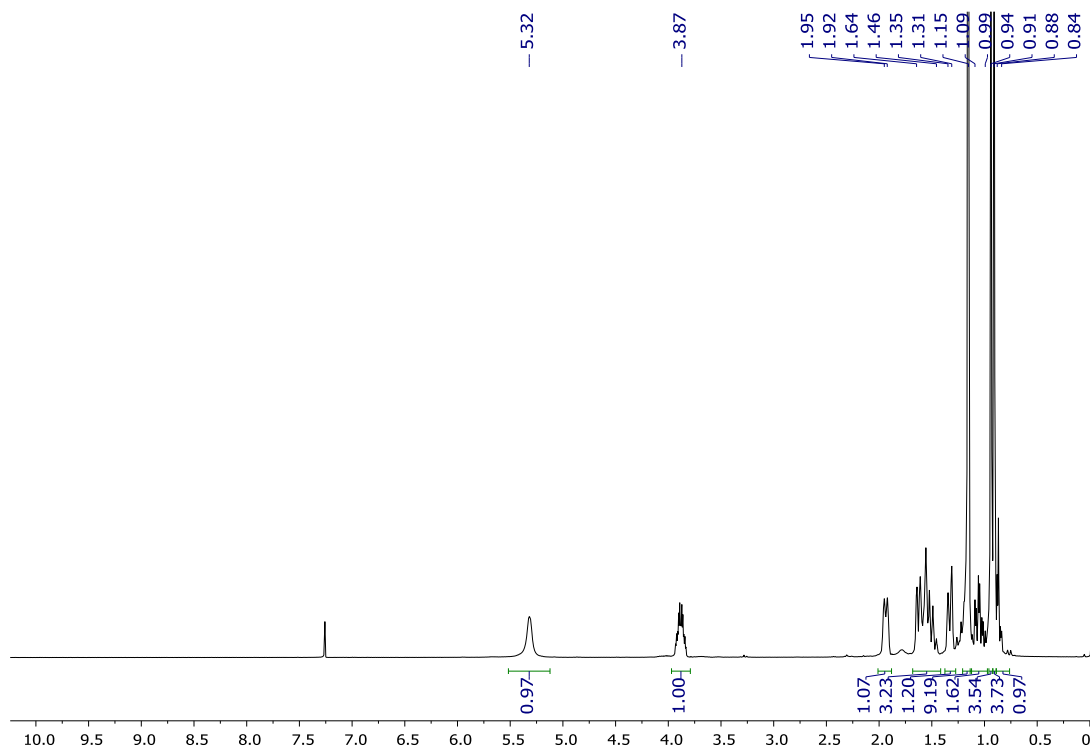

$^{13}\text{C}\{^1\text{H}\}$ -NMR of **S21** in  $\text{CDCl}_3$

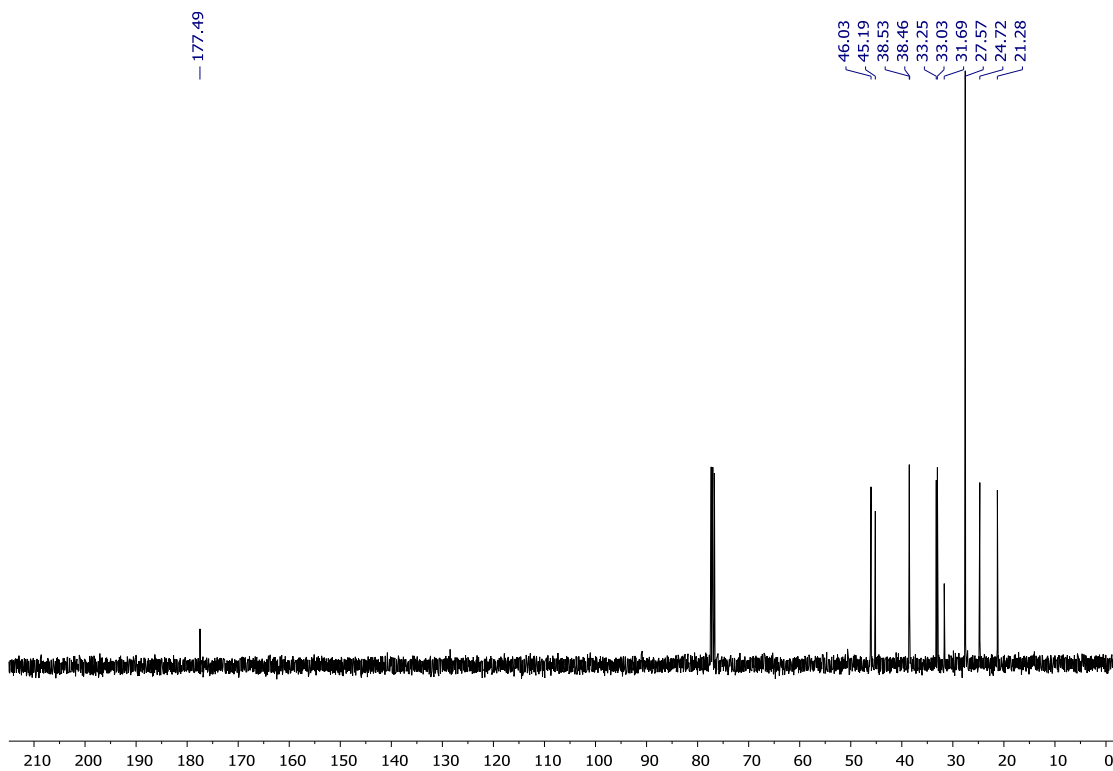



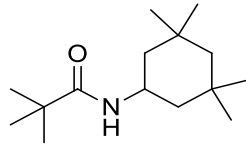

$^1\text{H-NMR}$  of **S22** in  $\text{CDCl}_3$

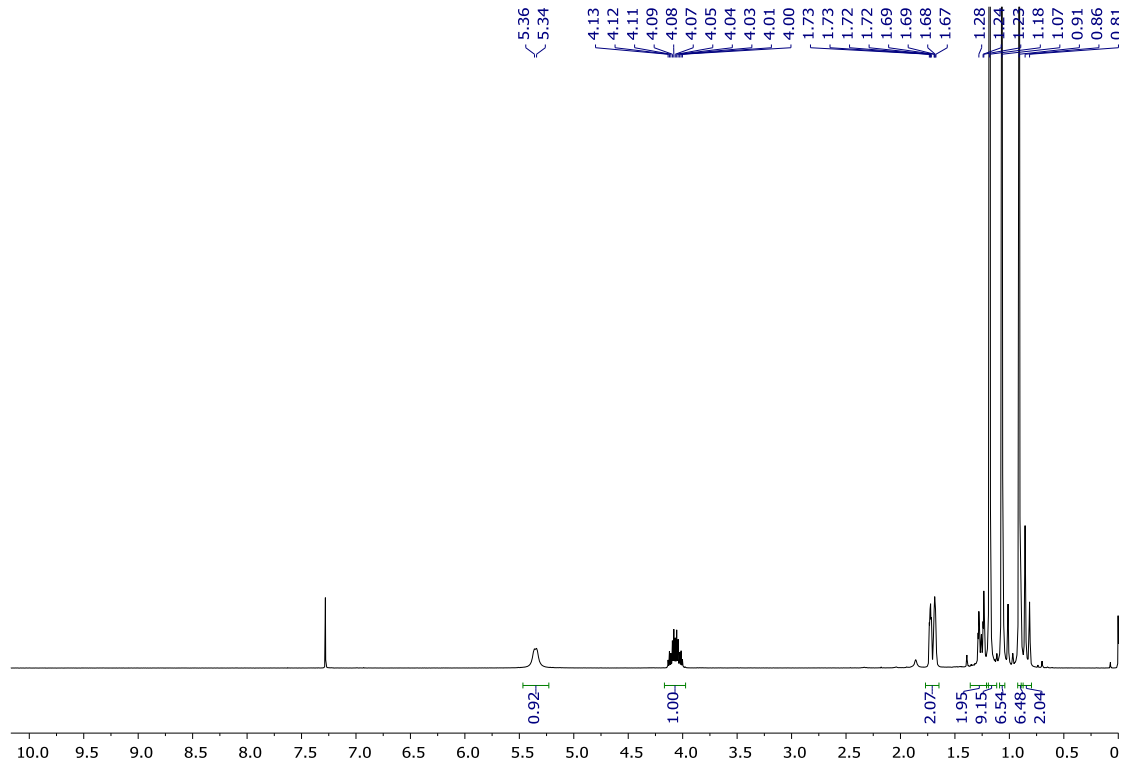

$^{13}\text{C}\{^1\text{H}\}$ -NMR of **S22** in  $\text{CDCl}_3$

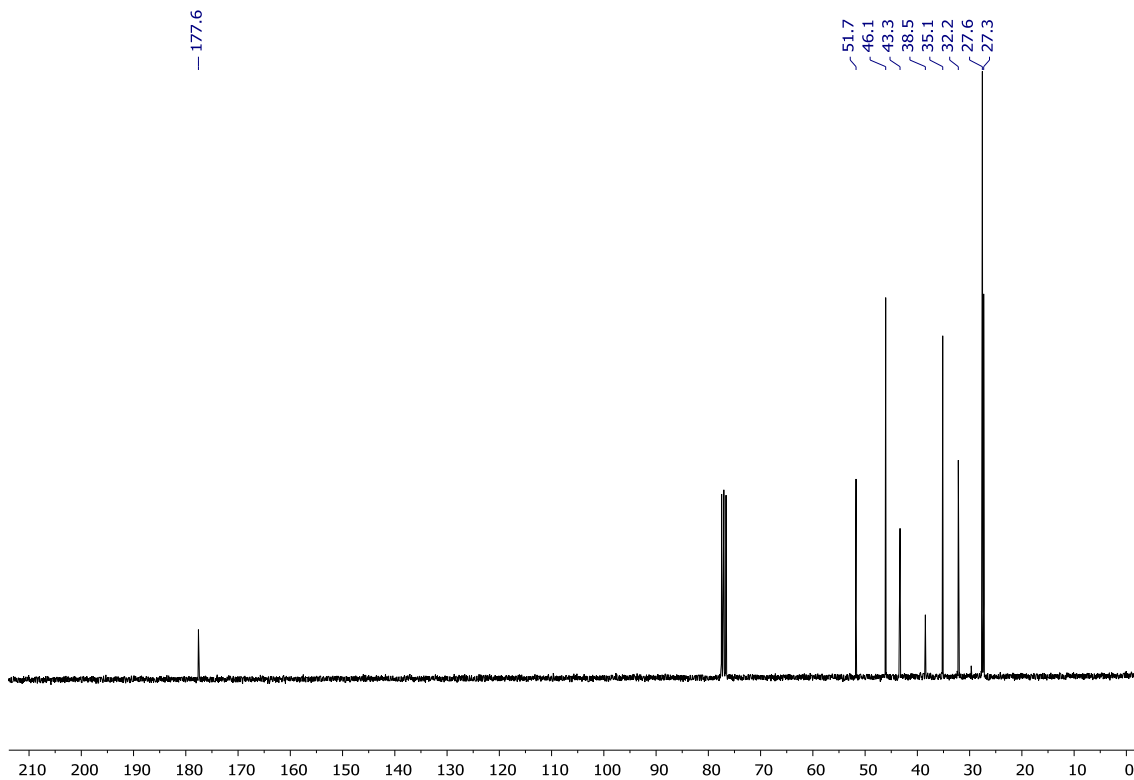

### A3 $^1\text{H}$ and $^{13}\text{C}\{^1\text{H}\}$ NMR spectra of isolated products

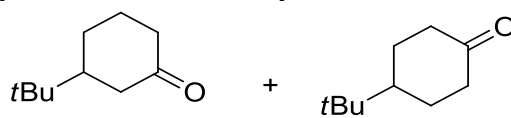

$^1\text{H}$ -NMR of P1 ( $\text{K}_3+\text{K}_4$ ) in  $\text{CDCl}_3$

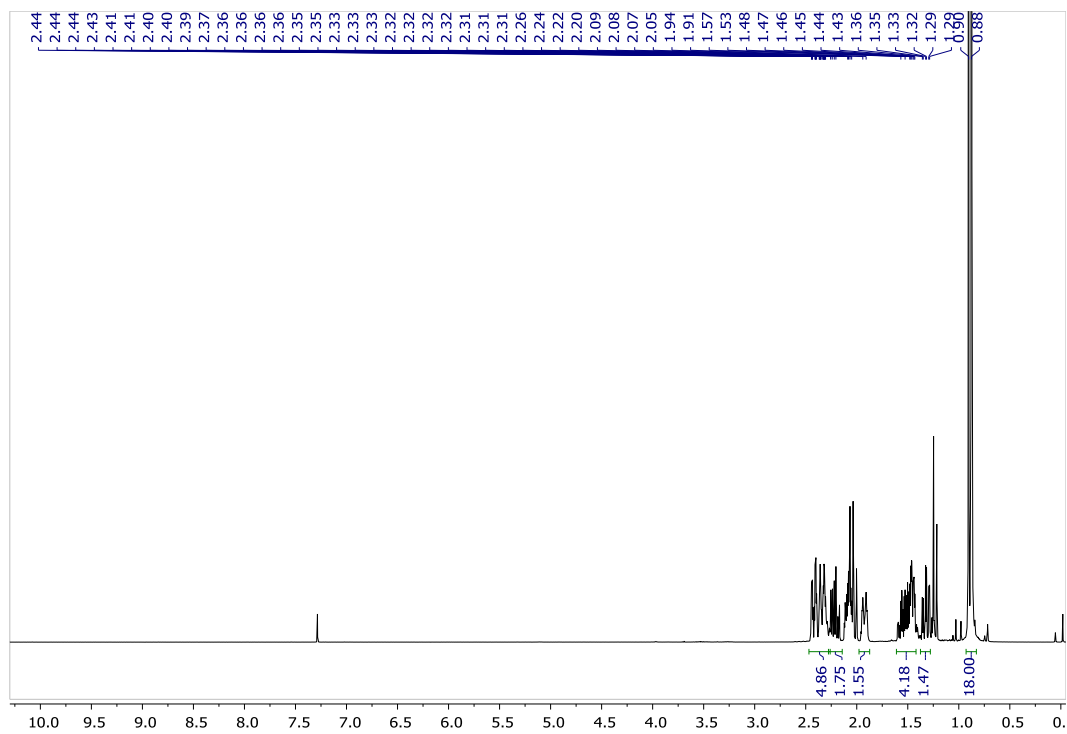

$^{13}\text{C}\{^1\text{H}\}$ -NMR of P1 ( $\text{K}_3+\text{K}_4$ ) in  $\text{CDCl}_3$

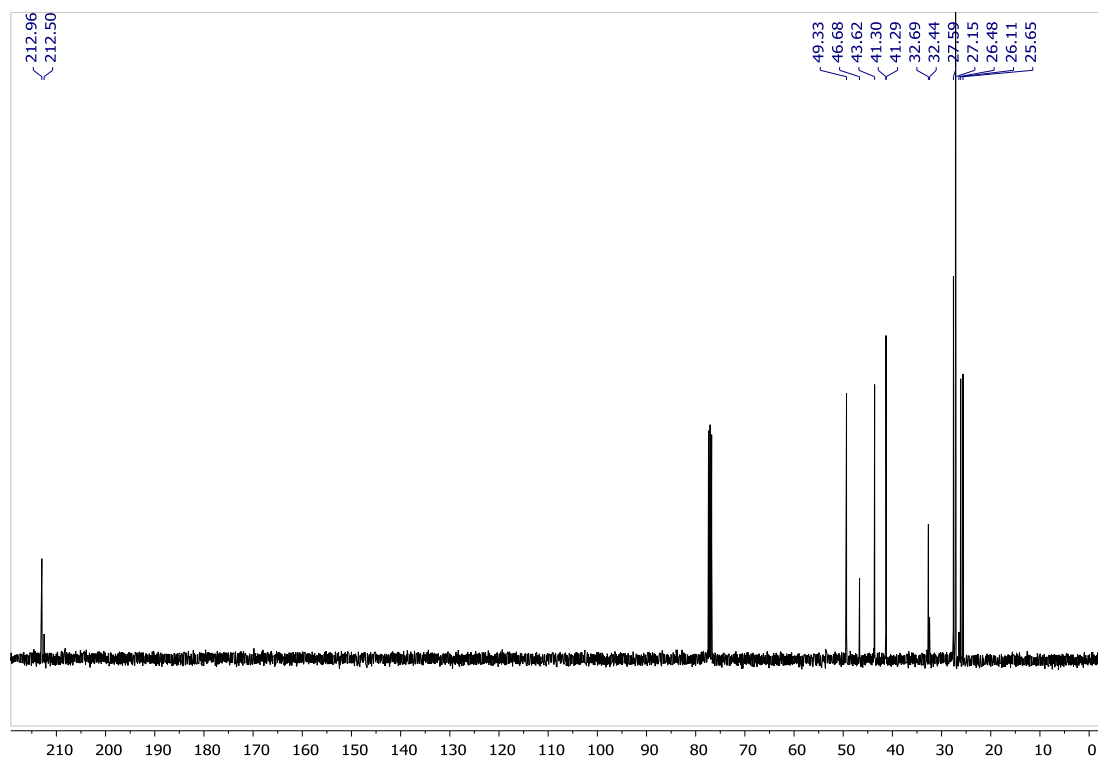

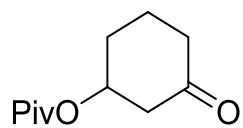

$^1\text{H-NMR}$  of **P2 (K<sub>3</sub>)** in  $\text{CDCl}_3$

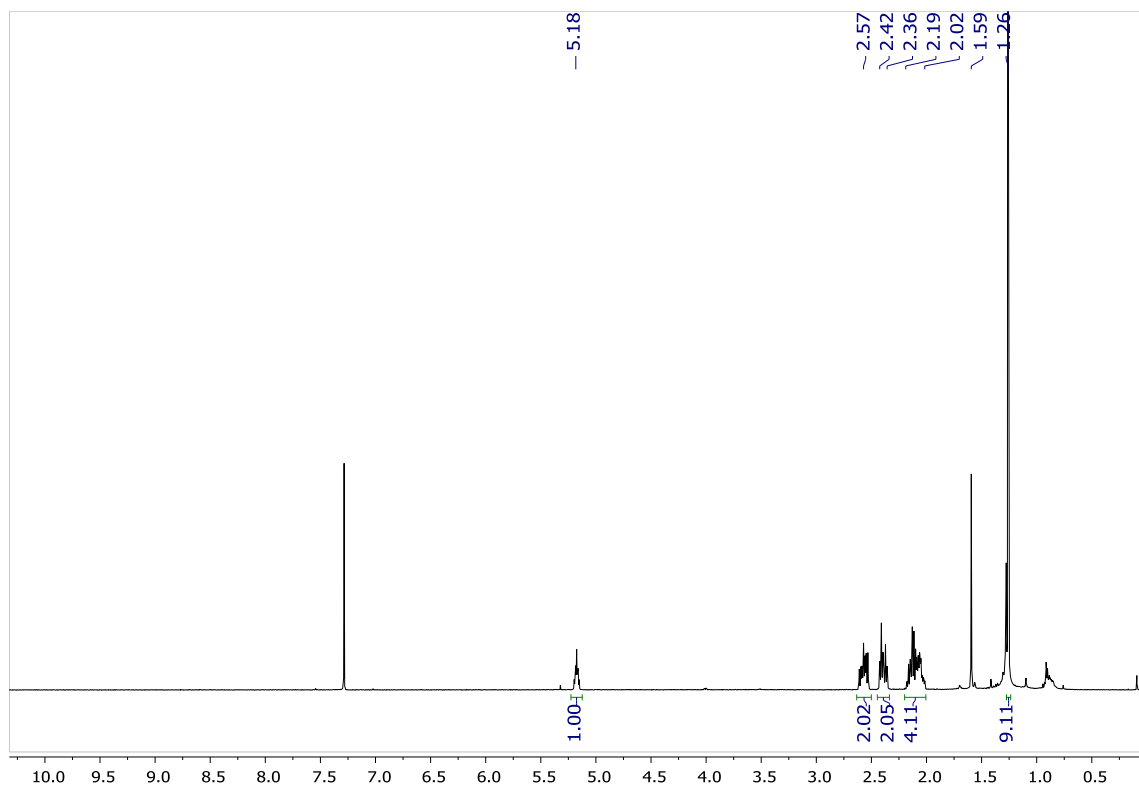

$^{13}\text{C}\{^1\text{H}\}$ -NMR of **P2 (K<sub>3</sub>)** in  $\text{CDCl}_3$

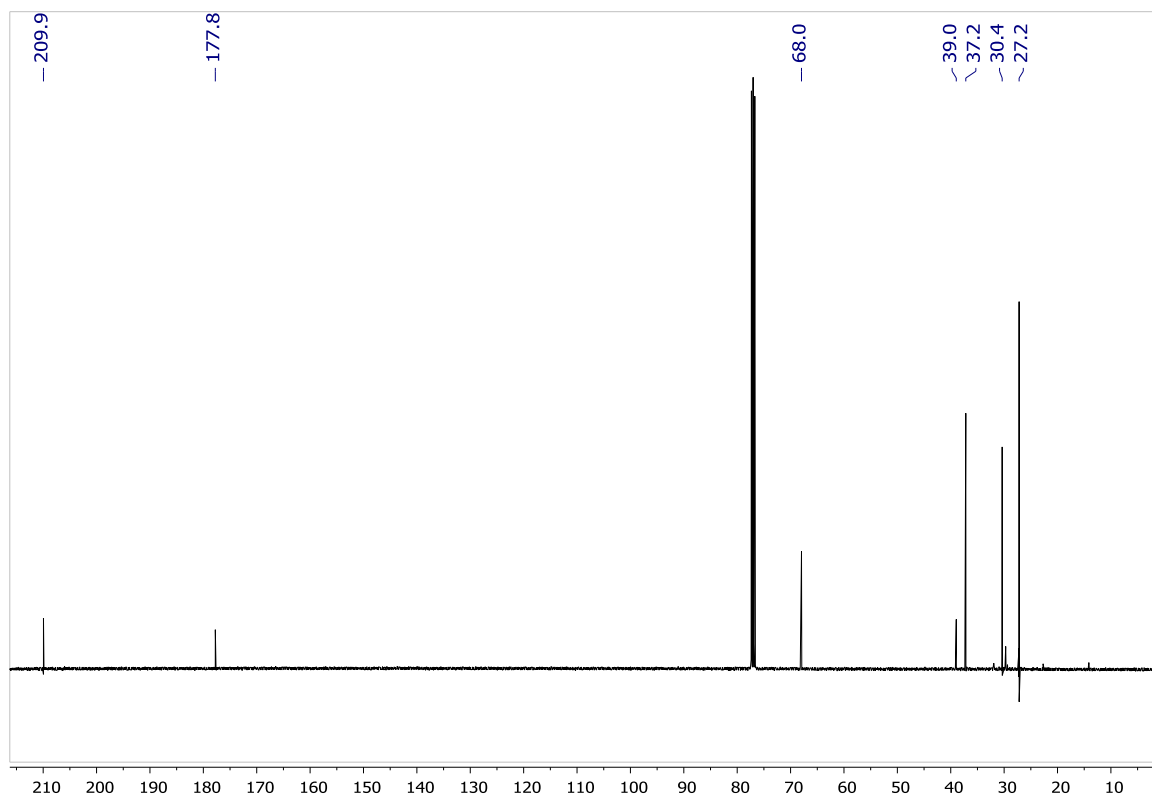

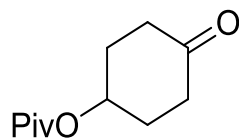

$^1\text{H-NMR}$  of **P2 (K<sub>4</sub>)** in  $\text{CDCl}_3$

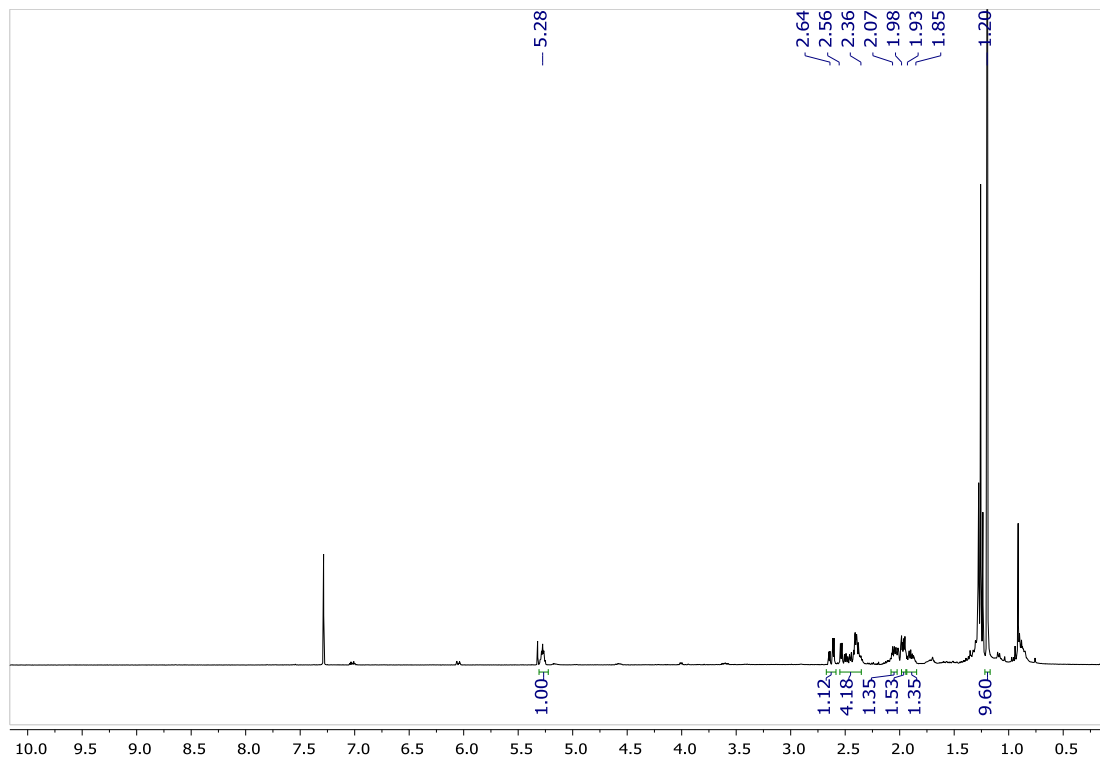

$^{13}\text{C}\{^1\text{H}\}$ -NMR of **P2 (K<sub>4</sub>)** in  $\text{CDCl}_3$

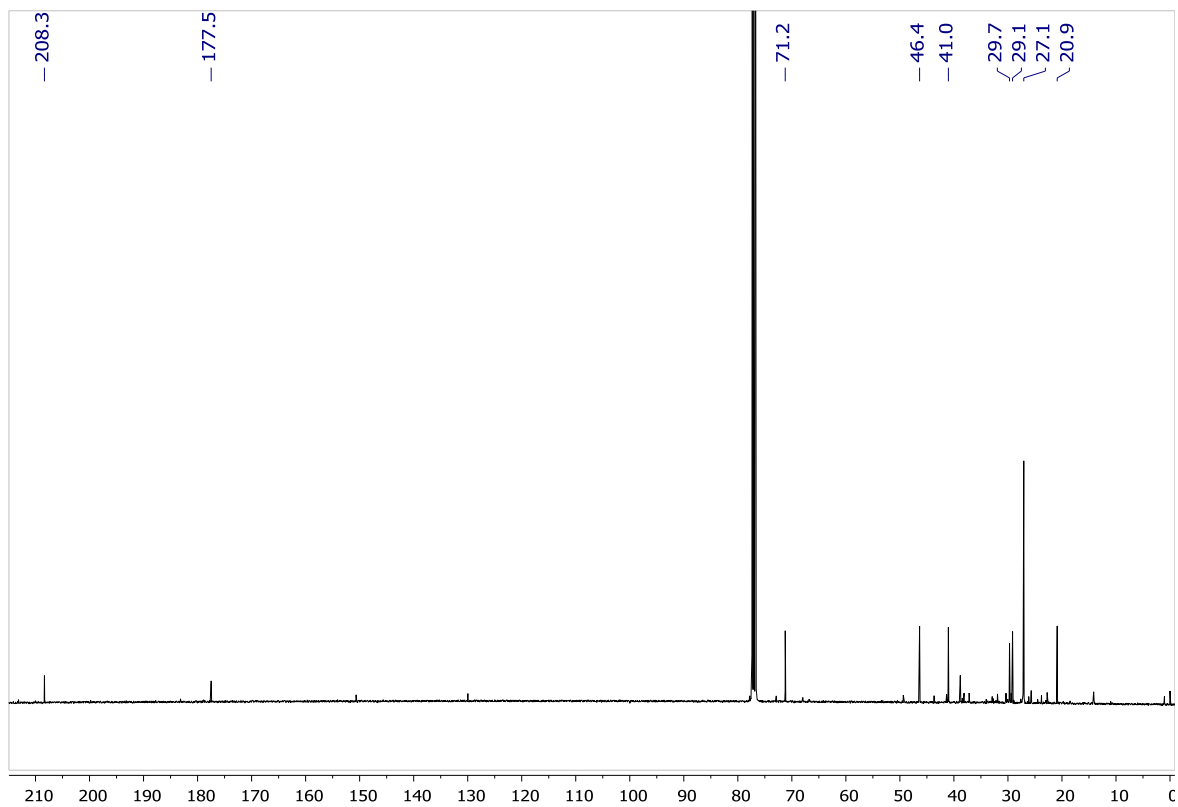

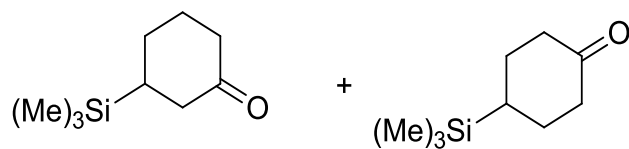

$^1\text{H-NMR}$  of **P3** ( $\text{K}_3+\text{K}_4$ ) in  $\text{CDCl}_3$

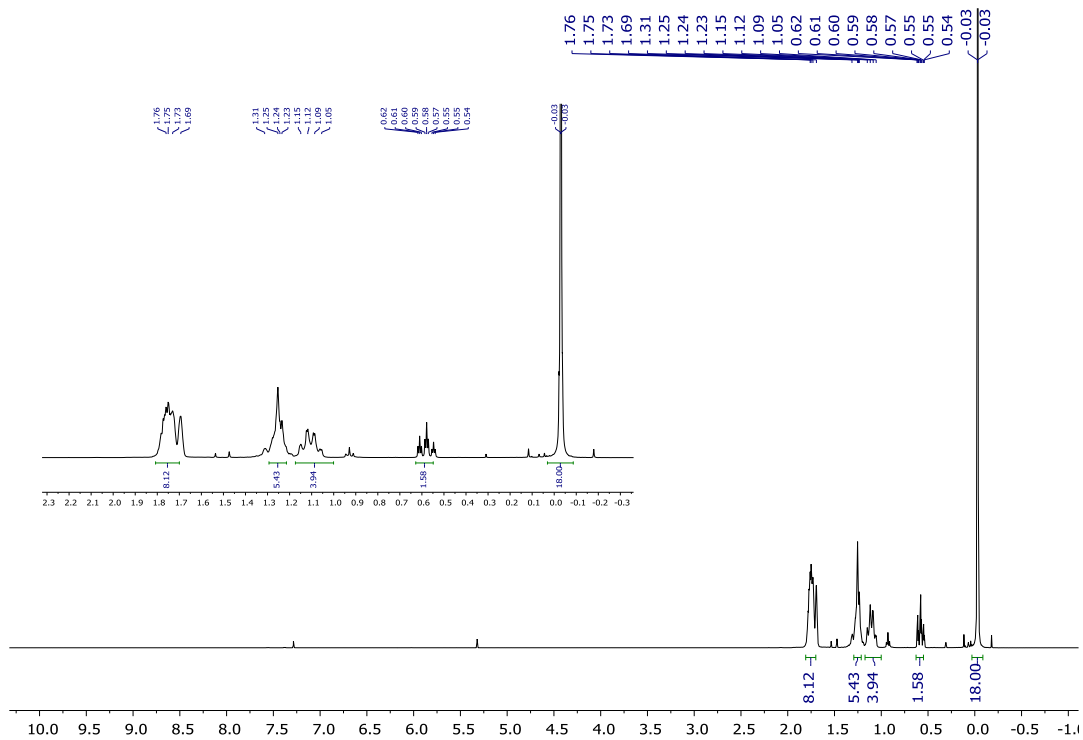

$^{13}\text{C}\{^1\text{H}\}$ -NMR of **P3** ( $\text{K}_3+\text{K}_4$ ) in  $\text{CDCl}_3$

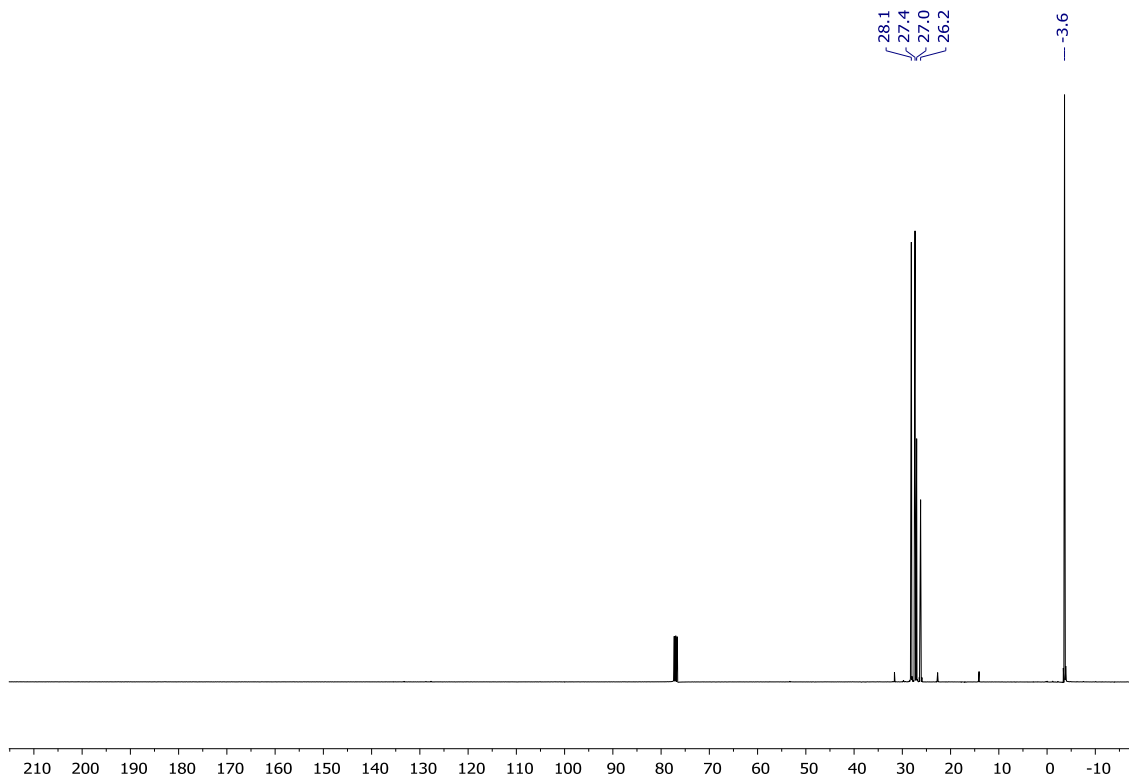

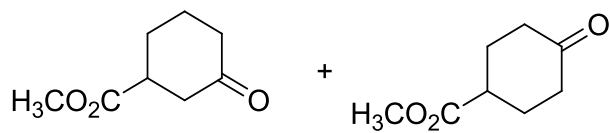

$^1\text{H-NMR}$  of **P4** ( $\text{K}_3+\text{K}_4$ ) in  $\text{CDCl}_3$

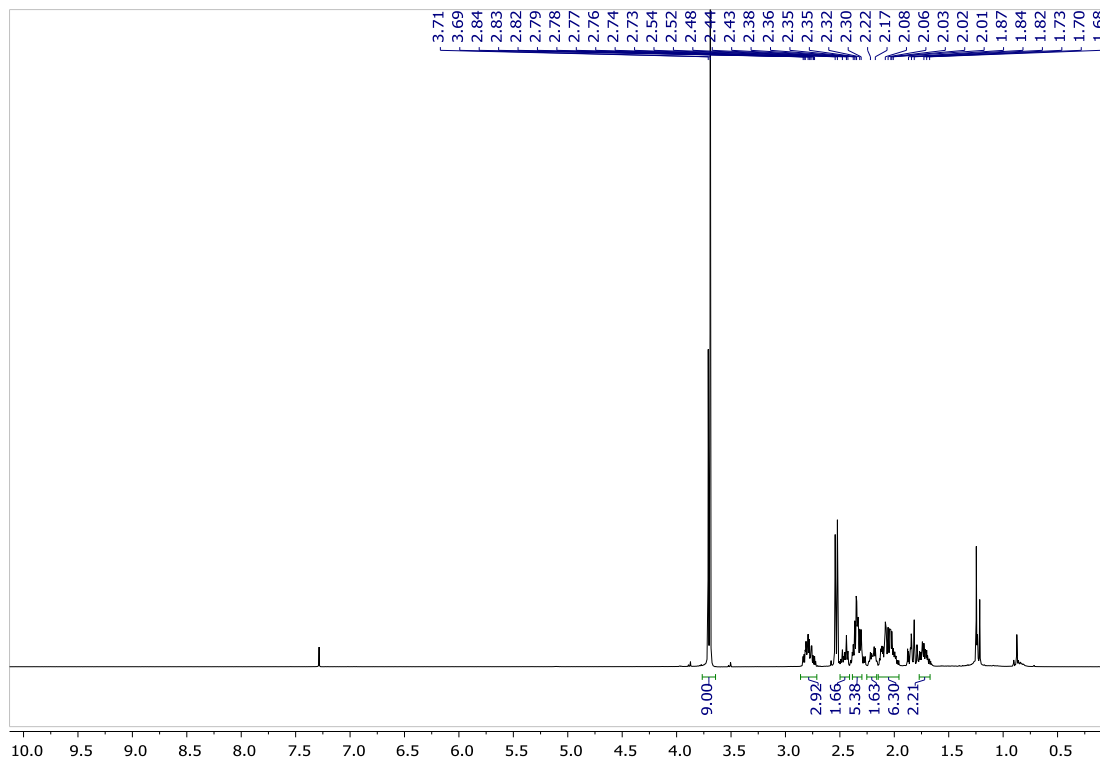

$^{13}\text{C}\{^1\text{H}\}$ -NMR of **P4** ( $\text{K}_3+\text{K}_4$ ) in  $\text{CDCl}_3$

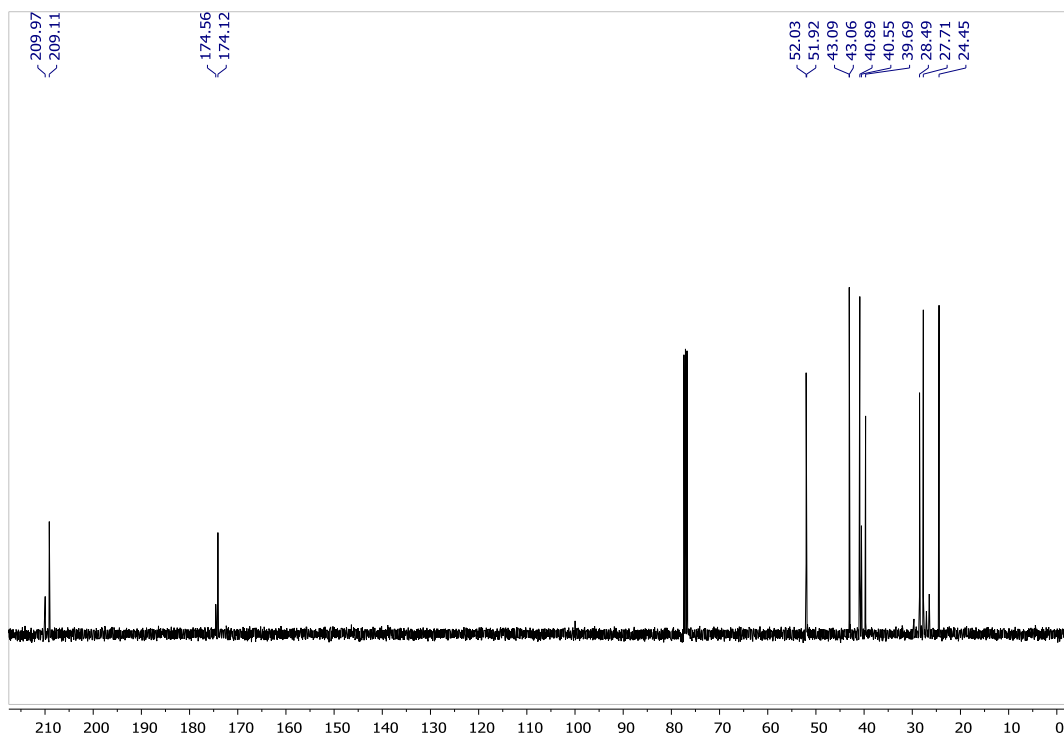

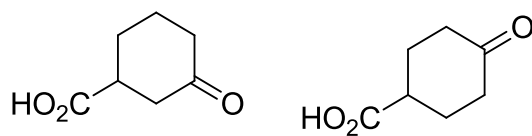

$^1\text{H-NMR}$  of **P5** ( $\text{K}_3+\text{K}_4$ ) in  $\text{CDCl}_3$

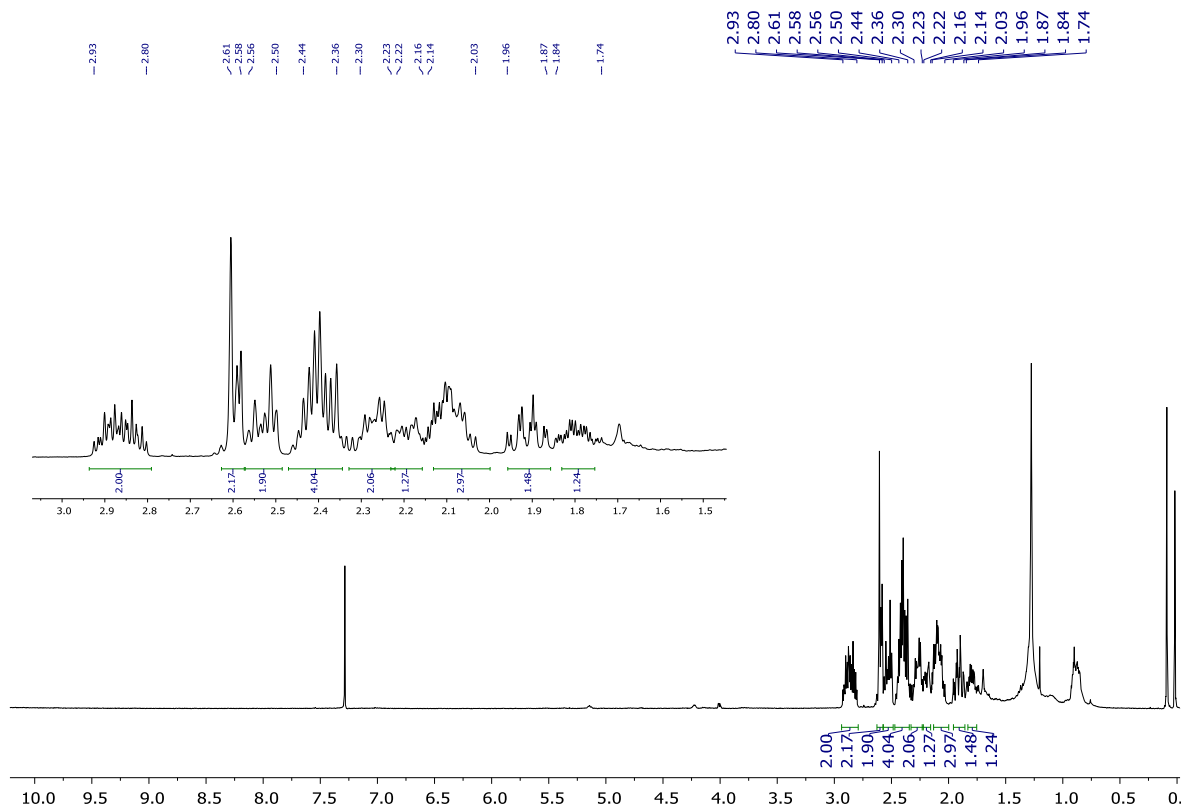

$^{13}\text{C}\{^1\text{H}\}$ -NMR of **P5** ( $\text{K}_3+\text{K}_4$ ) in  $\text{CDCl}_3$

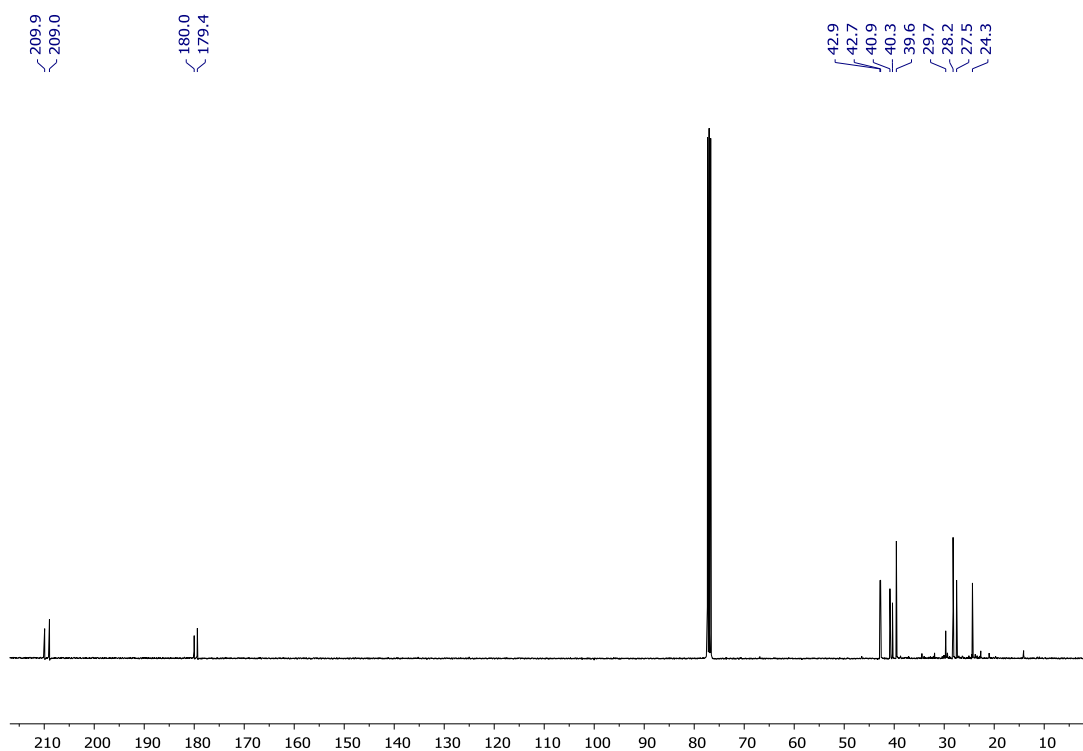

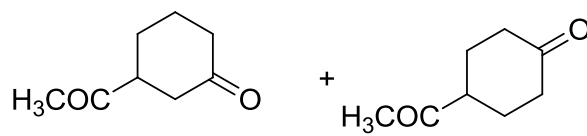

$^1\text{H-NMR}$  of P6 ( $\text{K}_3+\text{K}_4$ ) in  $\text{CDCl}_3$

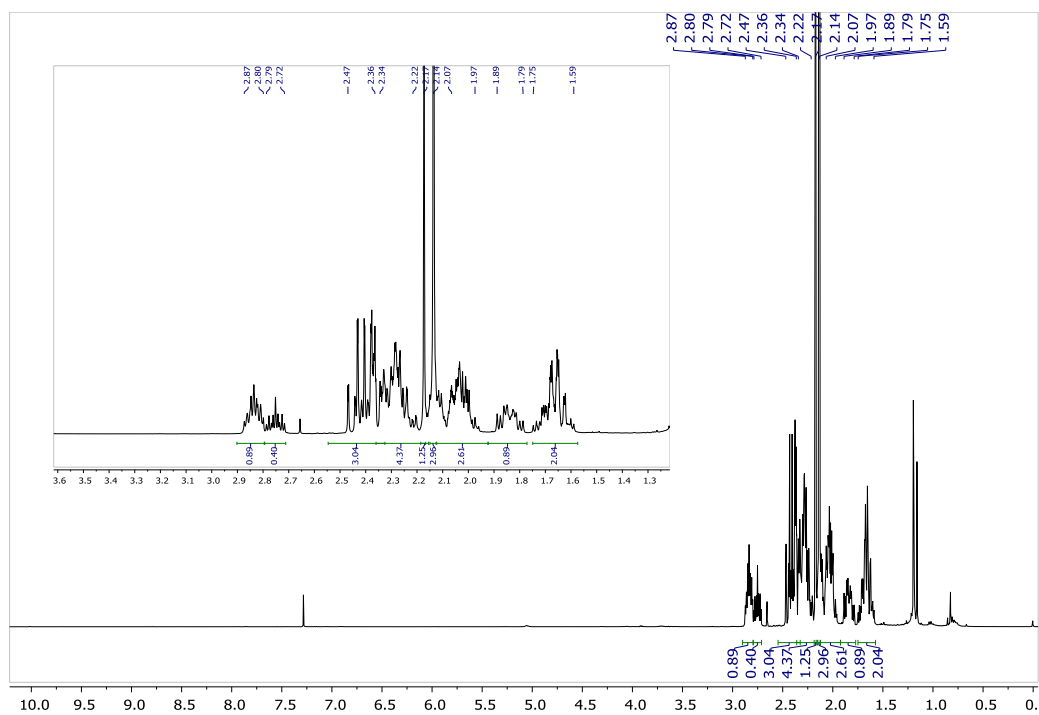

$^{13}\text{C}\{^1\text{H}\}$ -NMR of P6 ( $\text{K}_3+\text{K}_4$ ) in  $\text{CDCl}_3$

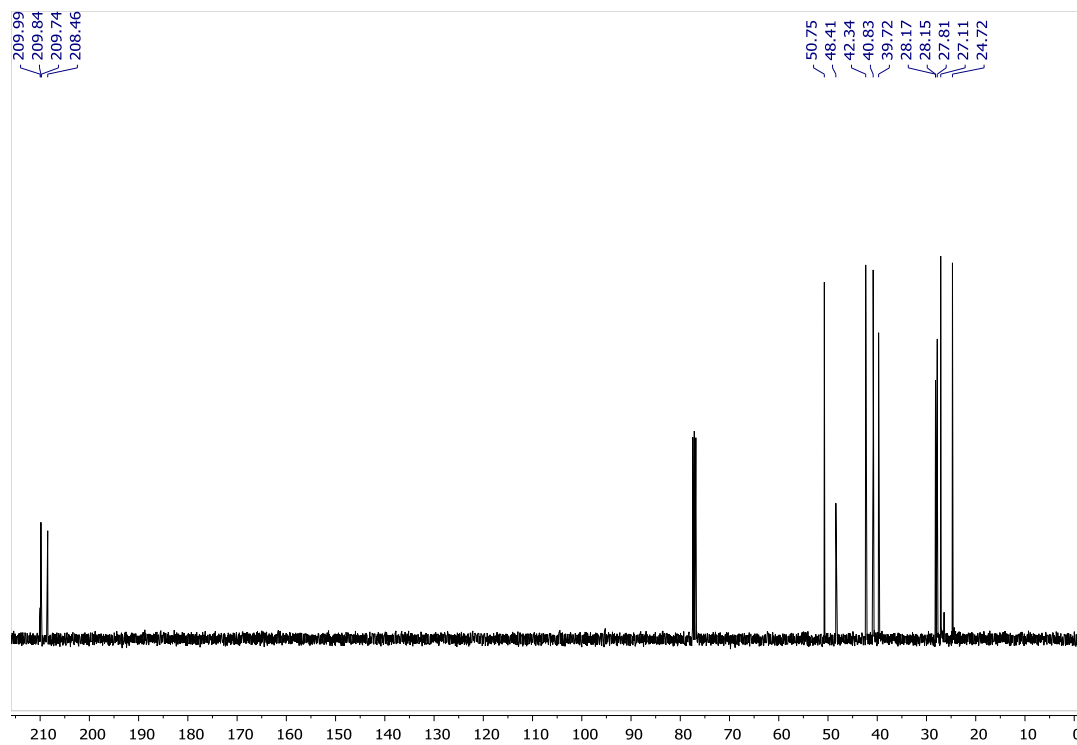



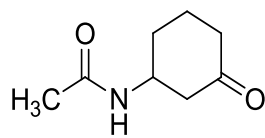

$^1\text{H-NMR}$  of **P7** in  $\text{CDCl}_3$

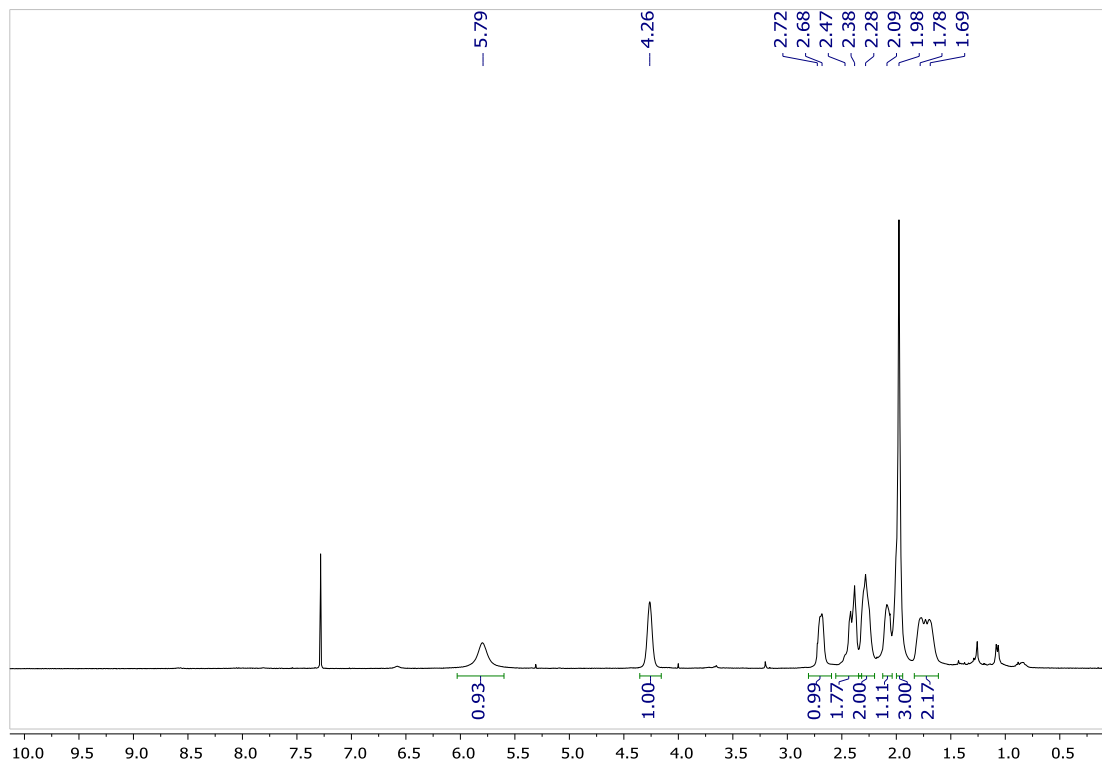

$^{13}\text{C}\{^1\text{H}\}$ -NMR of **P7** in  $\text{CDCl}_3$

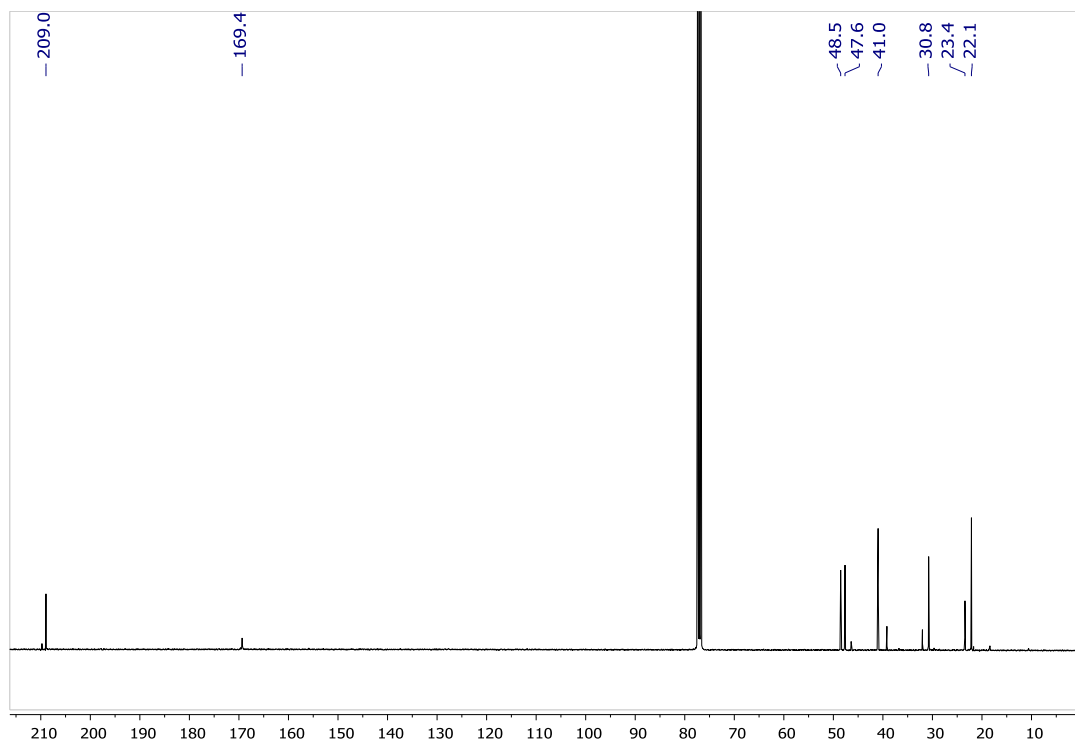

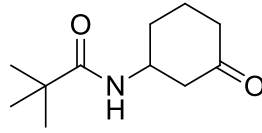

$^1\text{H-NMR}$  of **P8** in  $\text{CDCl}_3$

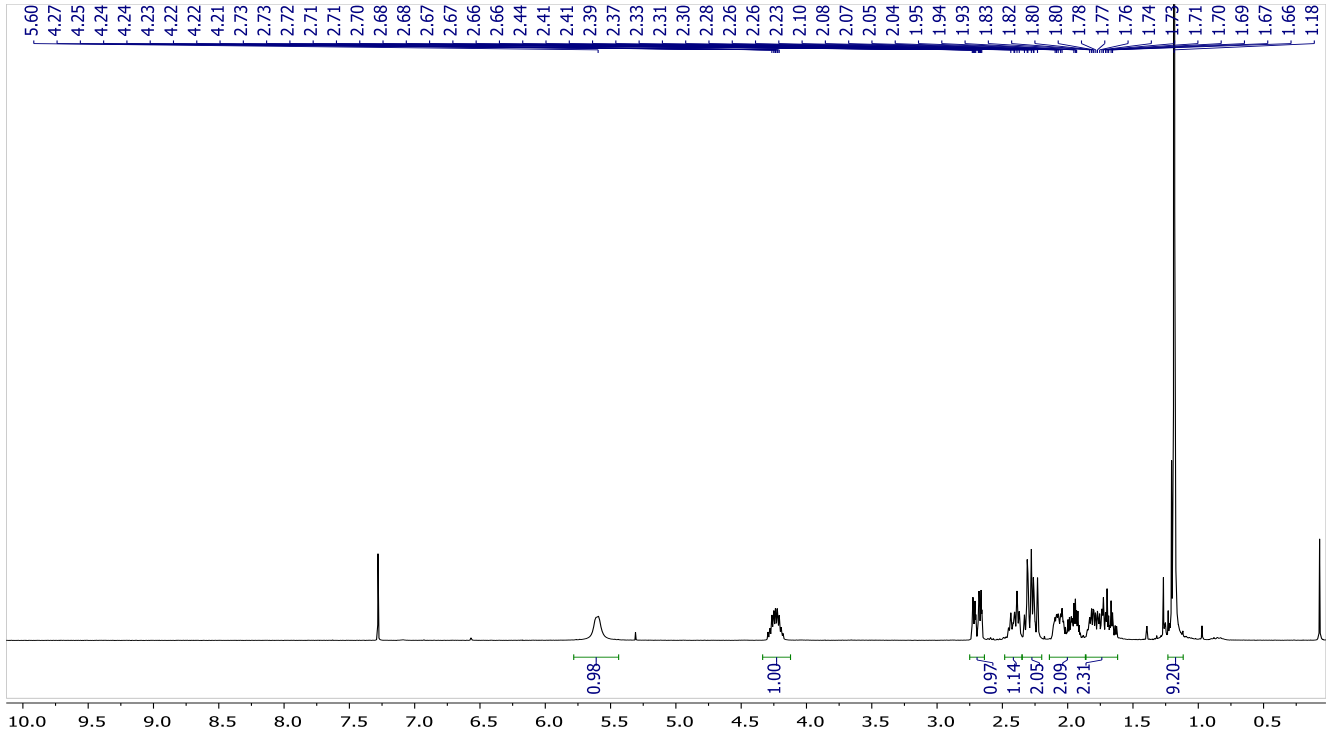

$^{13}\text{C}\{^1\text{H}\}$ -NMR of **P8** in  $\text{CDCl}_3$

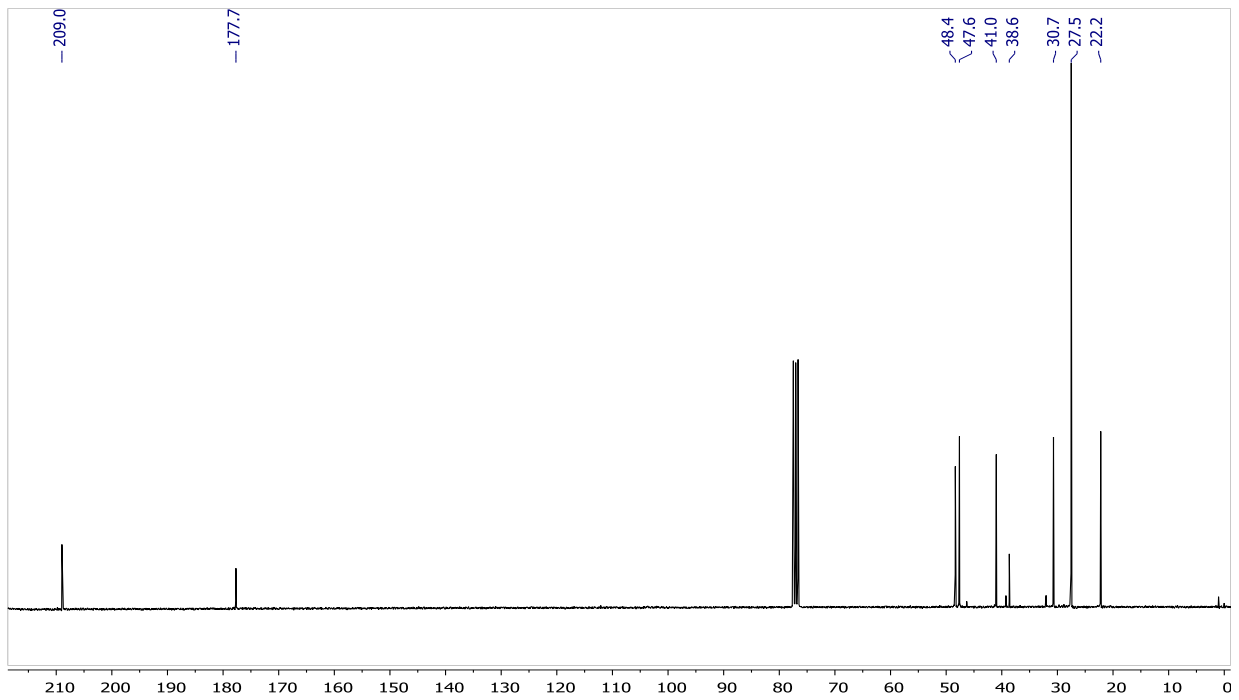

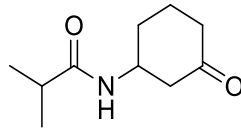

$^1\text{H-NMR}$  of **P9** in  $\text{CDCl}_3$

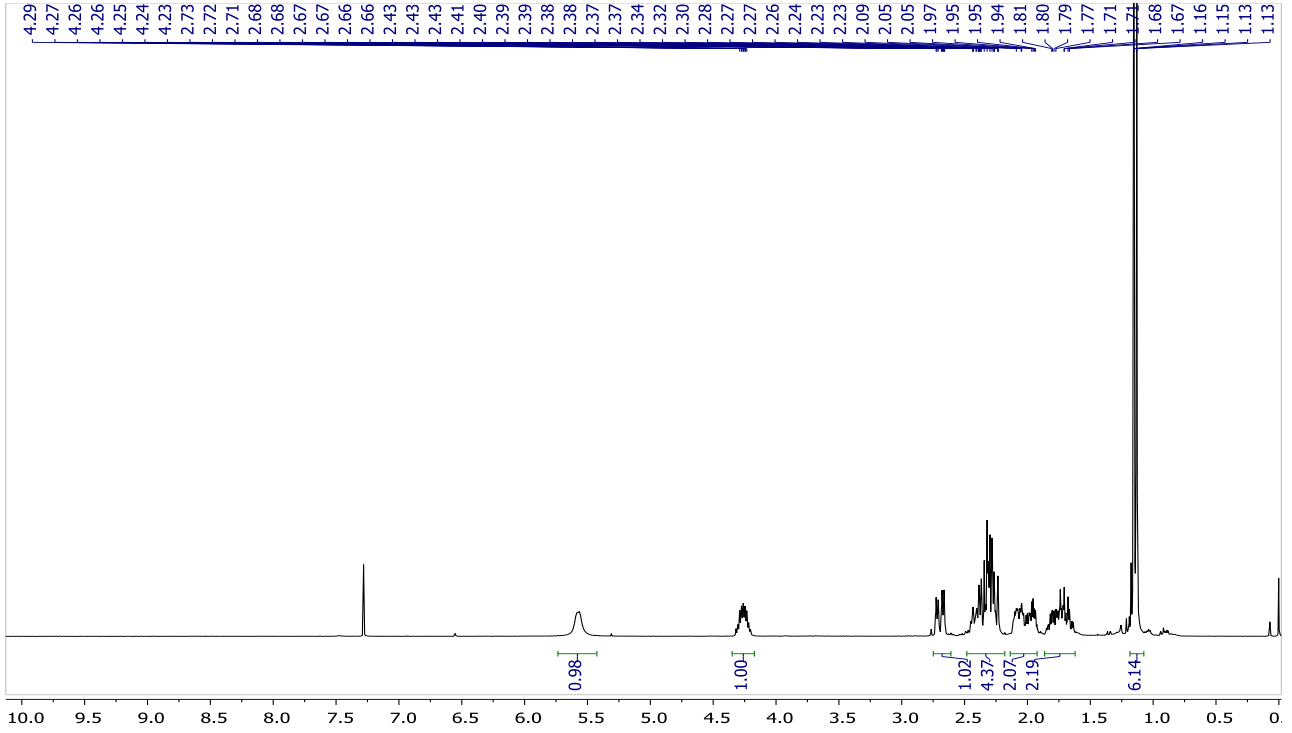

$^{13}\text{C}\{^1\text{H}\}$ -NMR of **P9** in  $\text{CDCl}_3$

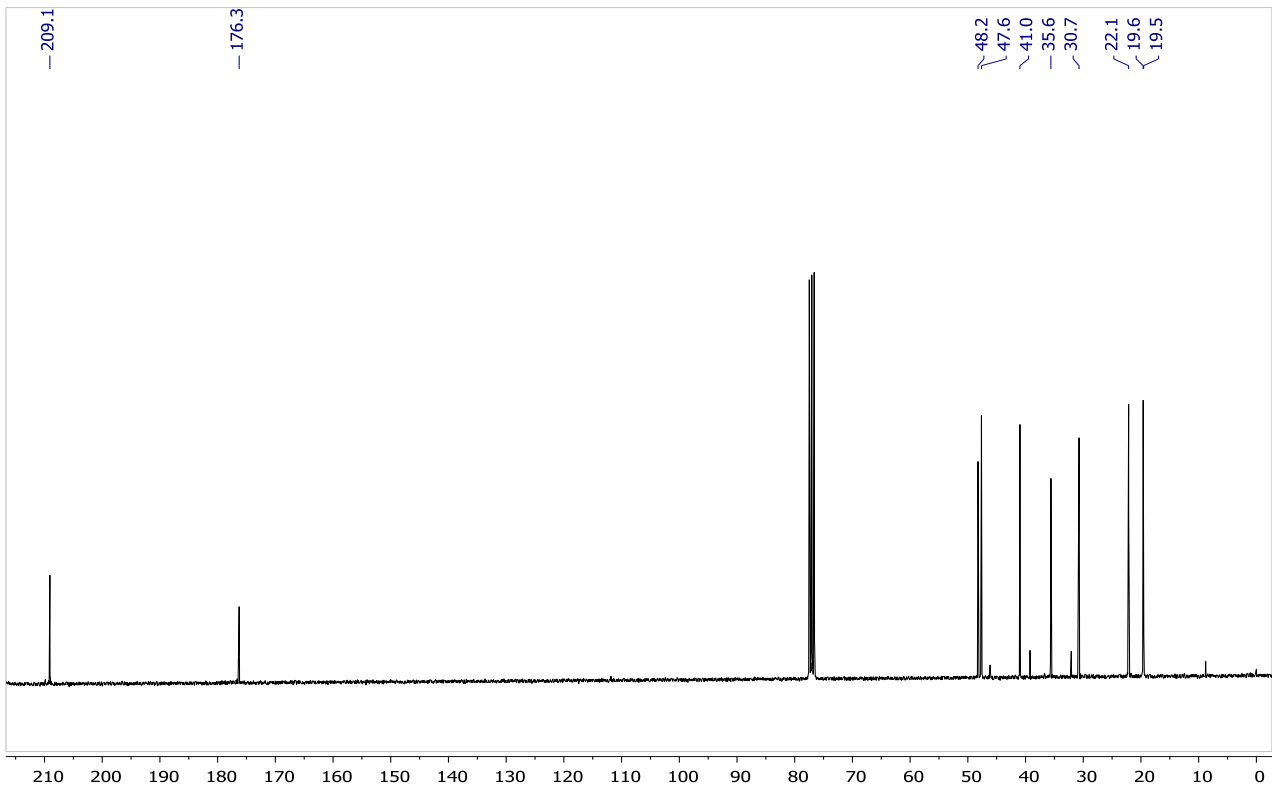

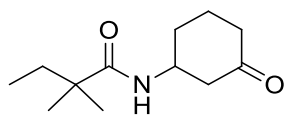

$^1\text{H-NMR}$  of **P10** in  $\text{CDCl}_3$

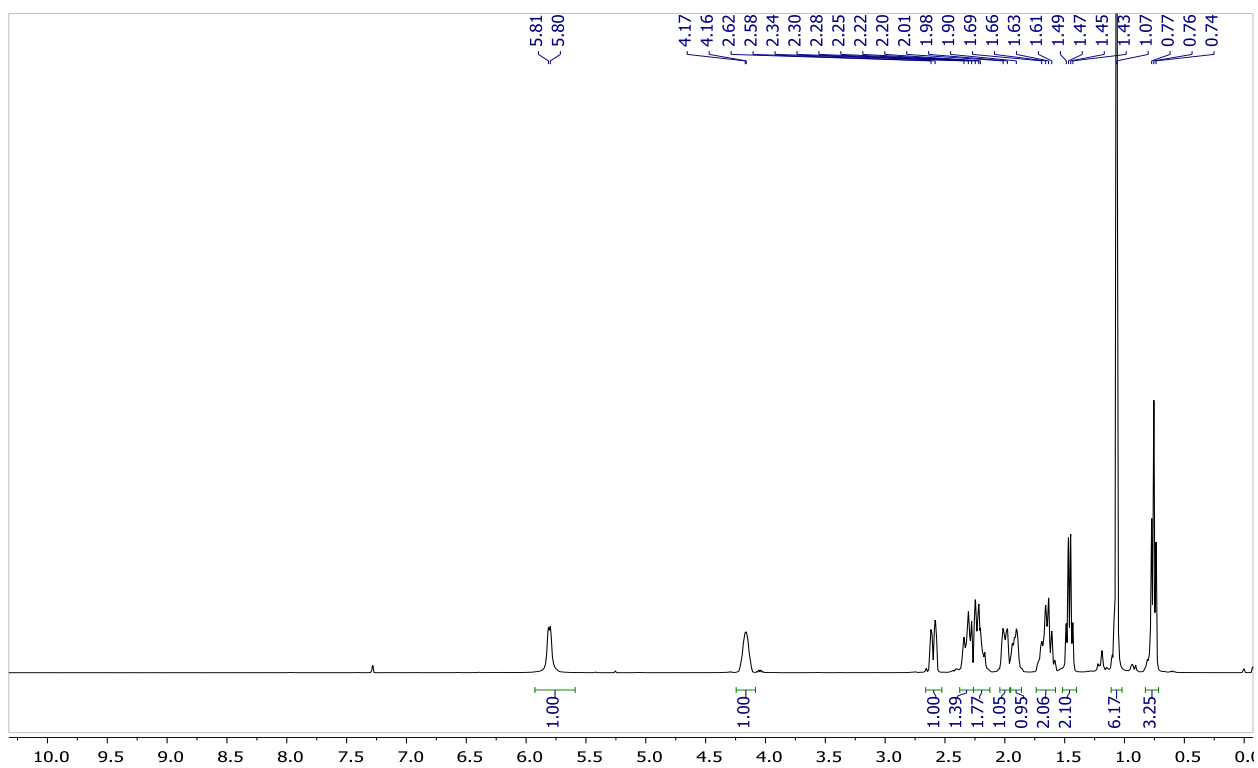

$^{13}\text{C}\{^1\text{H}\}$ -NMR of **P10** in  $\text{CDCl}_3$

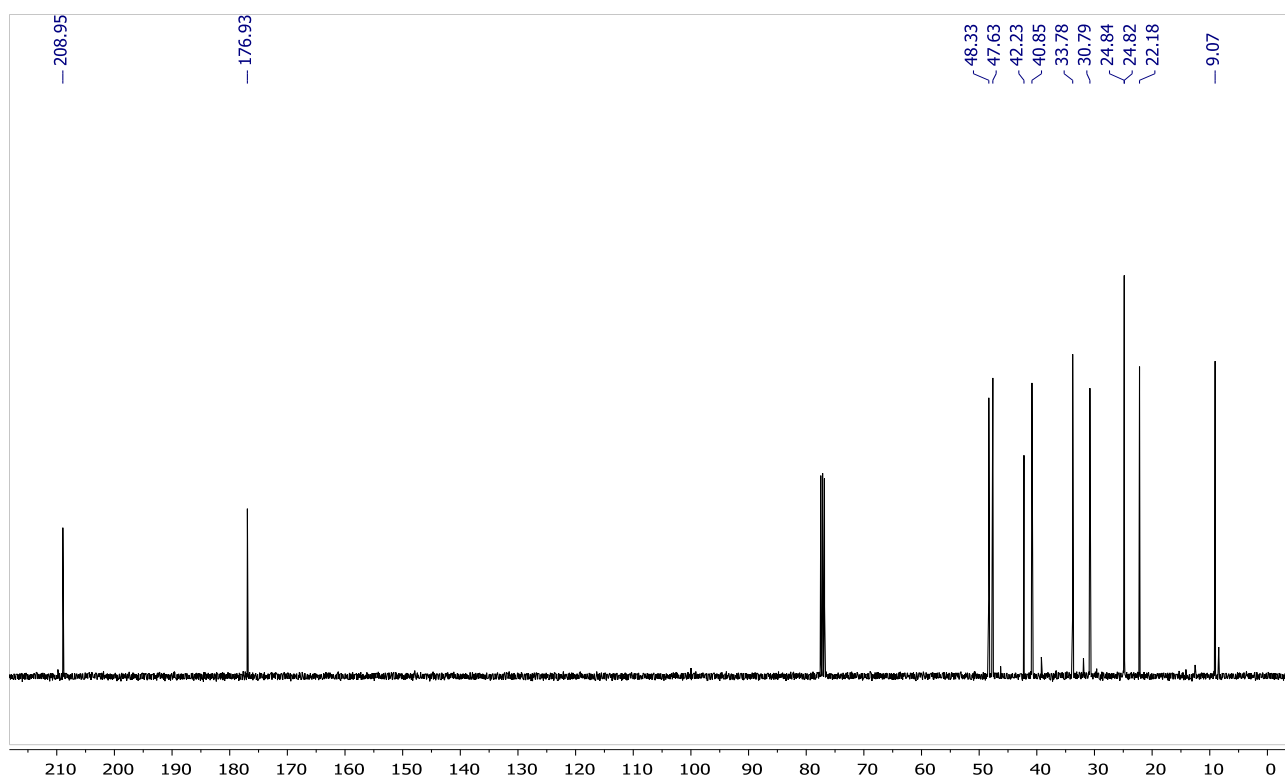

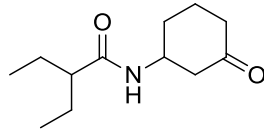

$^1\text{H-NMR}$  of **P11** in  $\text{CDCl}_3$

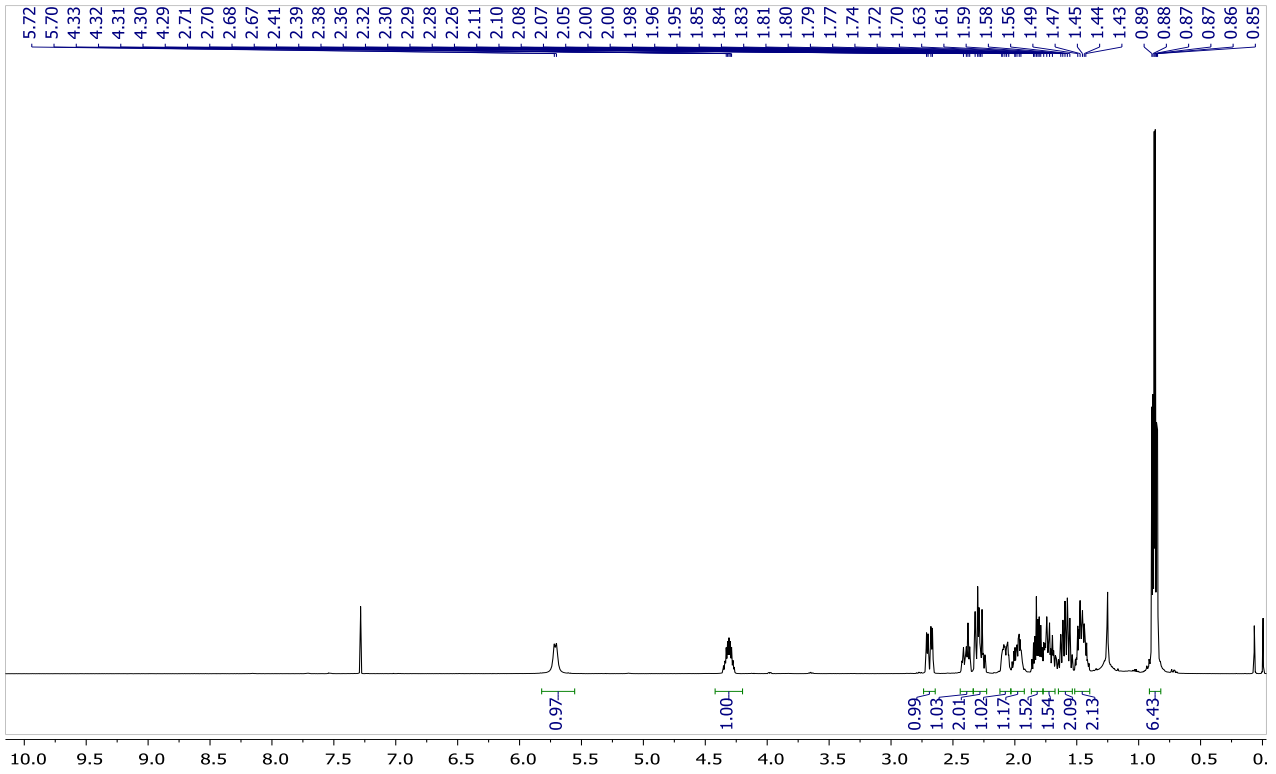

$^{13}\text{C}\{^1\text{H}\}$ -NMR of **P11** in  $\text{CDCl}_3$

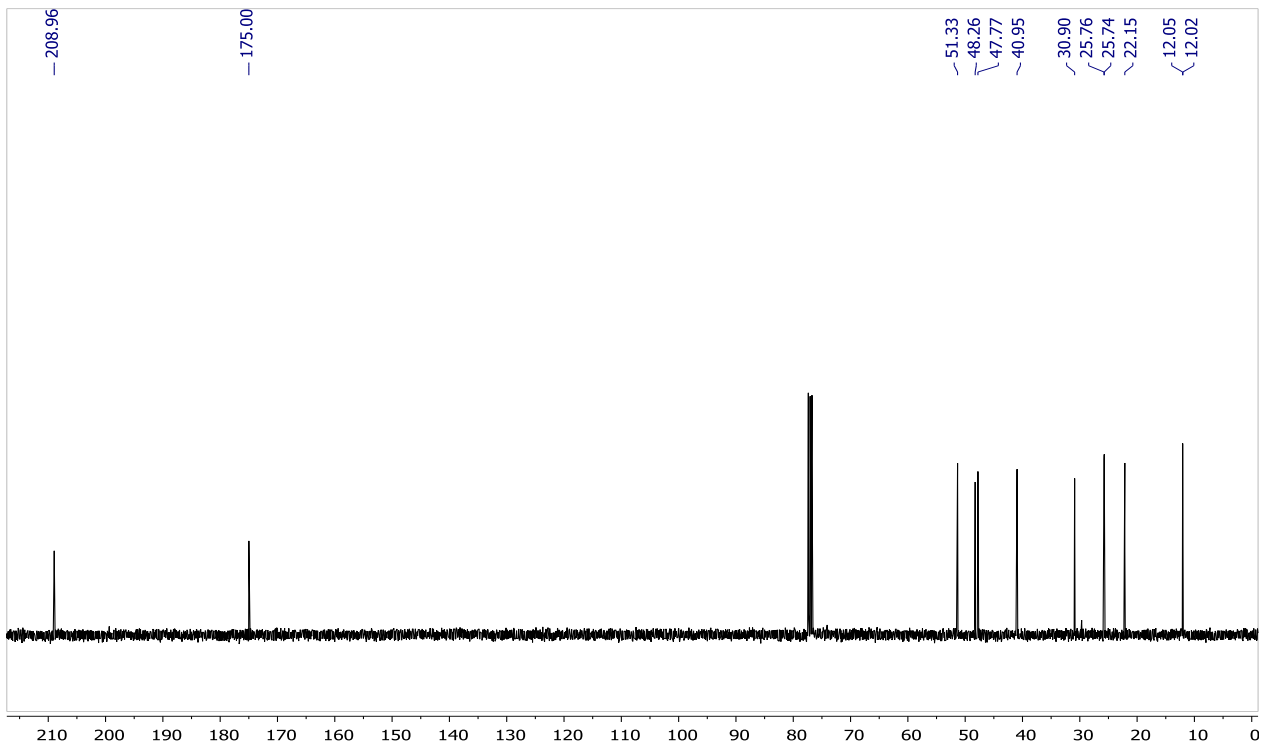

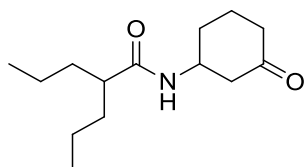

$^1\text{H-NMR}$  of **P12** in  $\text{CDCl}_3$

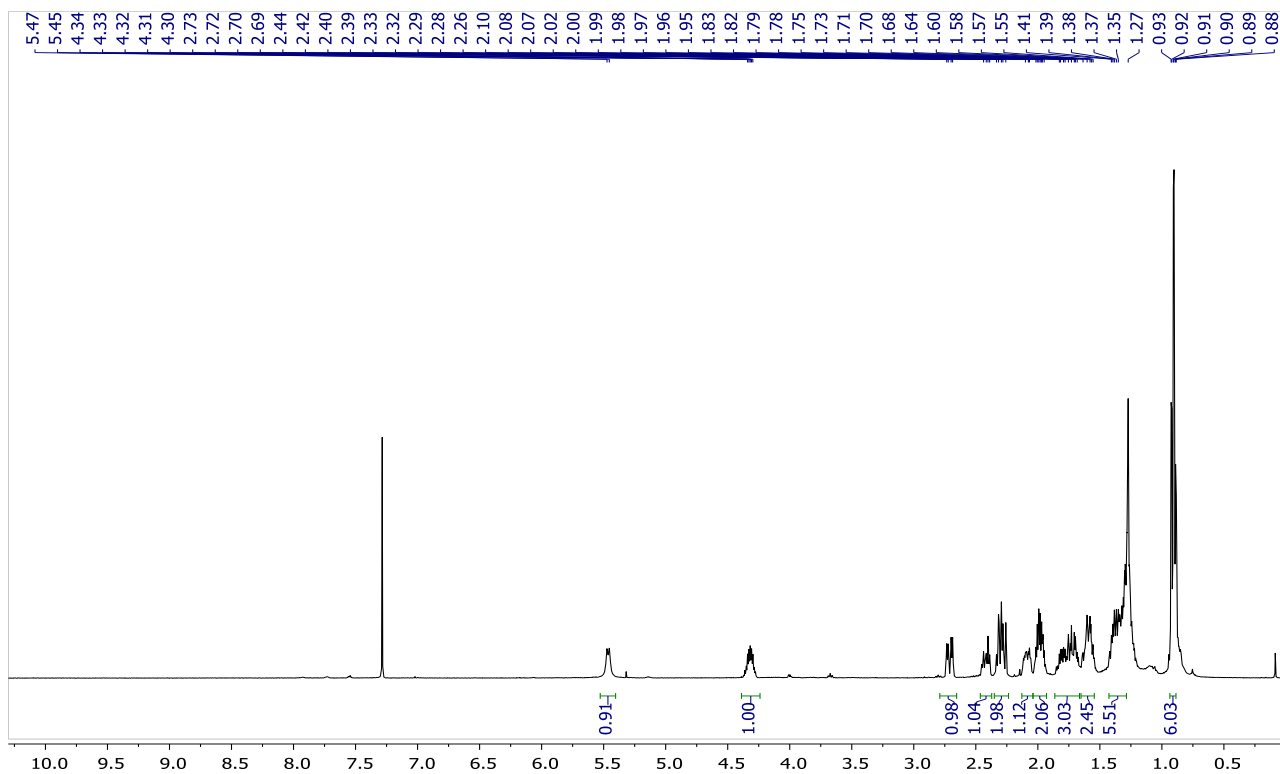

$^{13}\text{C}\{^1\text{H}\}$ -NMR of **P12** in  $\text{CDCl}_3$

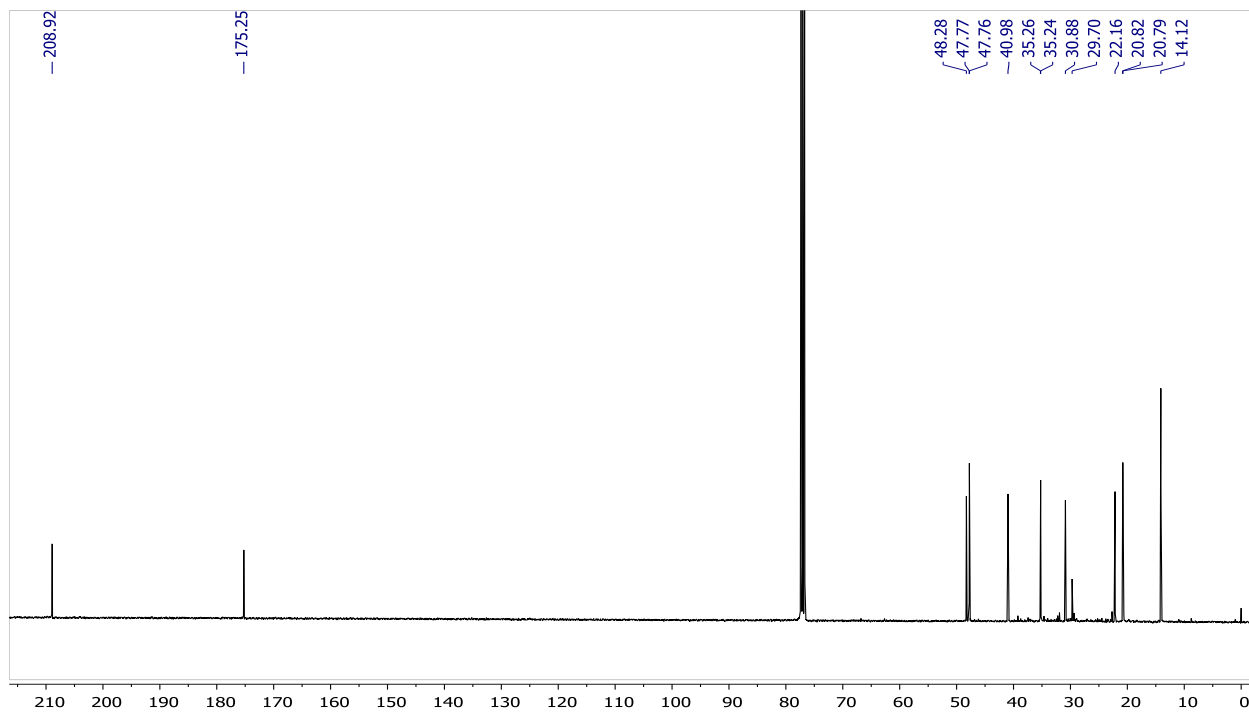

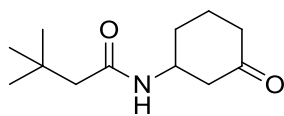

$^1\text{H-NMR}$  of **P13** in  $\text{CDCl}_3$

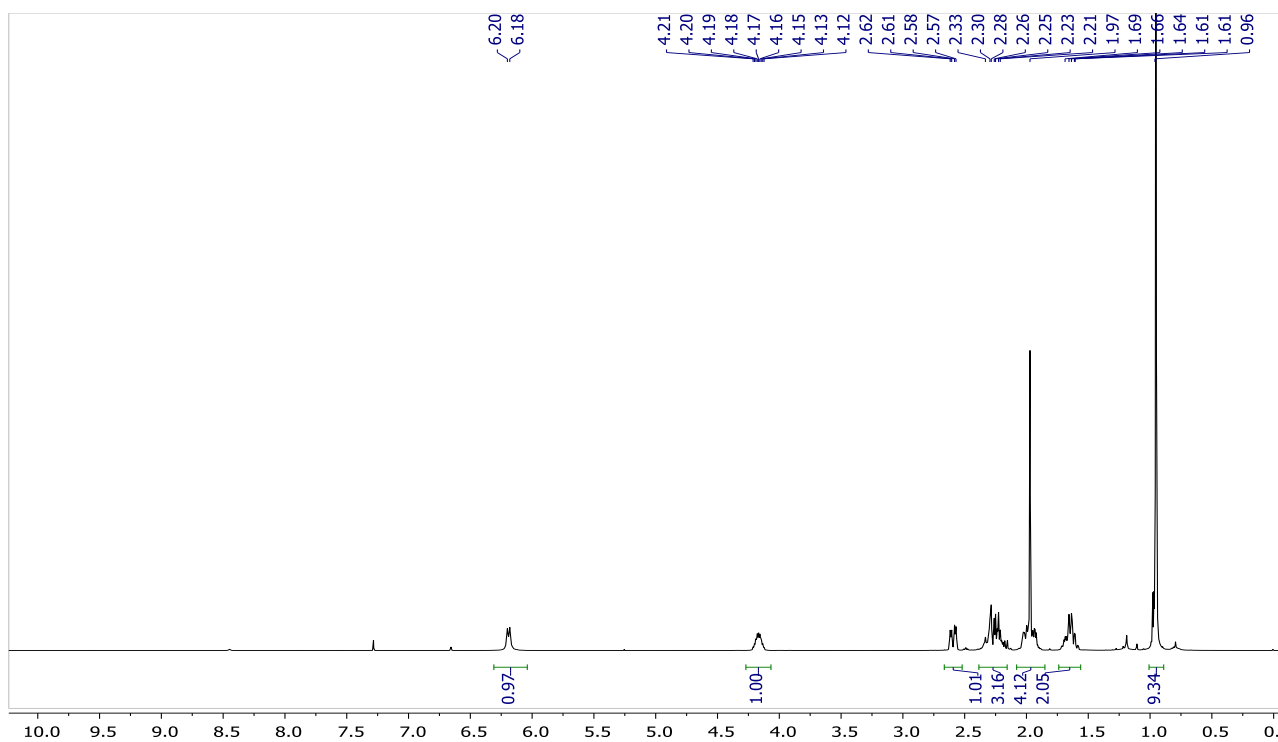

$^{13}\text{C}\{^1\text{H}\}$ -NMR of **P13** in  $\text{CDCl}_3$

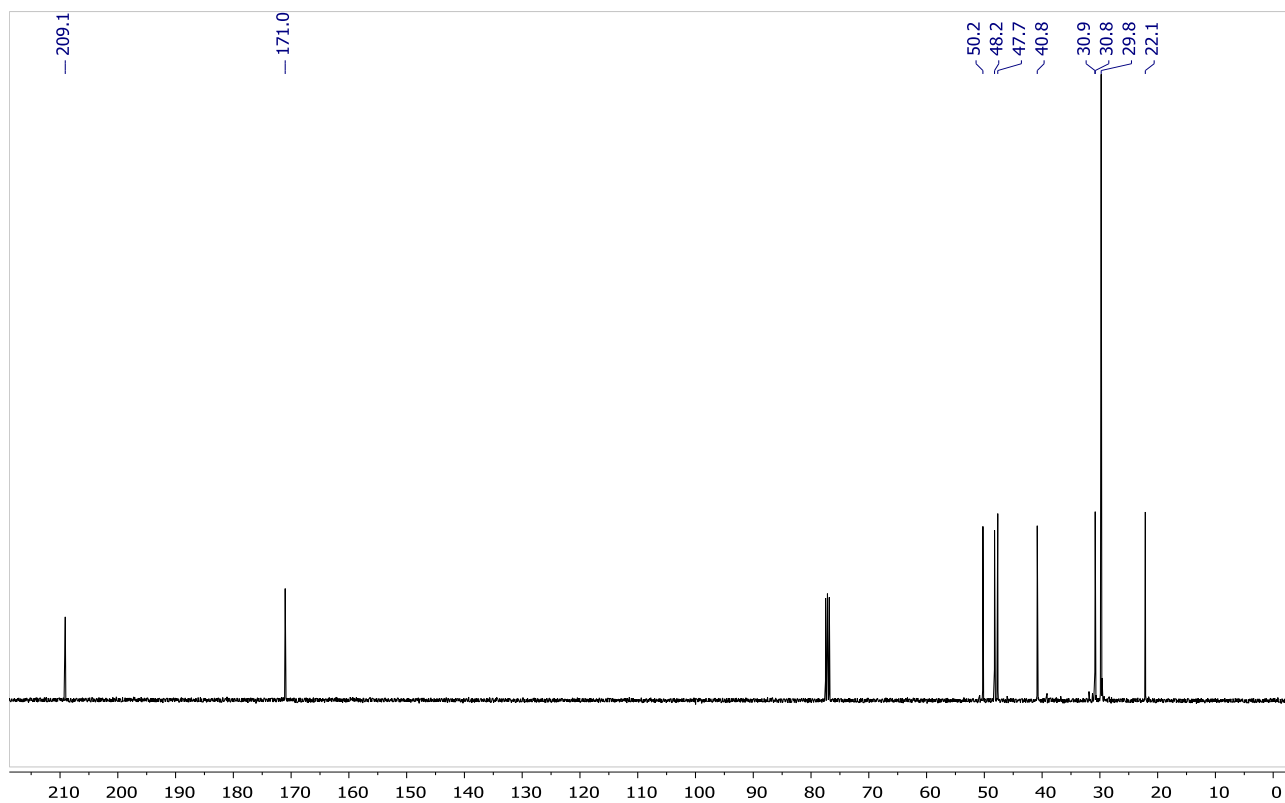

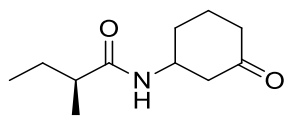

$^1\text{H-NMR}$  of **P14** in  $\text{CDCl}_3$

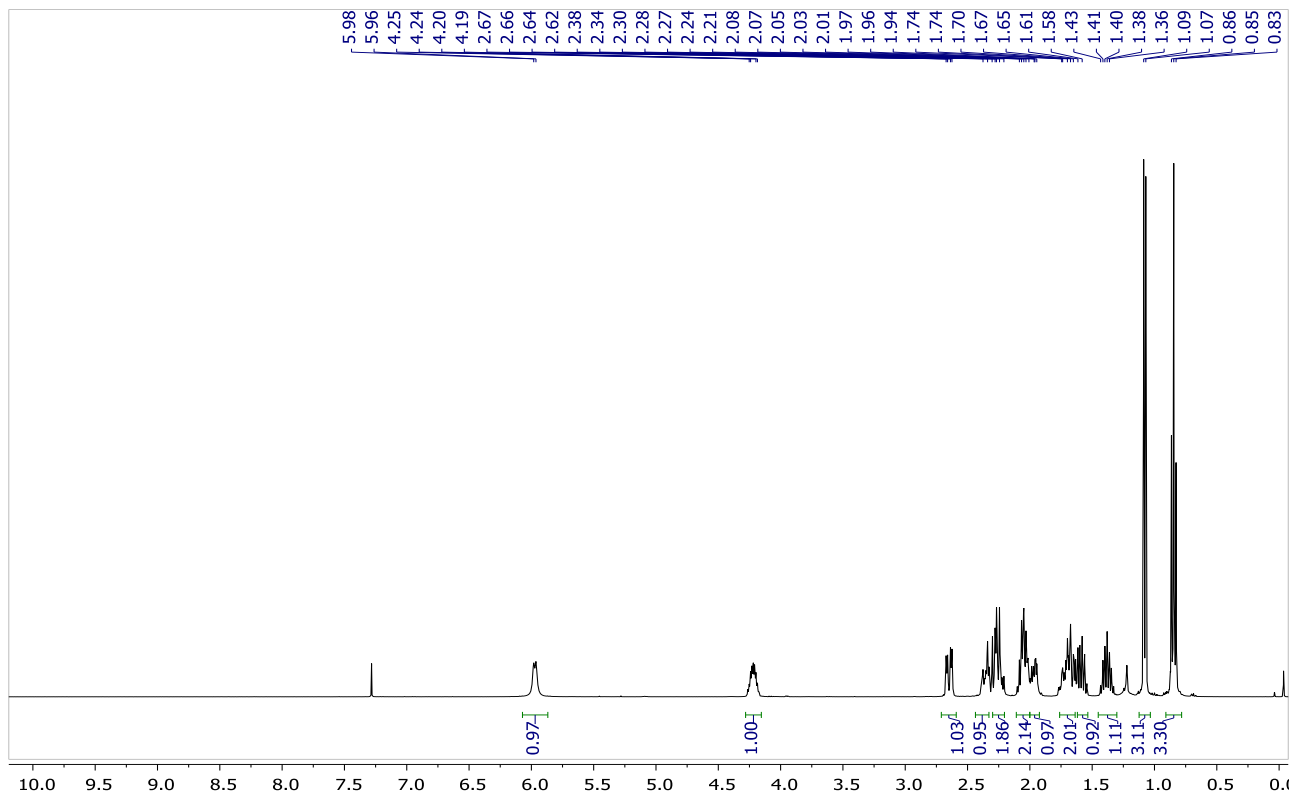

$^{13}\text{C}\{^1\text{H}\}$ -NMR of **P14** in  $\text{CDCl}_3$

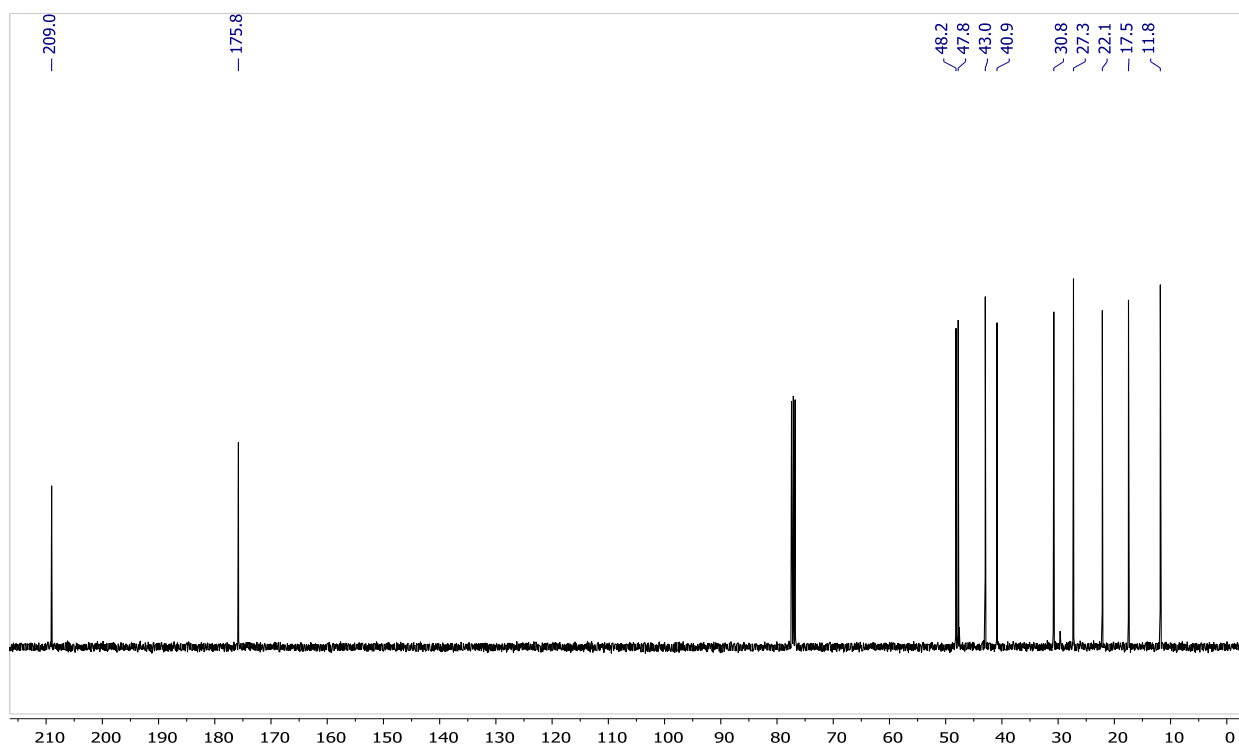



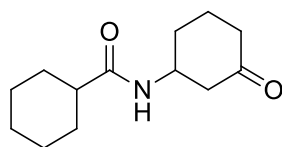

$^1\text{H-NMR}$  of **P15** in  $\text{CDCl}_3$

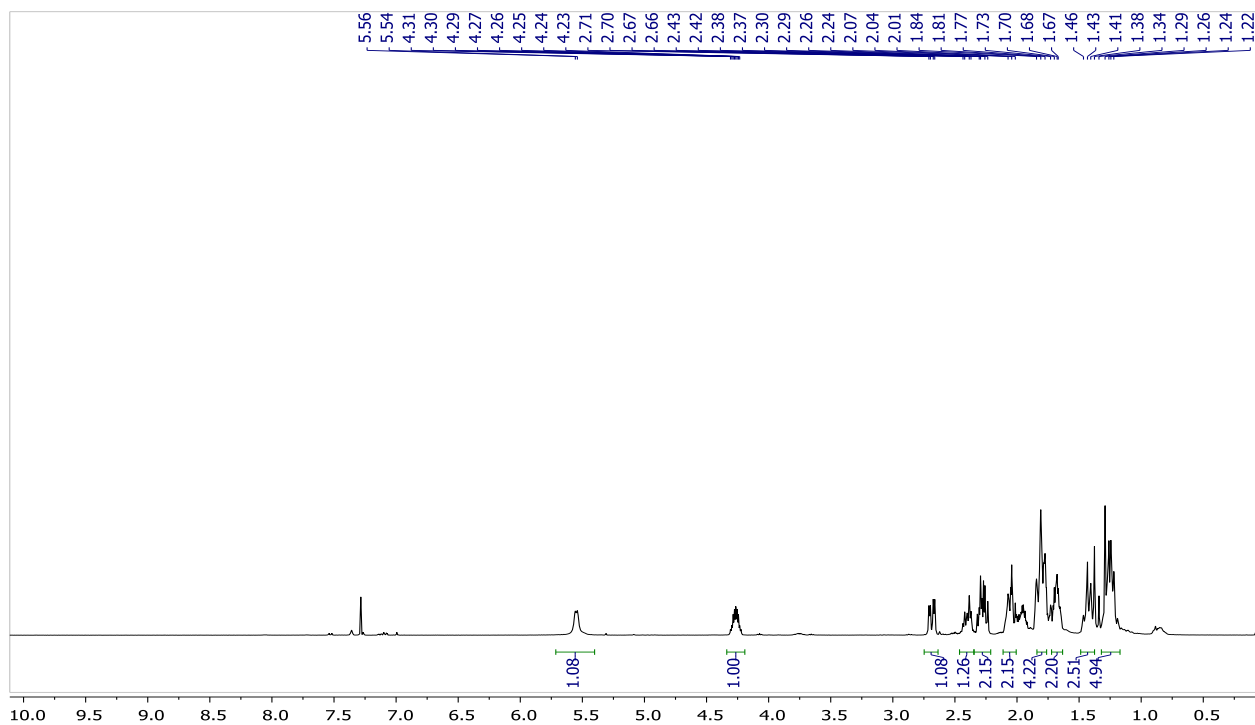

$^{13}\text{C}\{^1\text{H}\}$ -NMR of **P15** in  $\text{CDCl}_3$

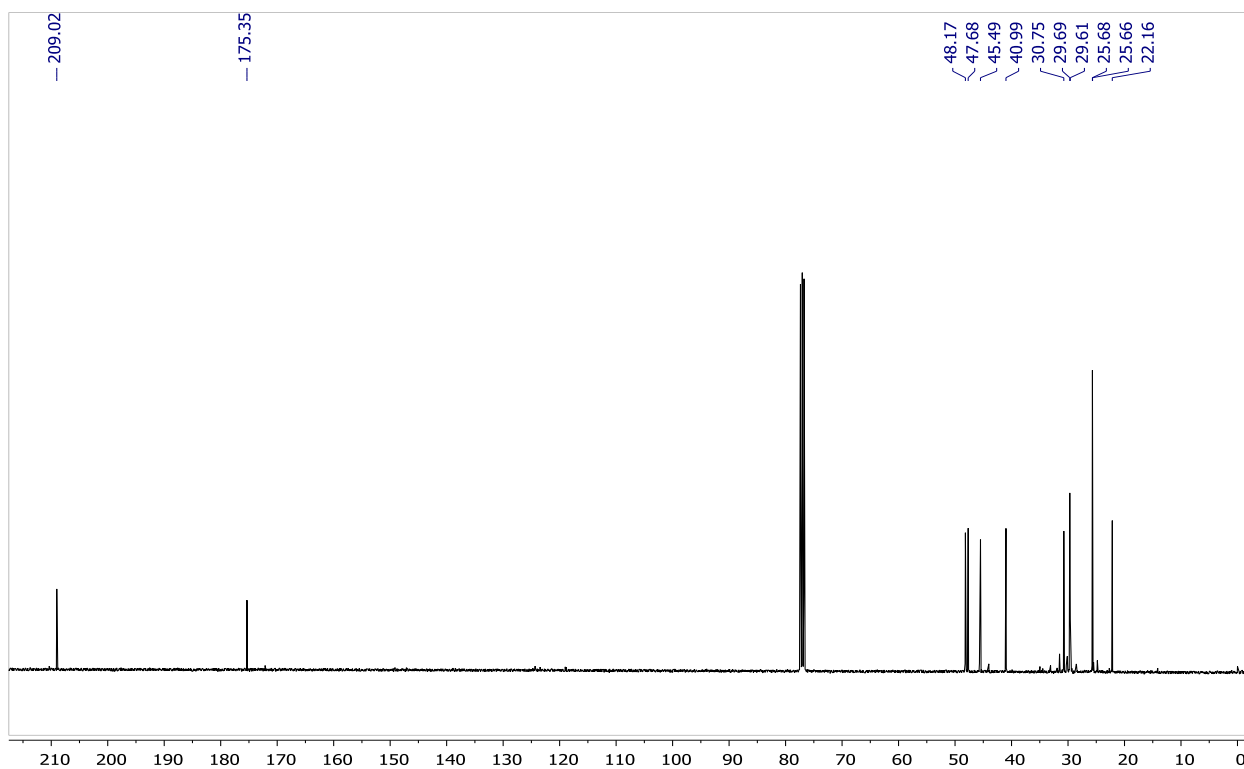

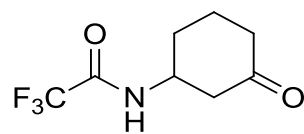

$^1\text{H-NMR}$  of **P17** in  $\text{CDCl}_3$

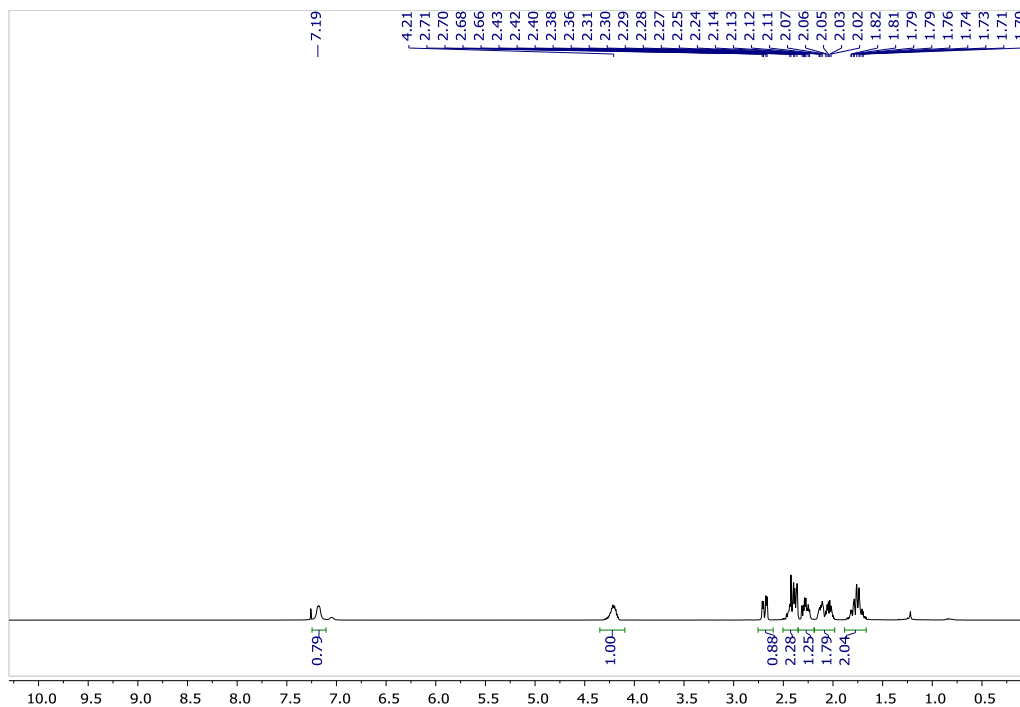

$^{13}\text{C}\{^1\text{H}\}$ -NMR of **P17** in  $\text{CDCl}_3$

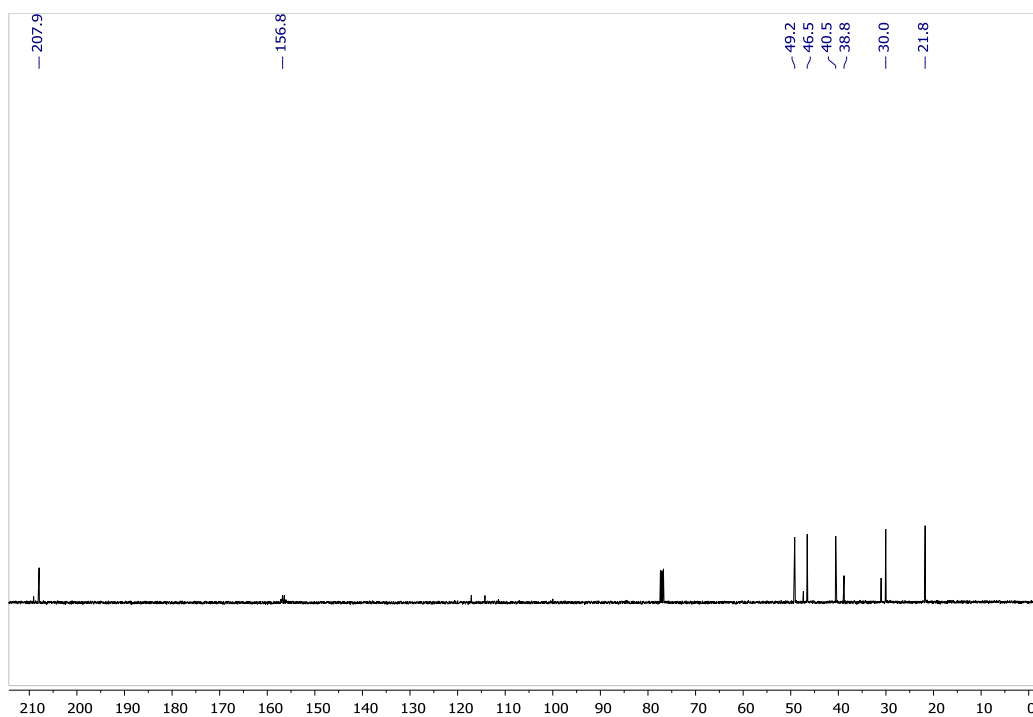

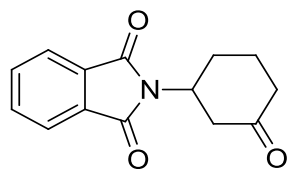

**P18 (K<sub>3</sub>)**

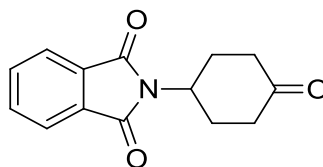

**P18 (K<sub>4</sub>)**

<sup>1</sup>H-NMR of **P18 (K<sub>3</sub>+K<sub>4</sub>)** in CDCl<sub>3</sub>

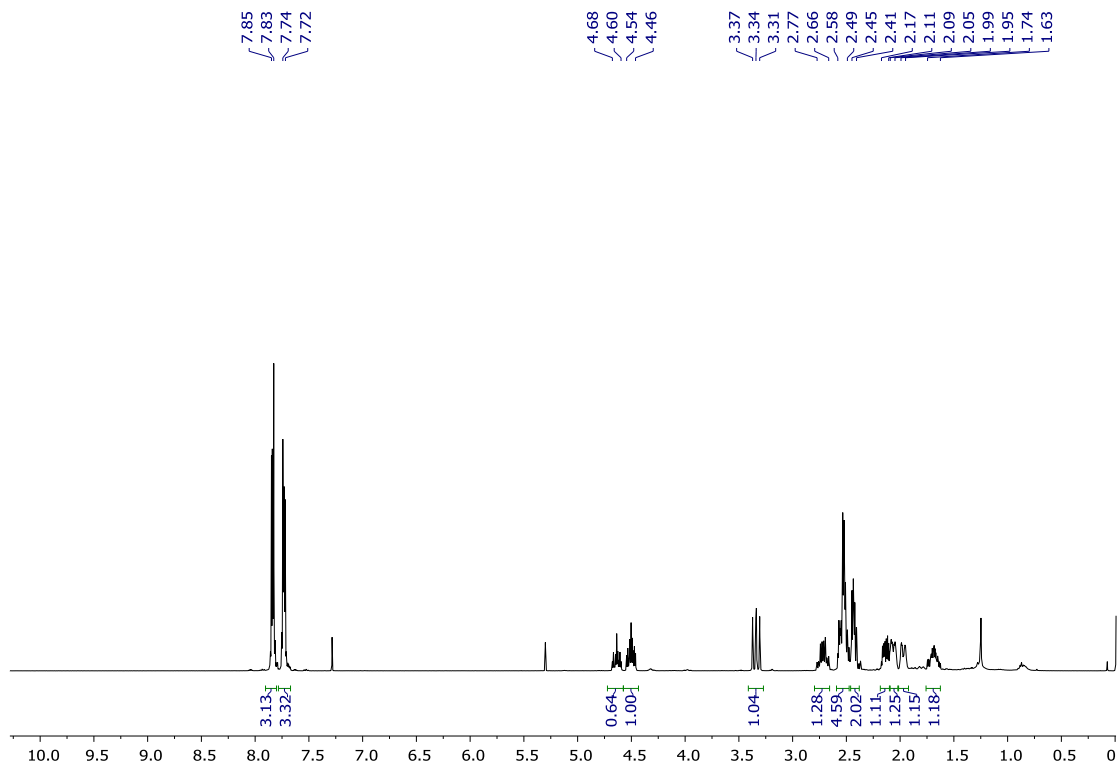

<sup>13</sup>C{<sup>1</sup>H}-NMR of **P18 (K<sub>3</sub>+K<sub>4</sub>)** in CDCl<sub>3</sub>

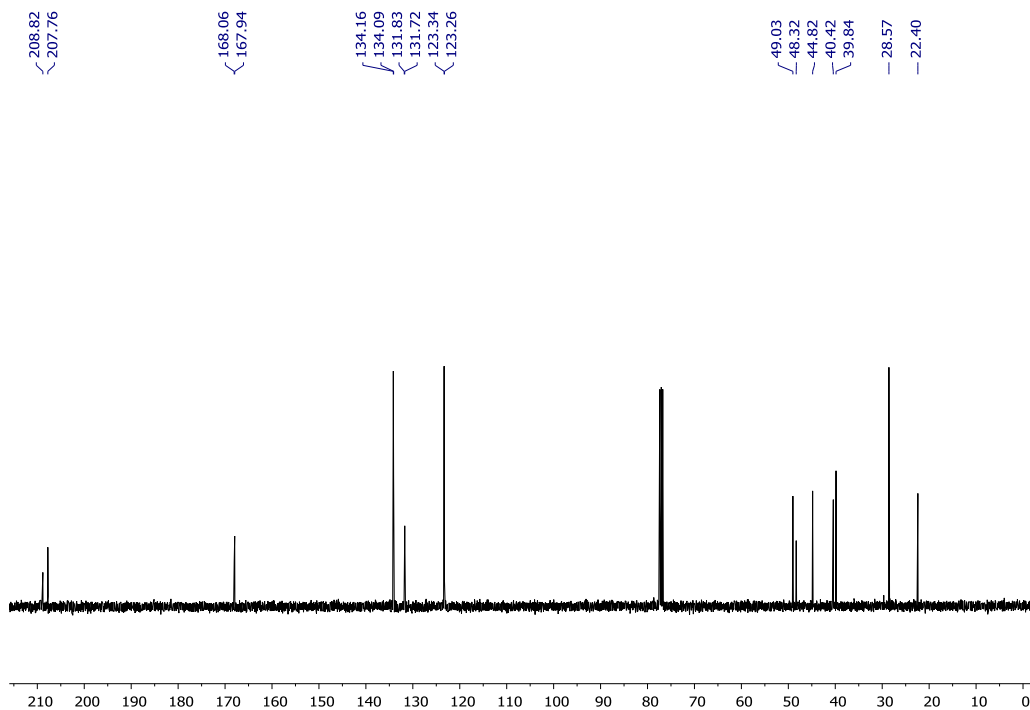

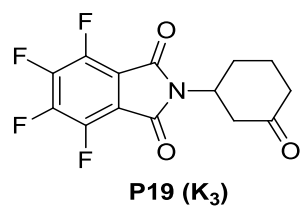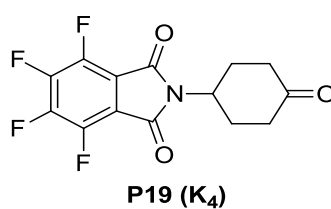

<sup>1</sup>H-NMR of P19 (K<sub>3</sub>+K<sub>4</sub>) in CDCl<sub>3</sub>

4.62  
4.53  
4.44  
3.28  
2.68  
2.57  
2.37  
2.20  
2.13  
2.10  
2.04  
2.00  
1.96  
1.76  
1.65

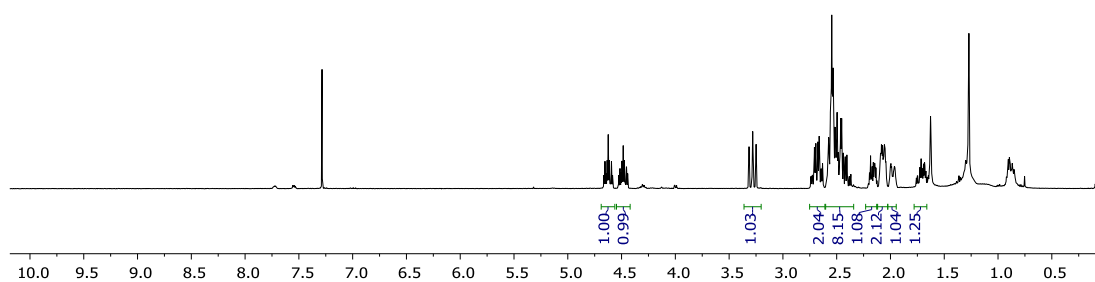

<sup>13</sup>C{<sup>1</sup>H}-NMR of P19 (K<sub>3</sub>+K<sub>4</sub>) in CDCl<sub>3</sub>

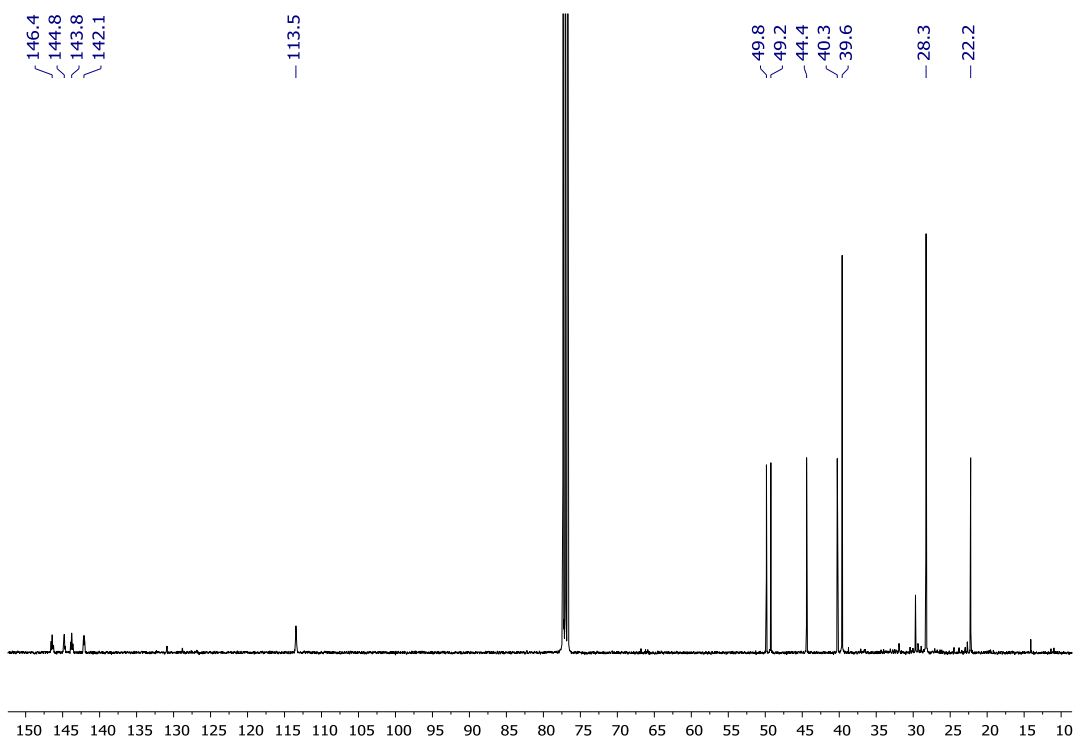

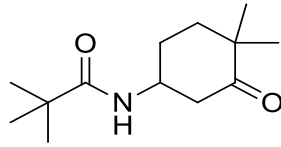

$^1\text{H-NMR}$  of **P20** in  $\text{CDCl}_3$

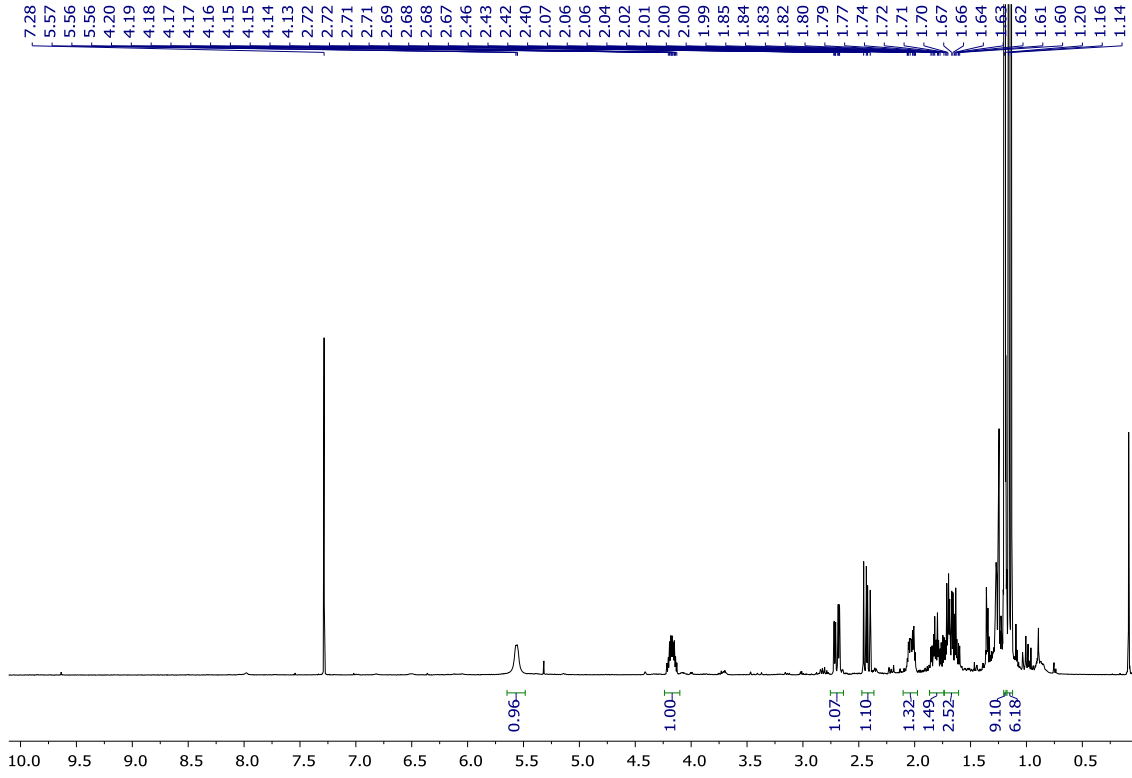

$^{13}\text{C}\{^1\text{H}\}$ -NMR of **P20** in  $\text{CDCl}_3$

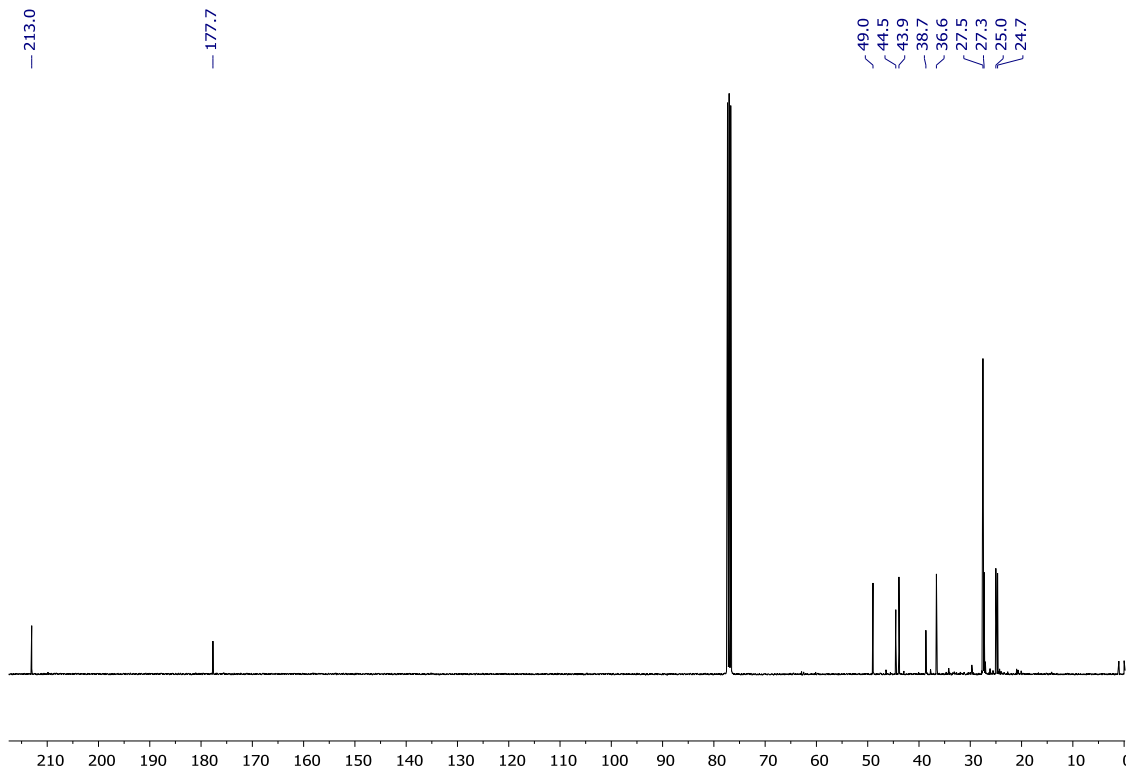

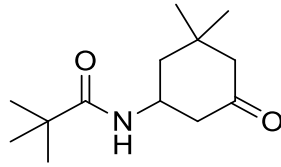

$^1\text{H-NMR}$  of **P21** in  $\text{CDCl}_3$

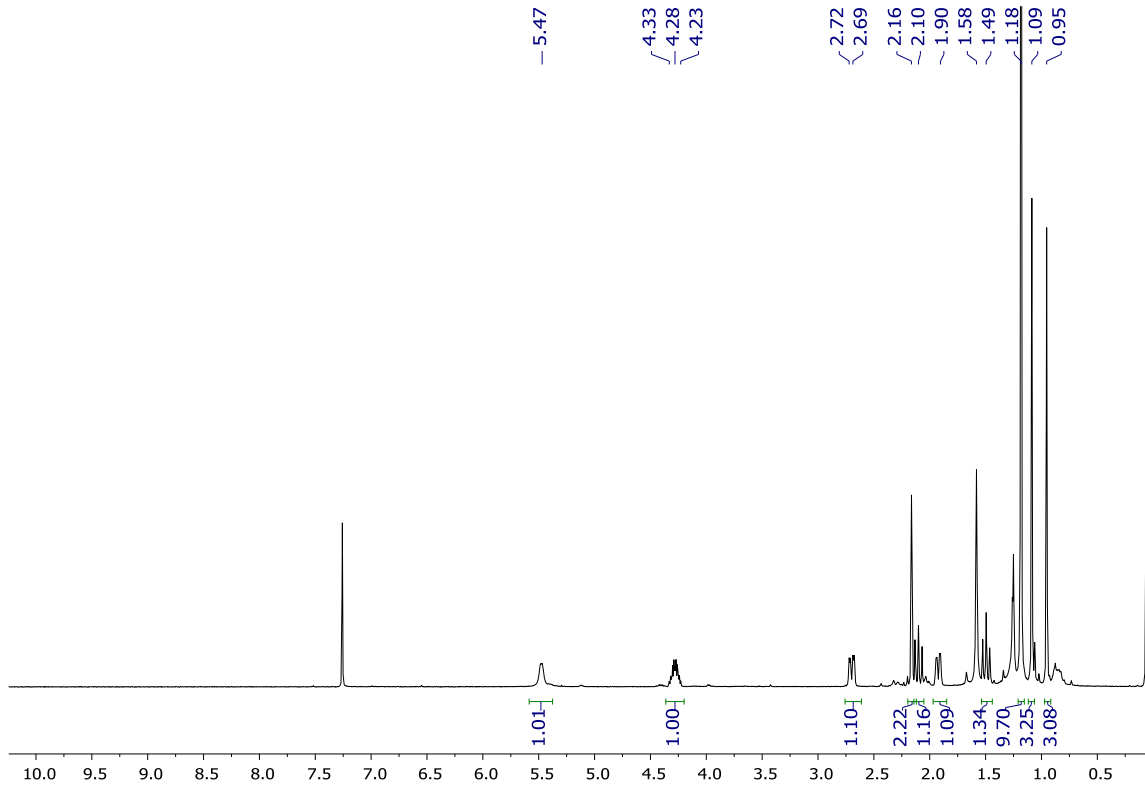

$^{13}\text{C}\{^1\text{H}\}$ -NMR of **P21** in  $\text{CDCl}_3$

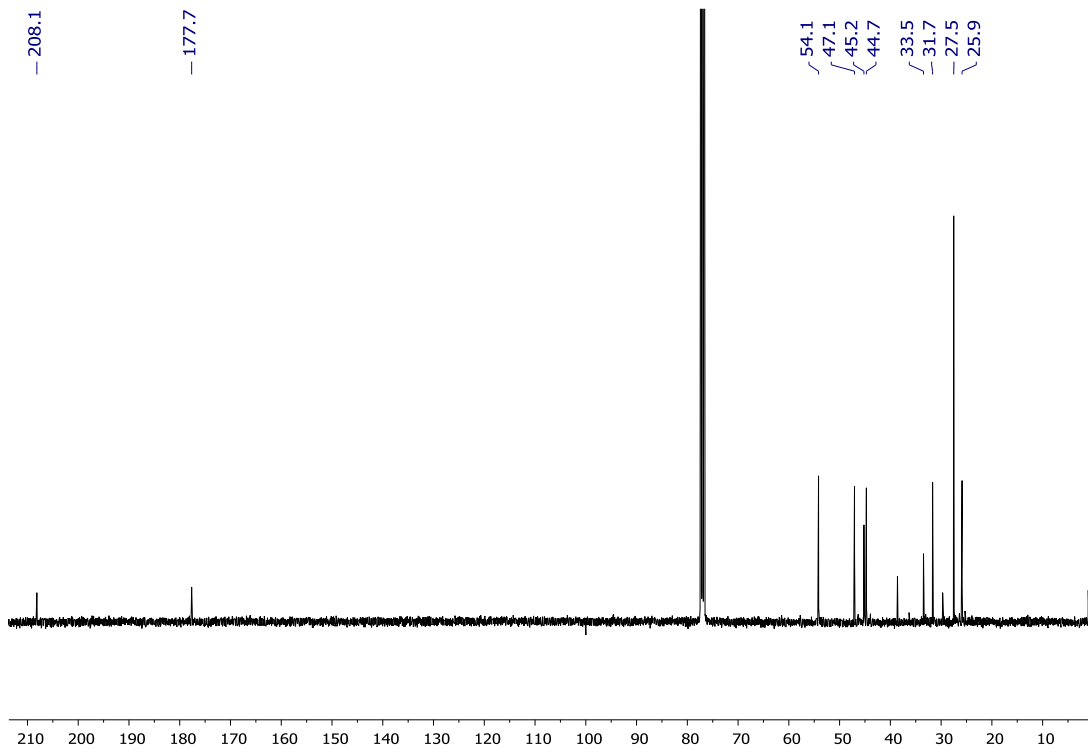

## A4 HPLC and GC spectra of products

The racemic products were obtained by using the racemic  $[\text{Mn}(\text{CF}_3\text{SO}_3)_2(\text{TIPS}^{\text{mcp}})]$  complex.

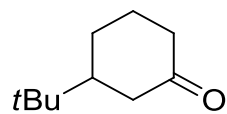

Rac

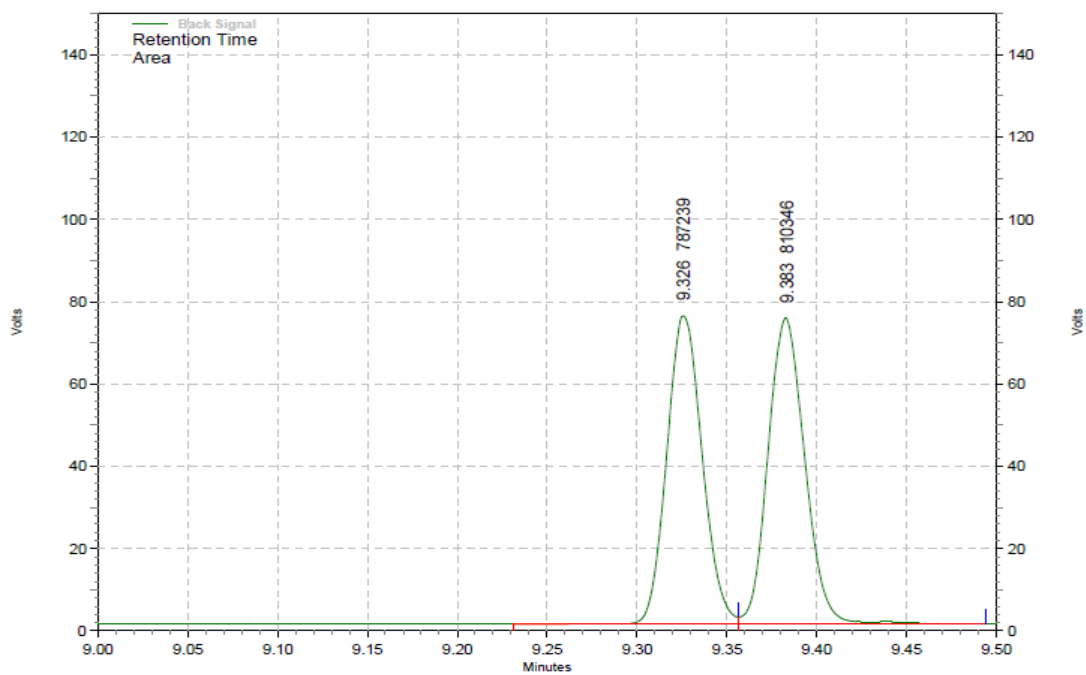

P1 (K<sub>3</sub>)

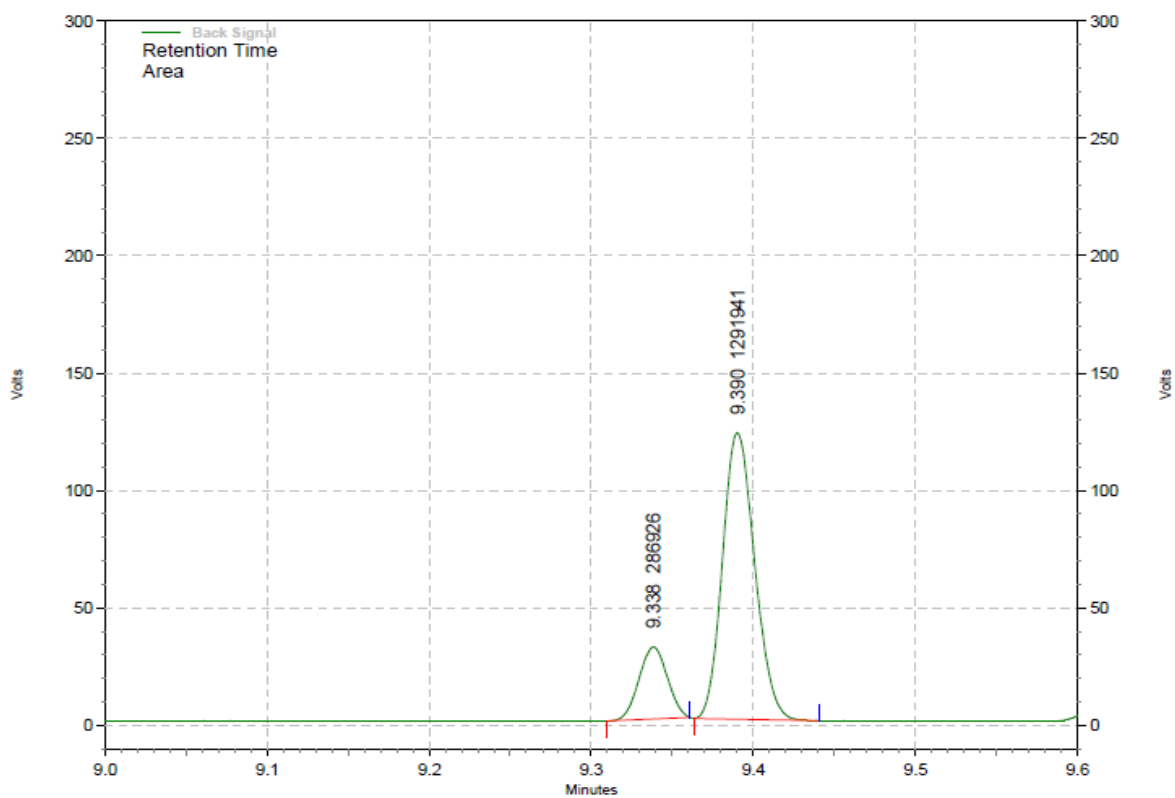

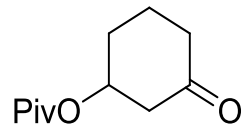

Rac

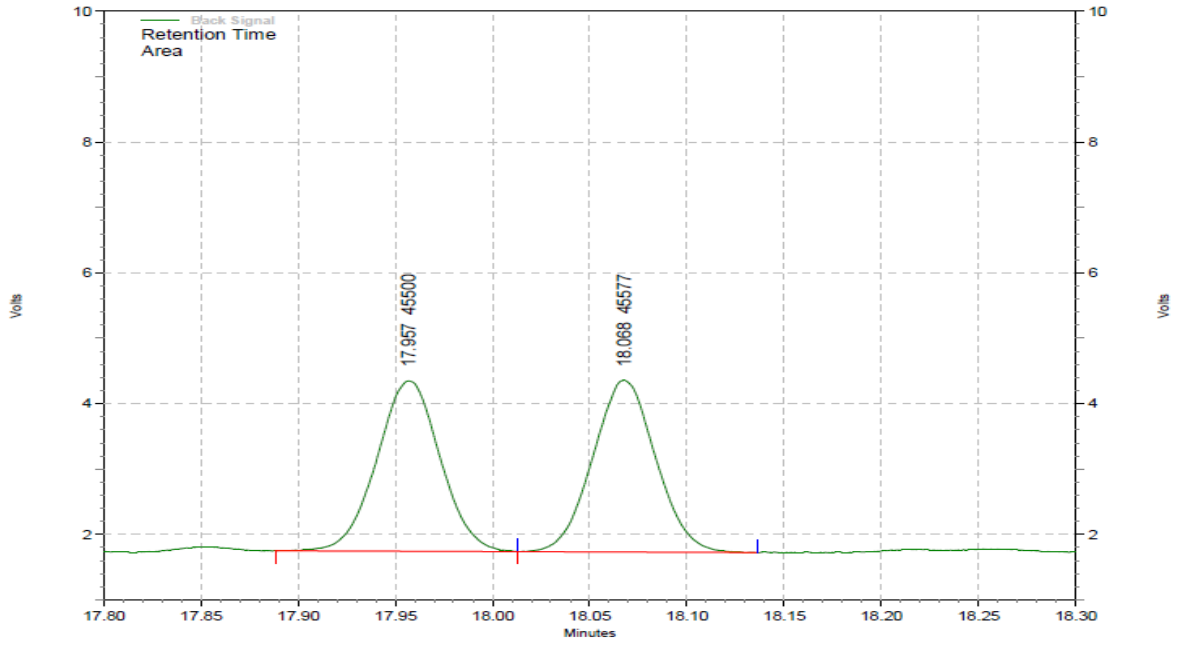

P2 (K<sub>3</sub>)

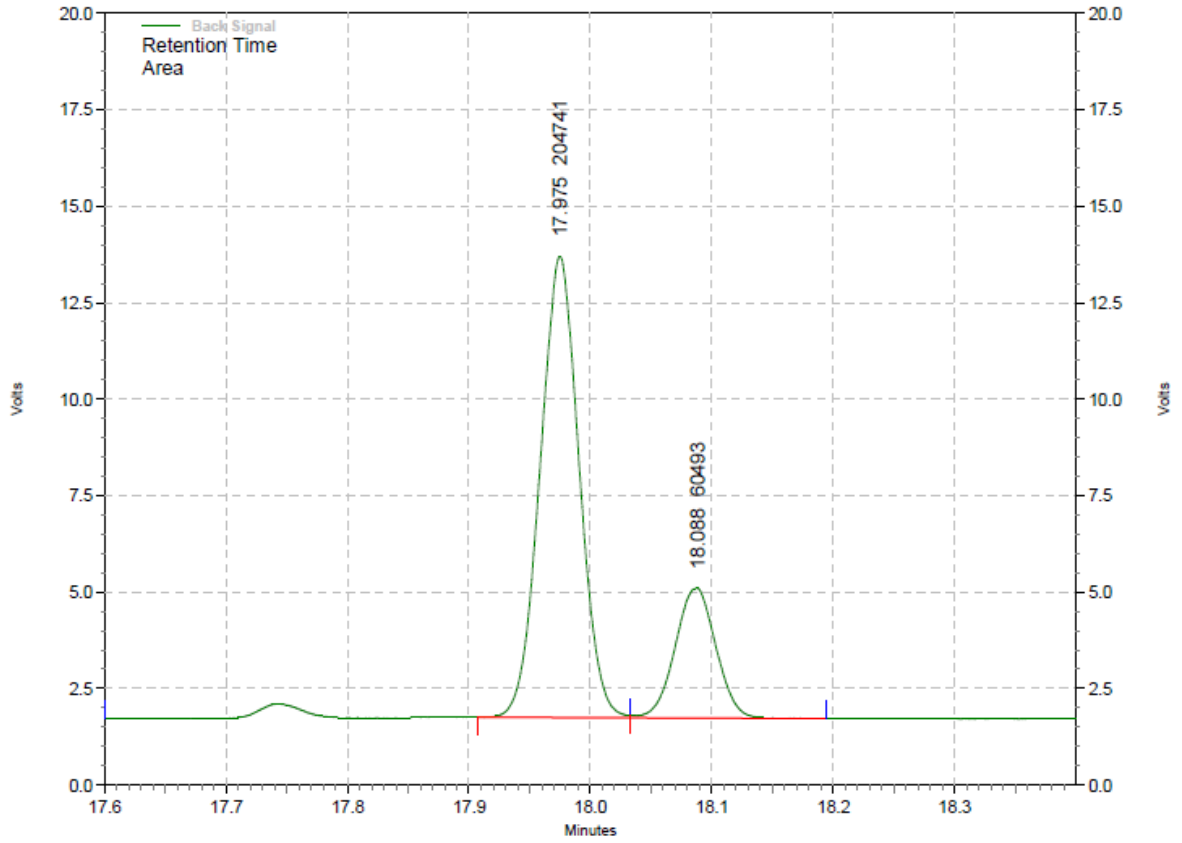



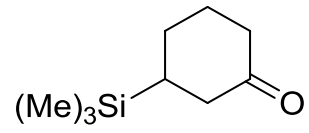

Rac

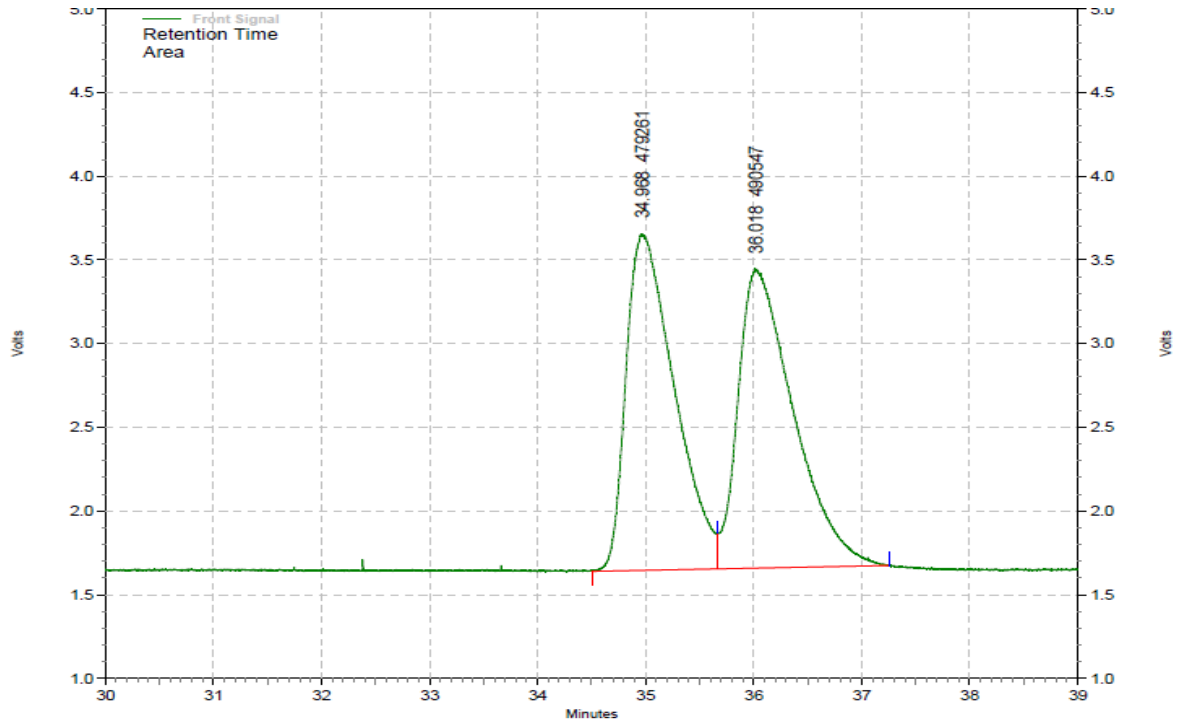

P3 (K<sub>3</sub>)

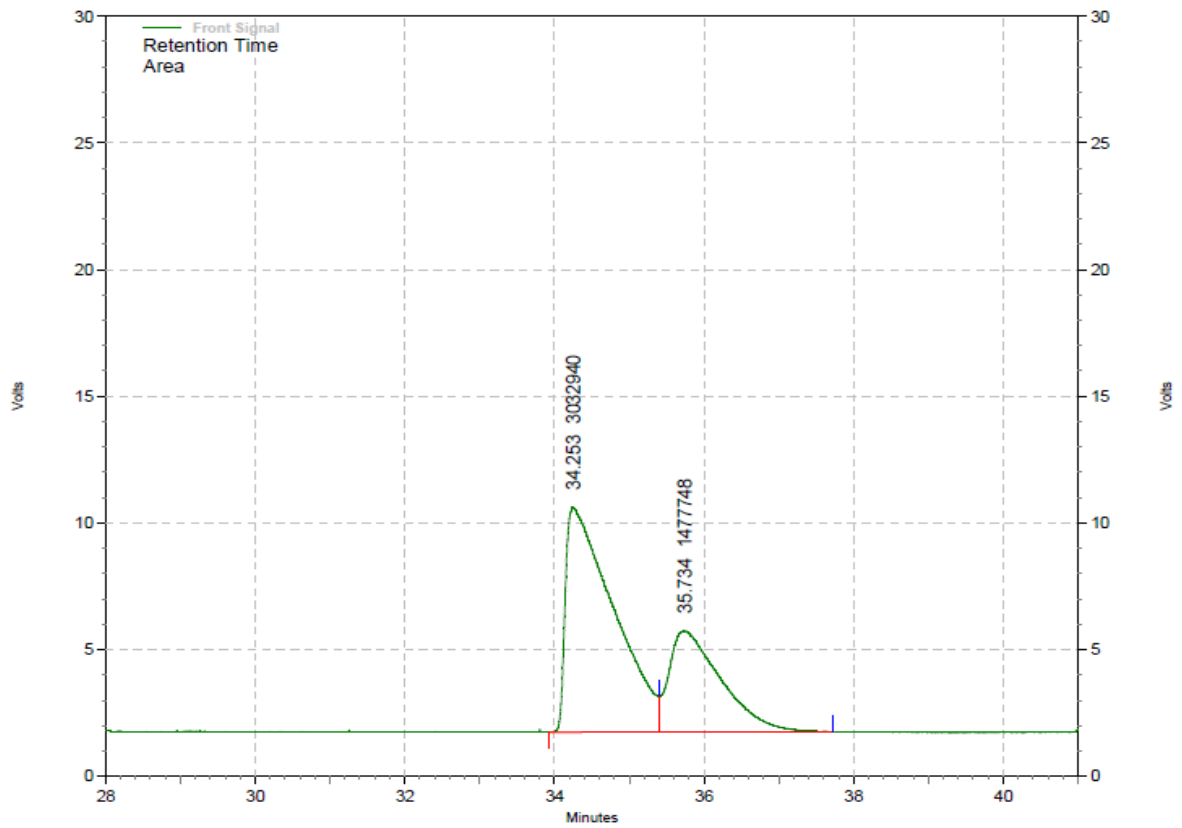

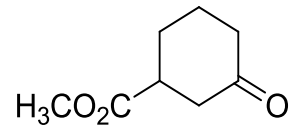

Rac

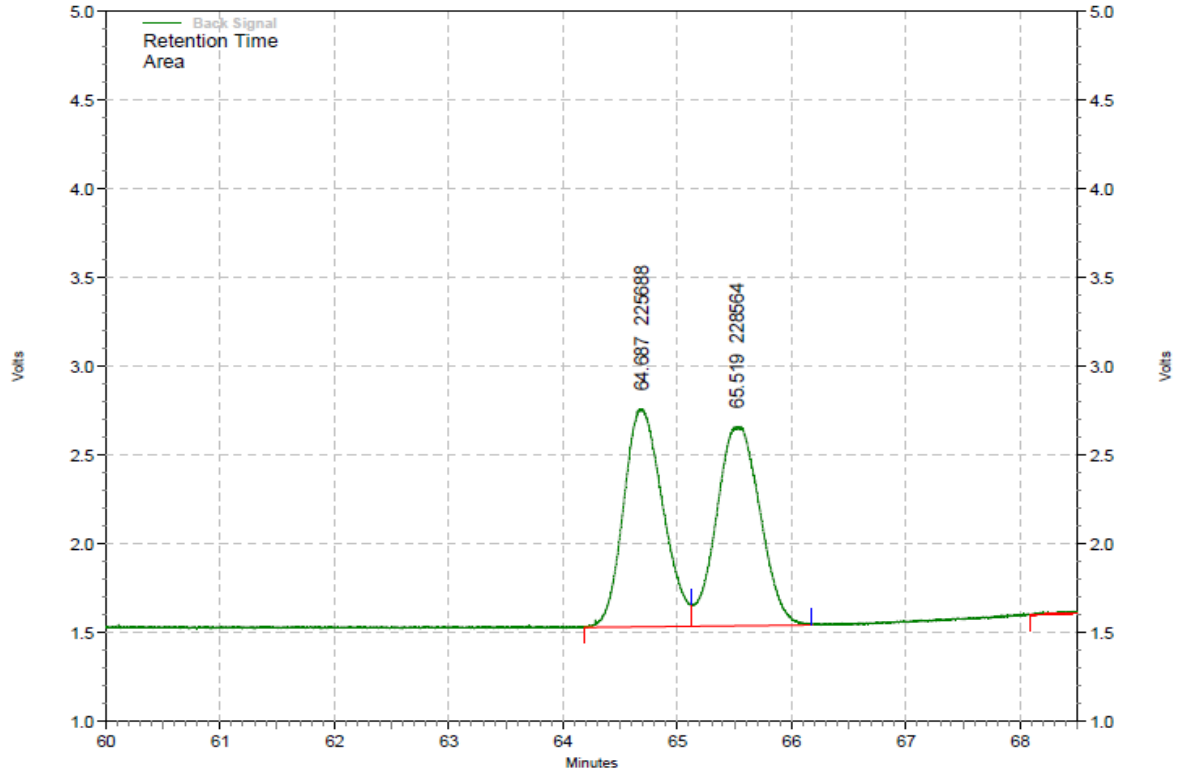

P4 (K<sub>3</sub>)

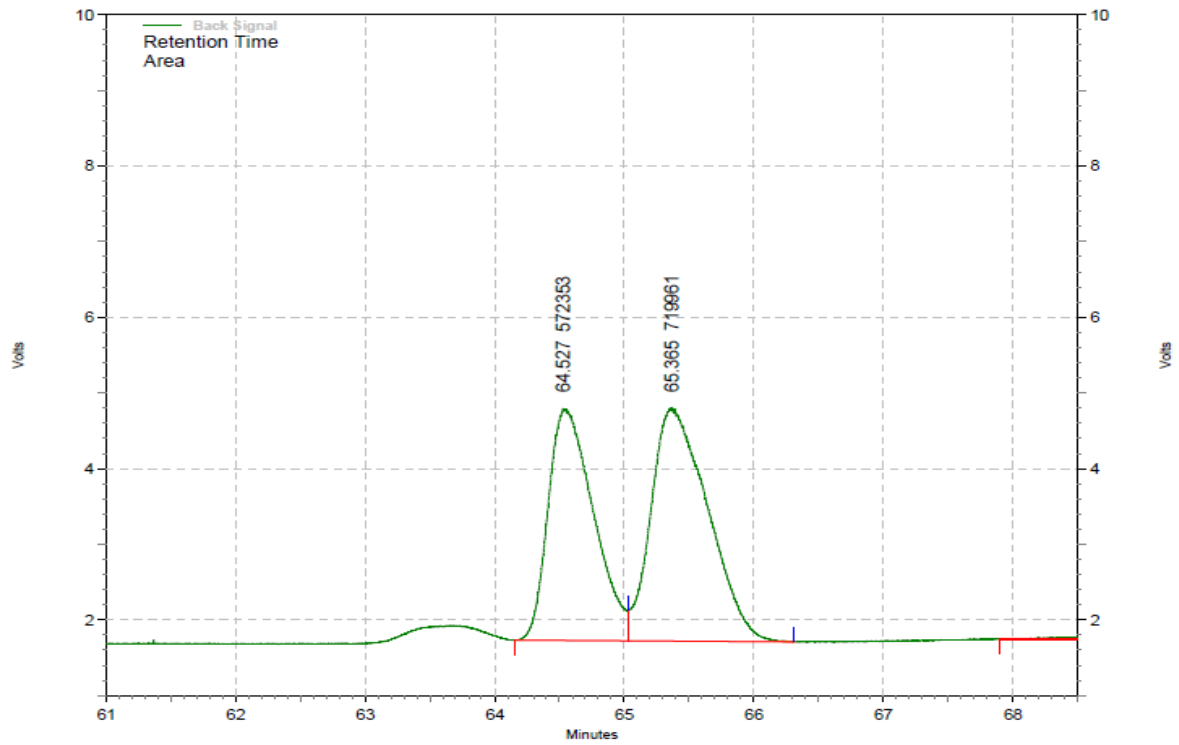

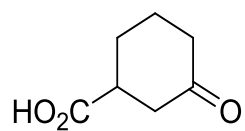

Rac

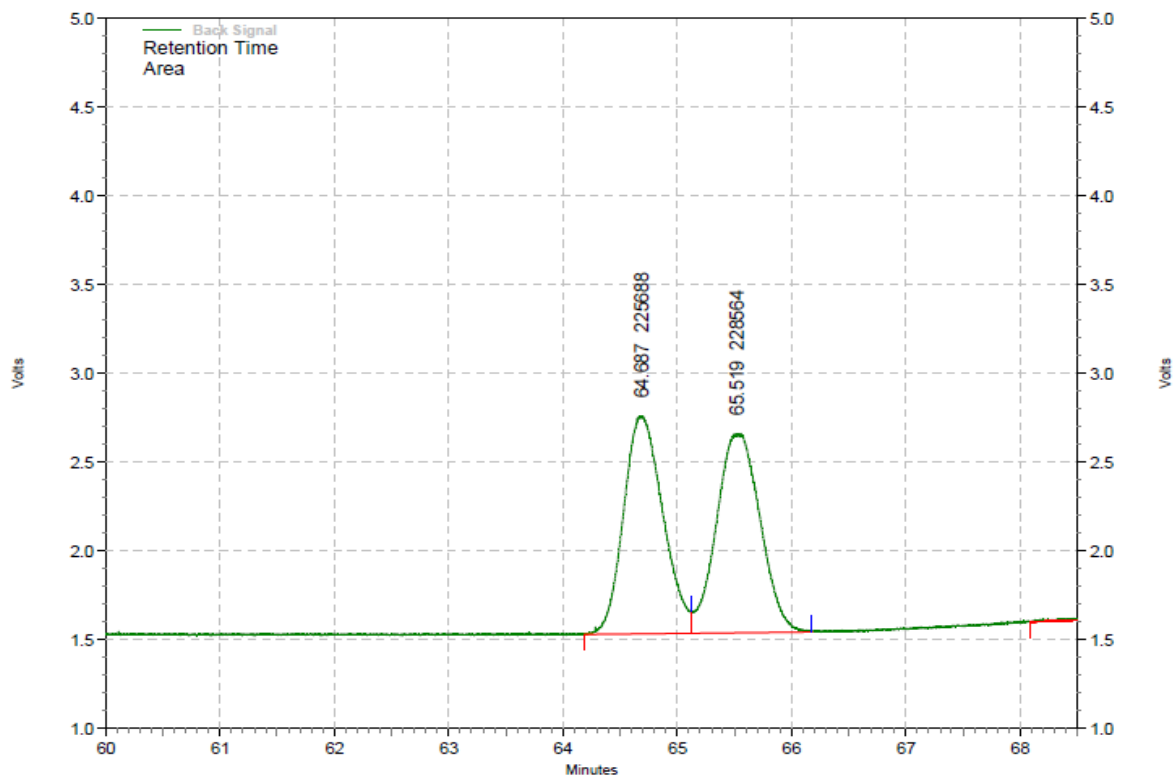

P5 (K<sub>3</sub>) after esterification

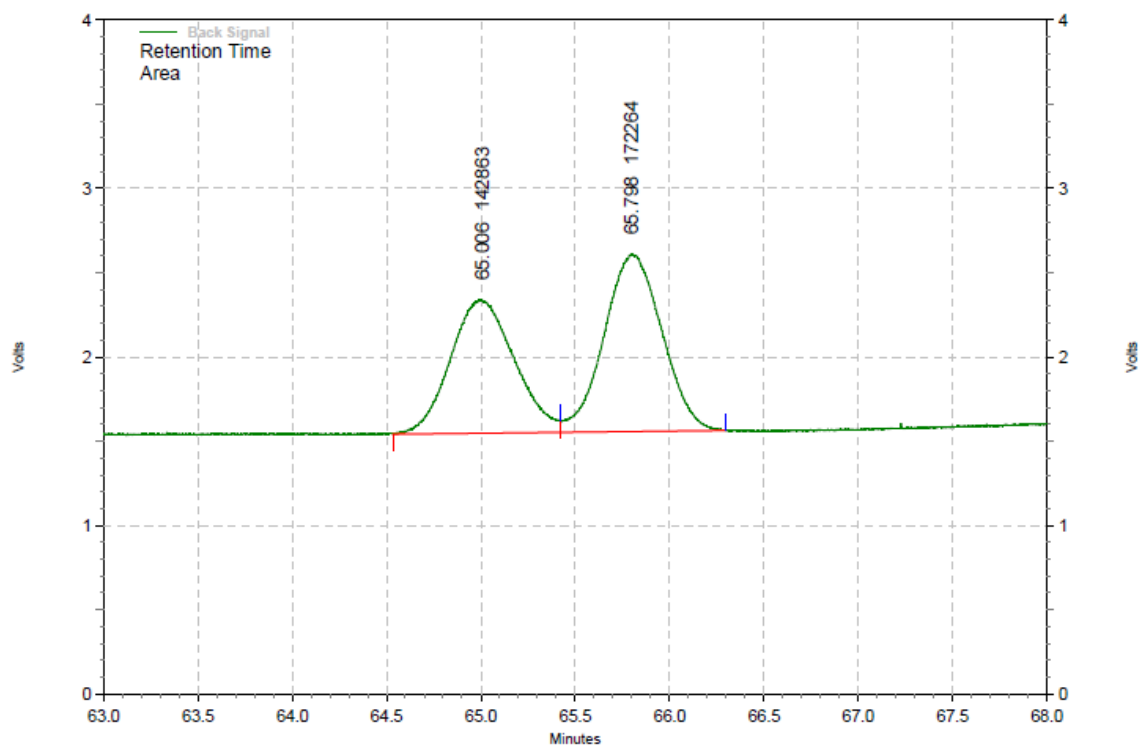

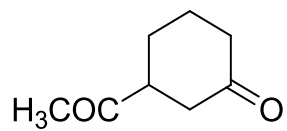

Rac

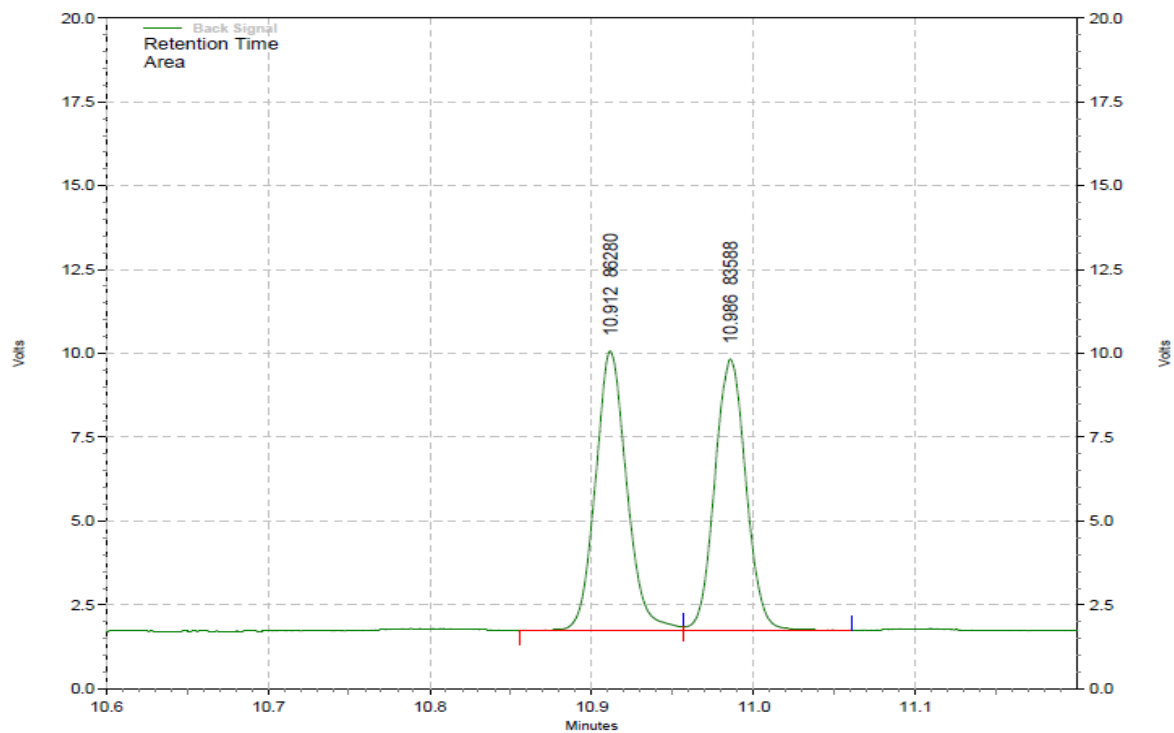

P6 (K<sub>3</sub>)

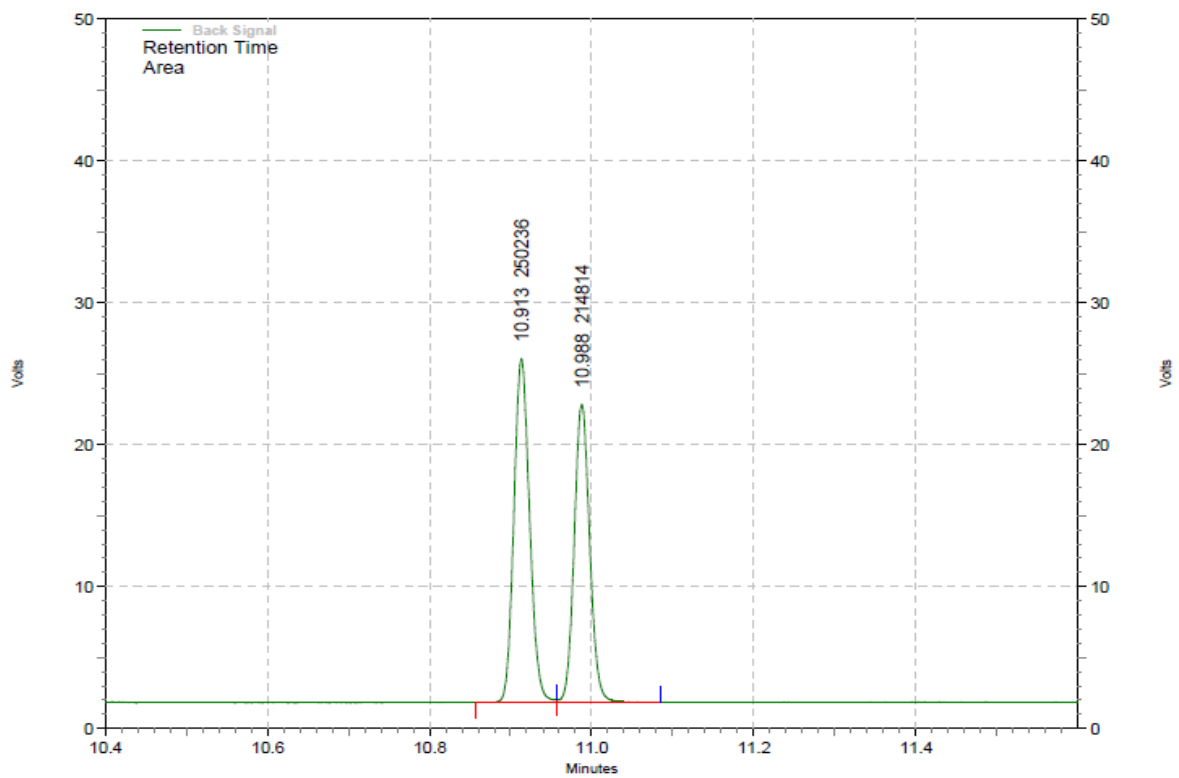

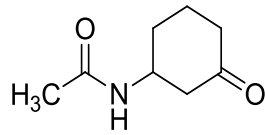

**Rac**

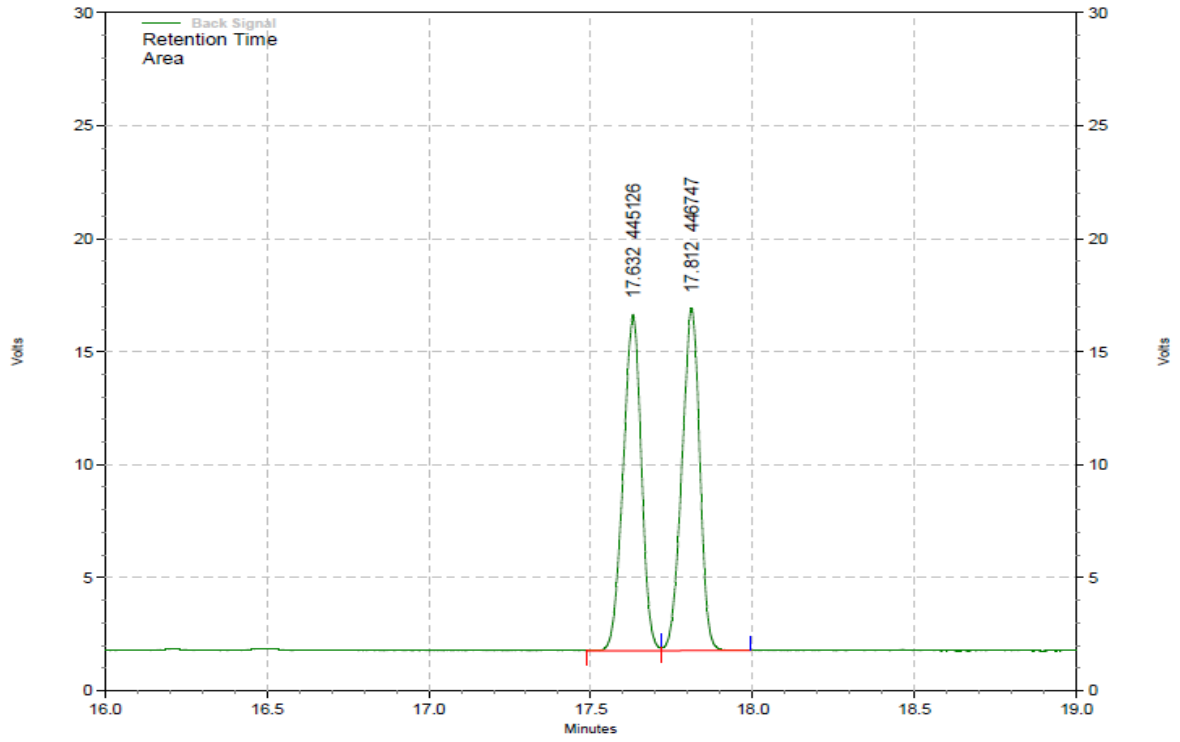

**P7**

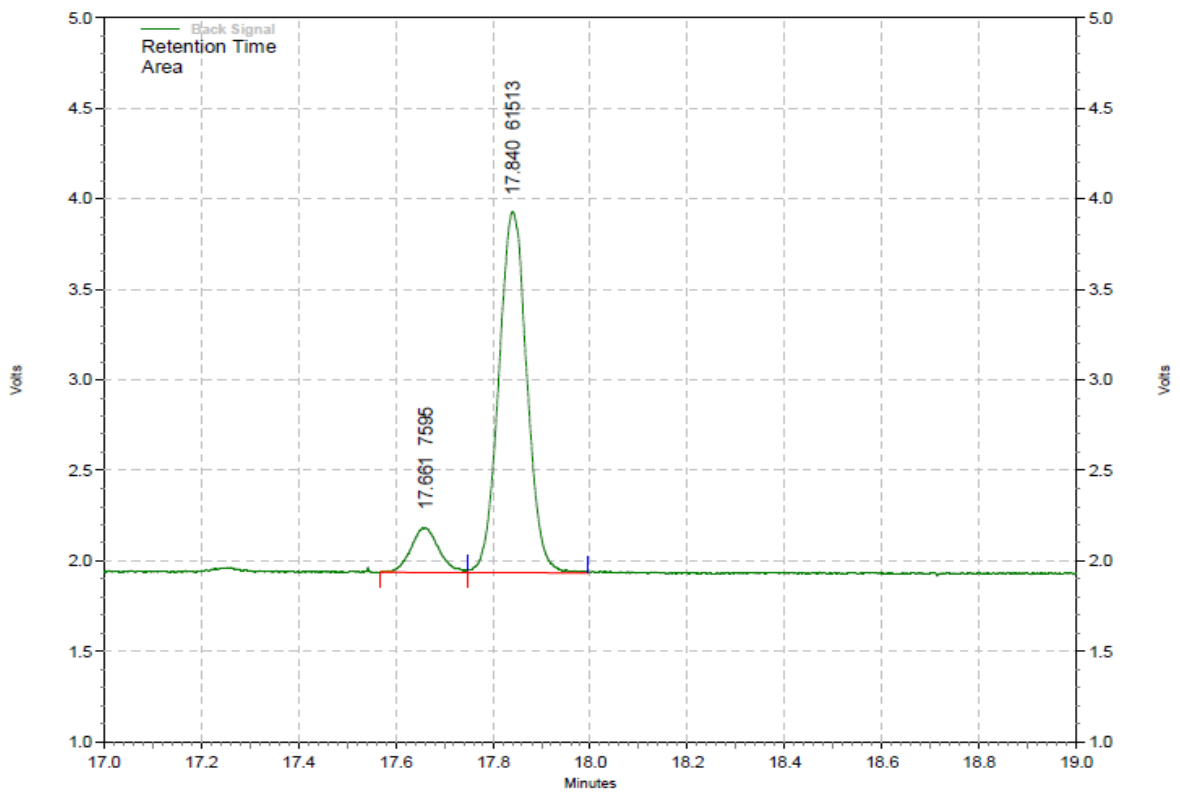

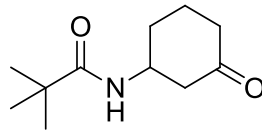

Rac

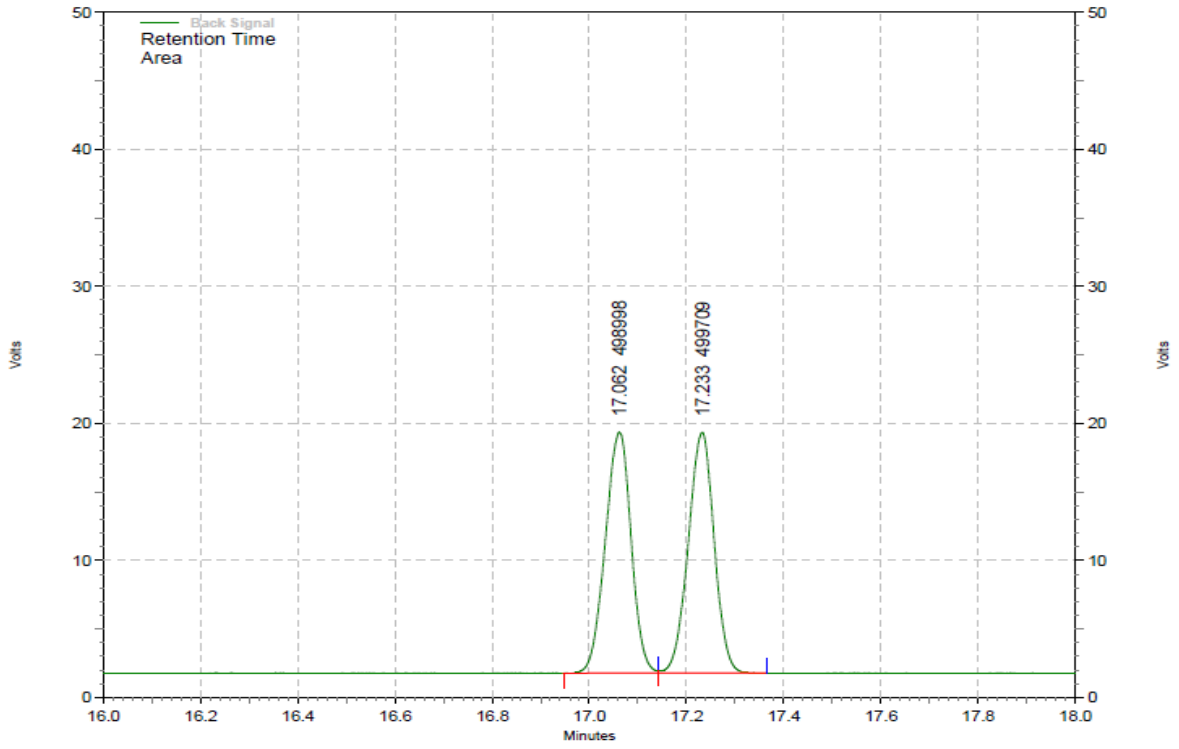

P8 (S,S)-(TIPS<sup>ecp</sup>)

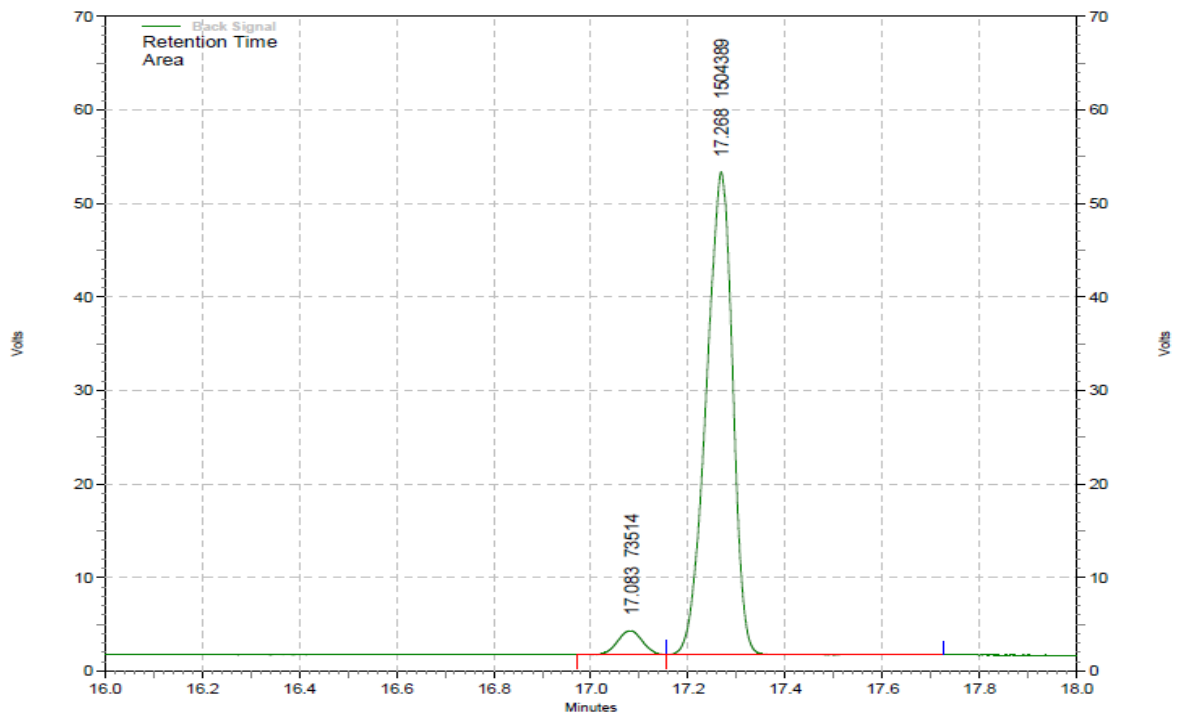

### P8 (R,R)-(TIPS)mcp

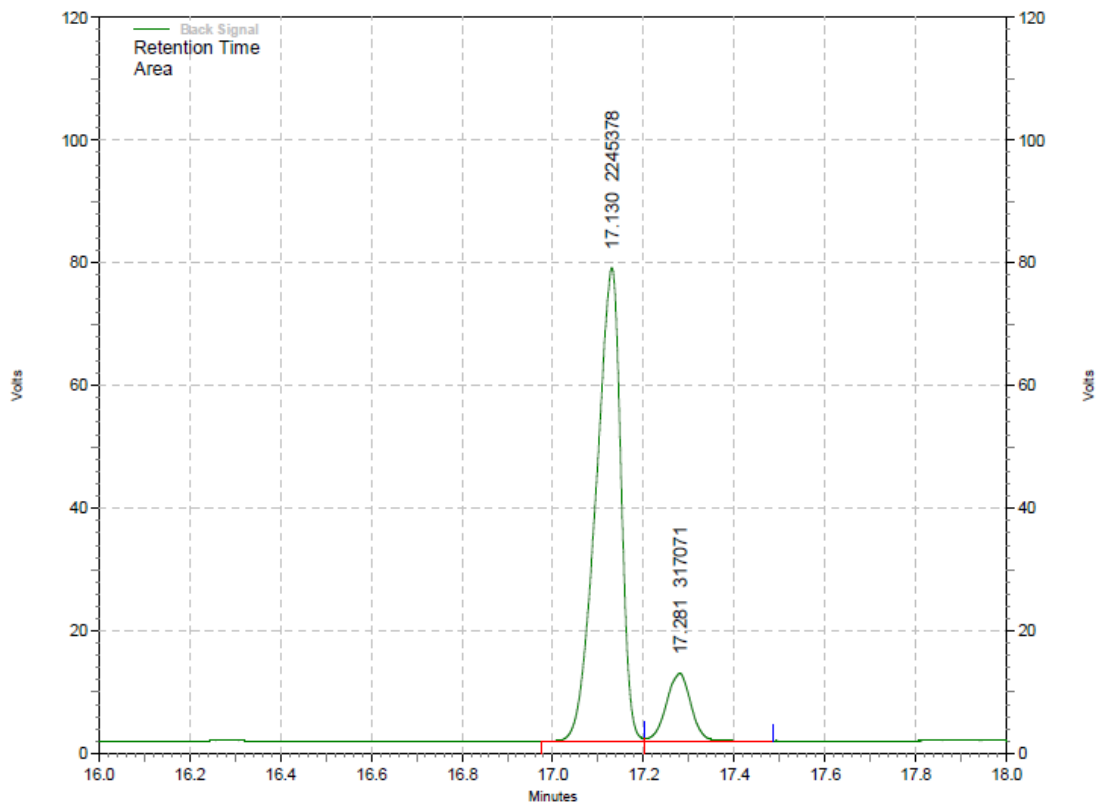

### P8 (S,S)-(TIPS)mcp

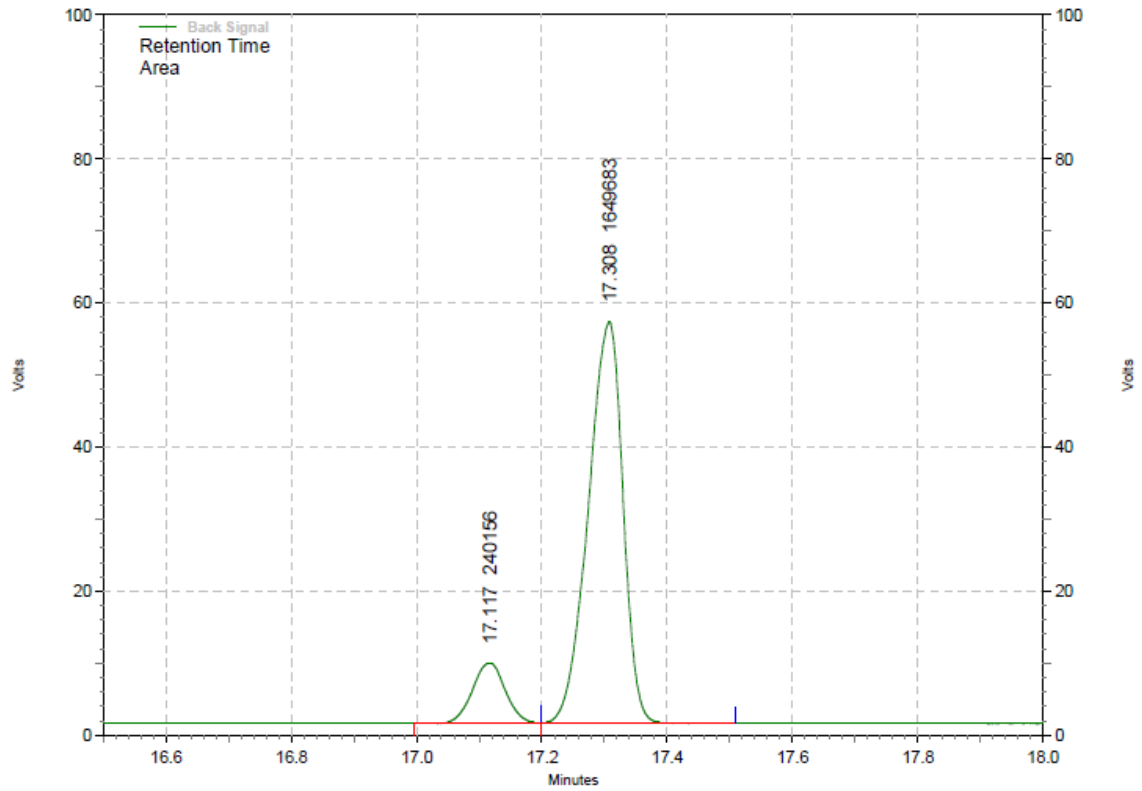

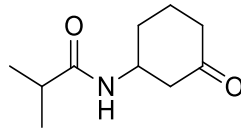

Rac

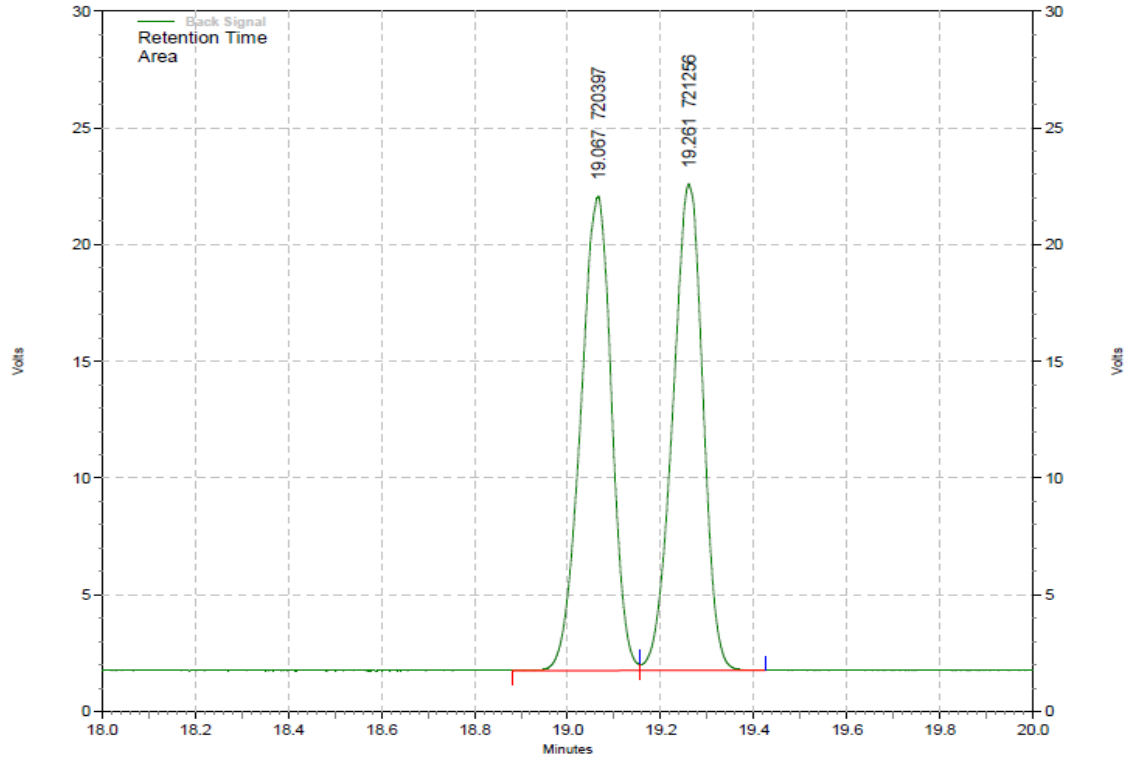

P9

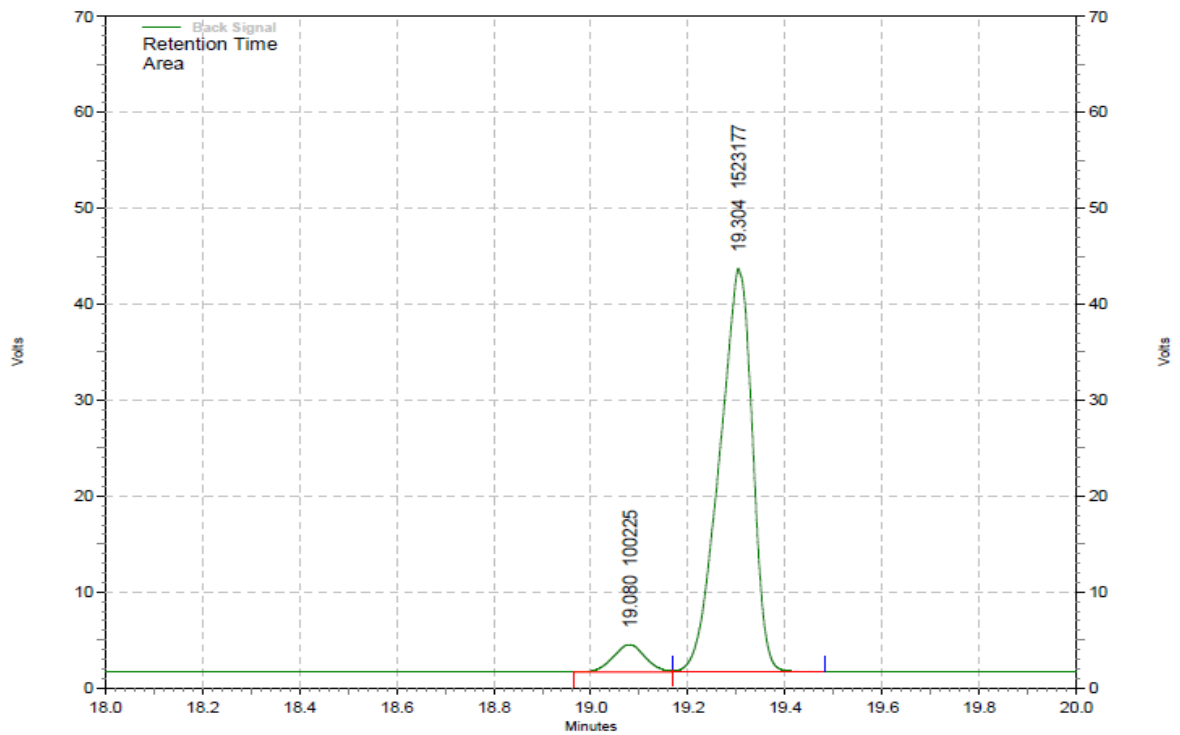





Rac

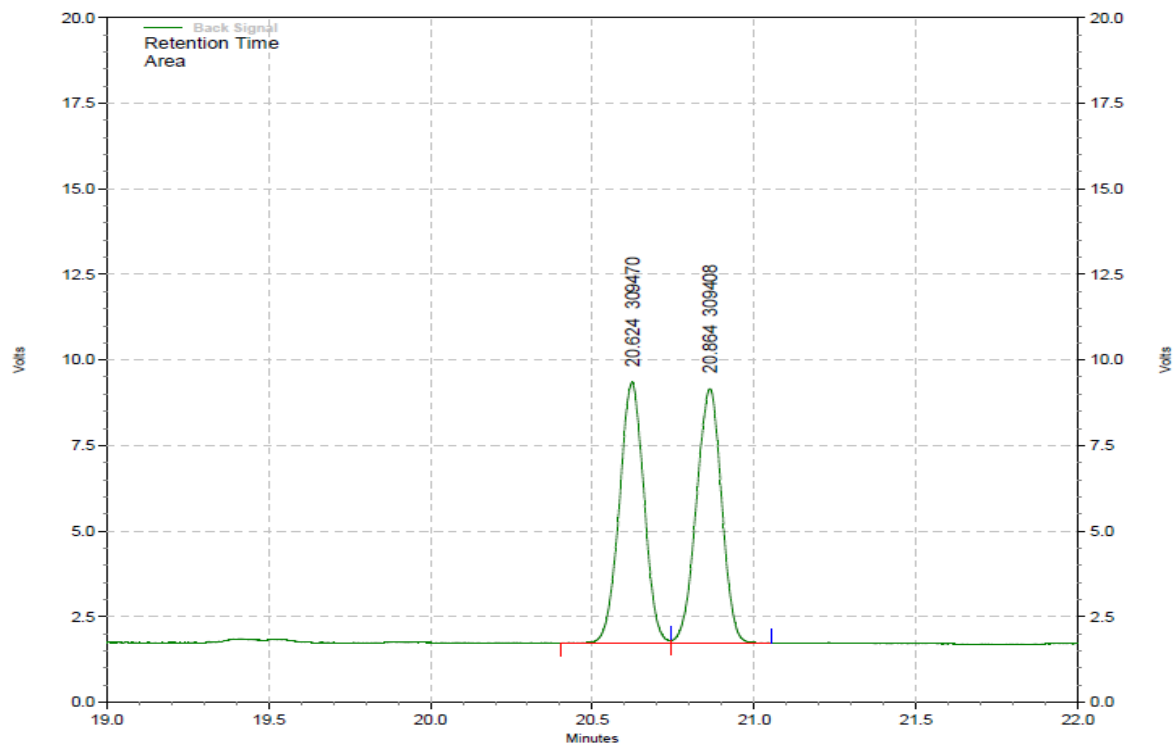

P10

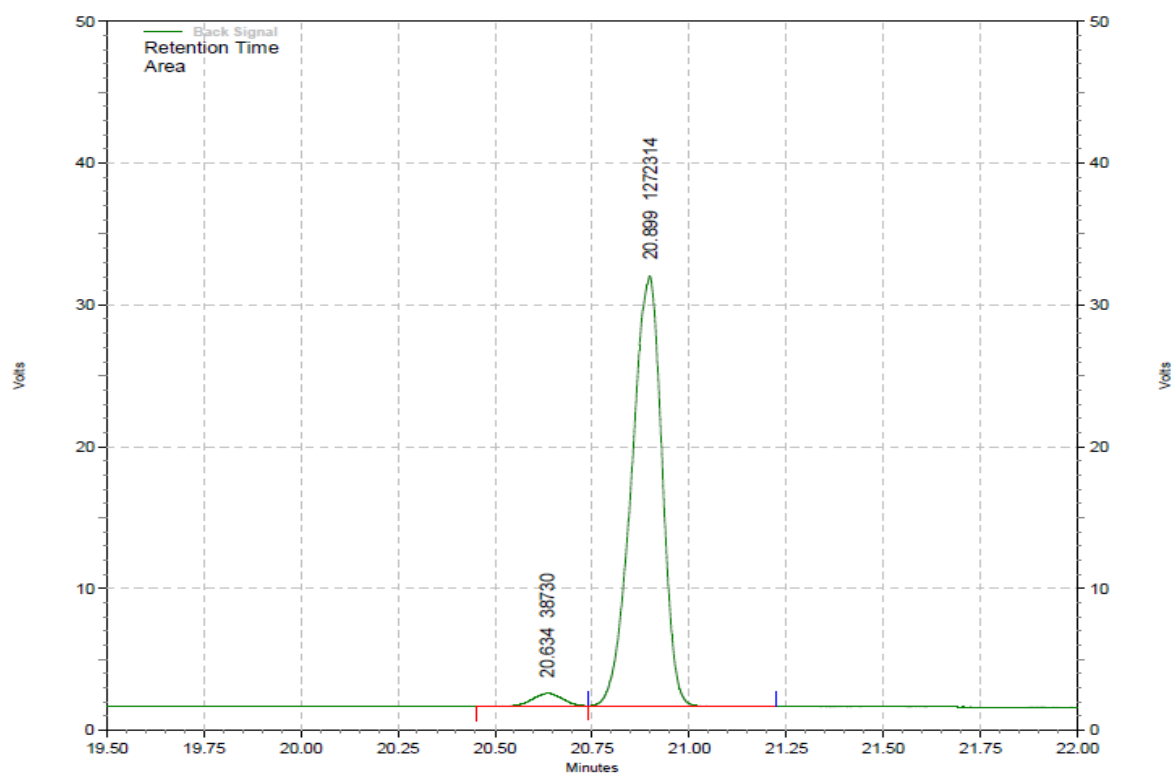



Rac

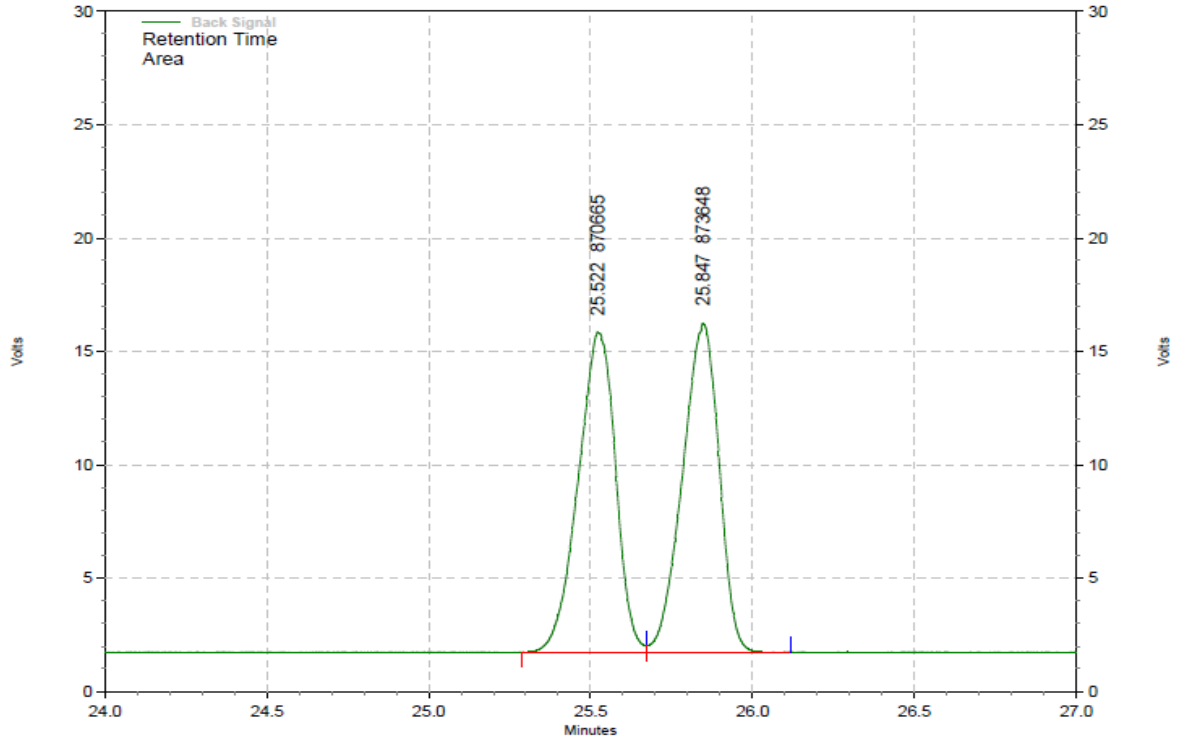

P11

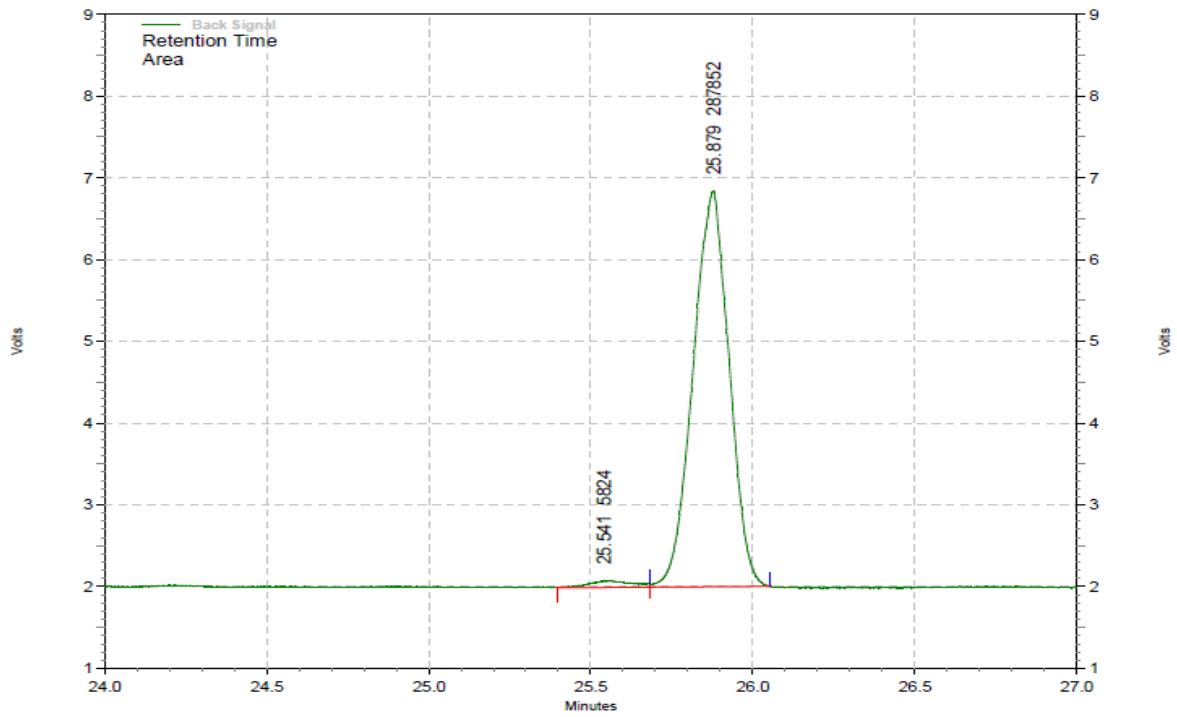

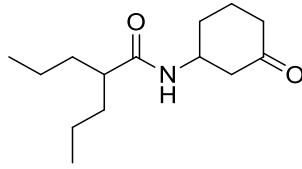

**Rac**

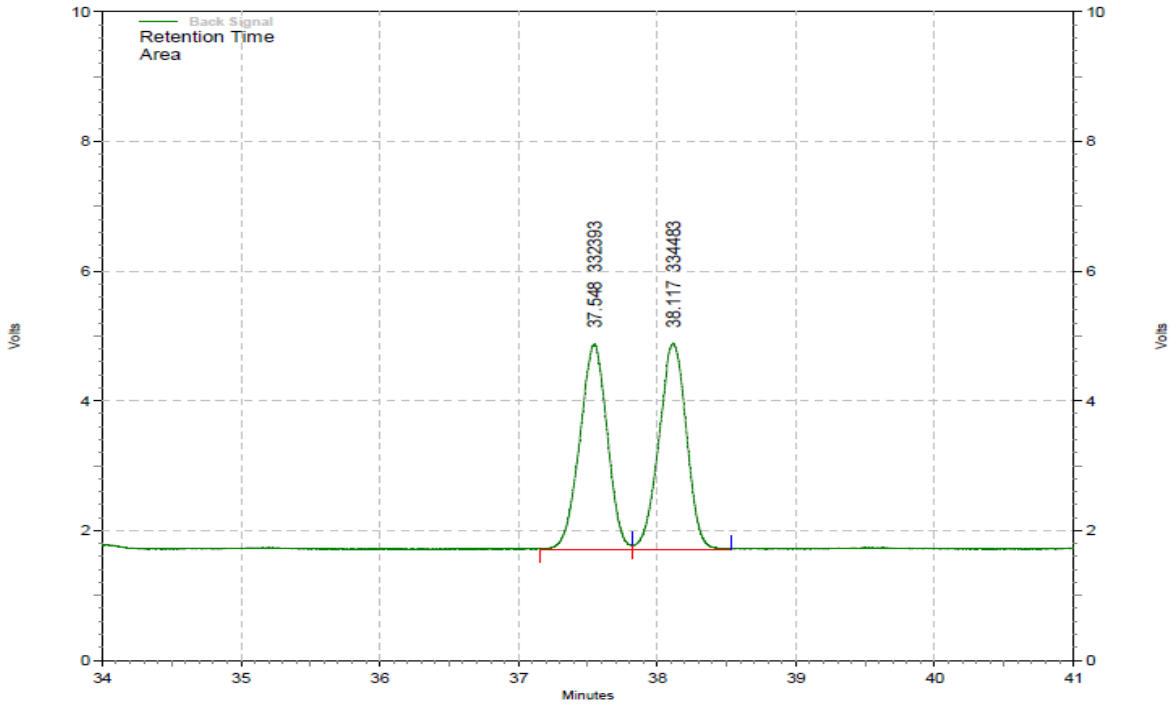

**P12**

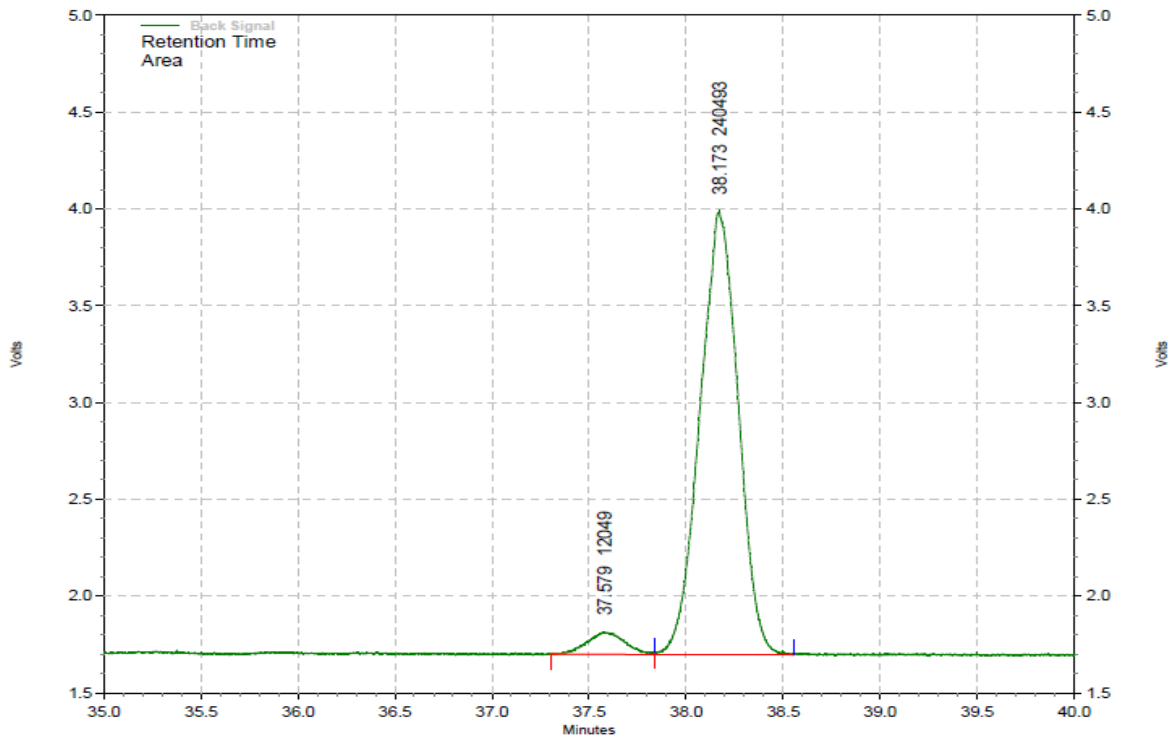

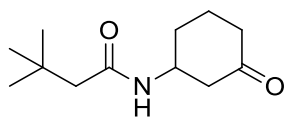

Rac

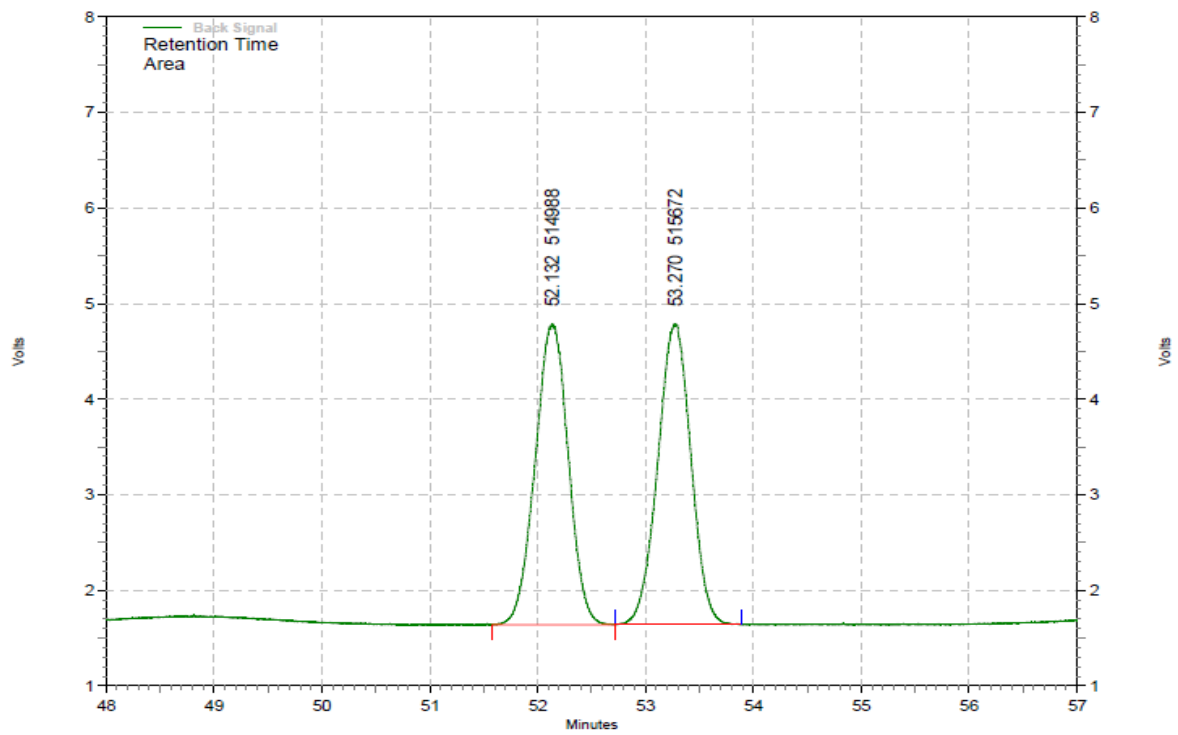

P13

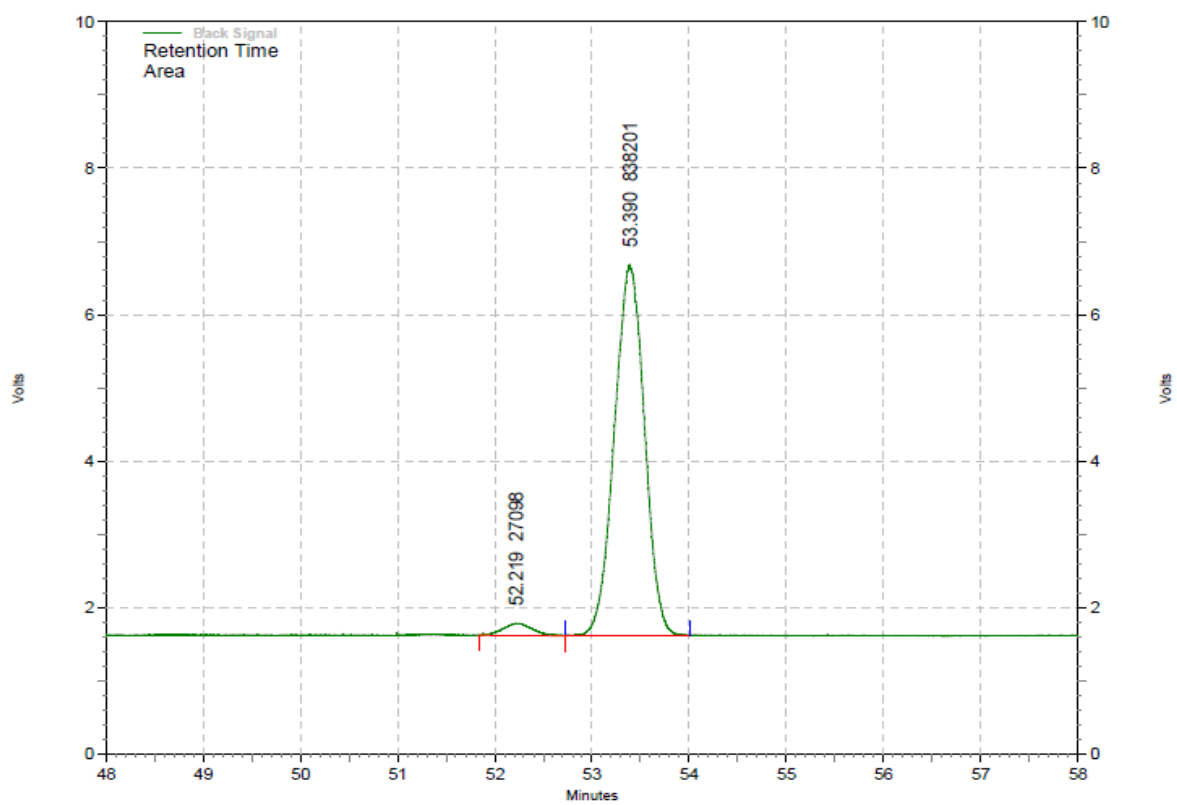

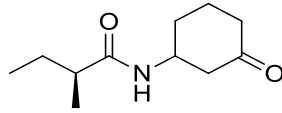

Rac

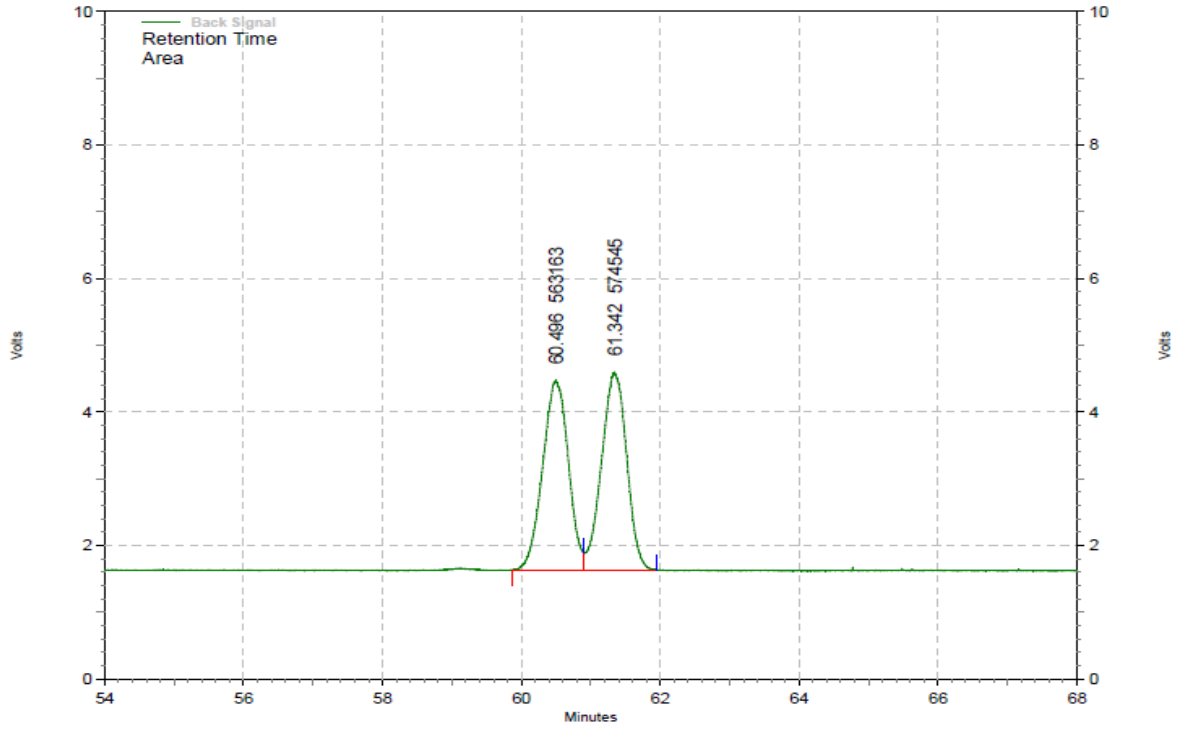

P14

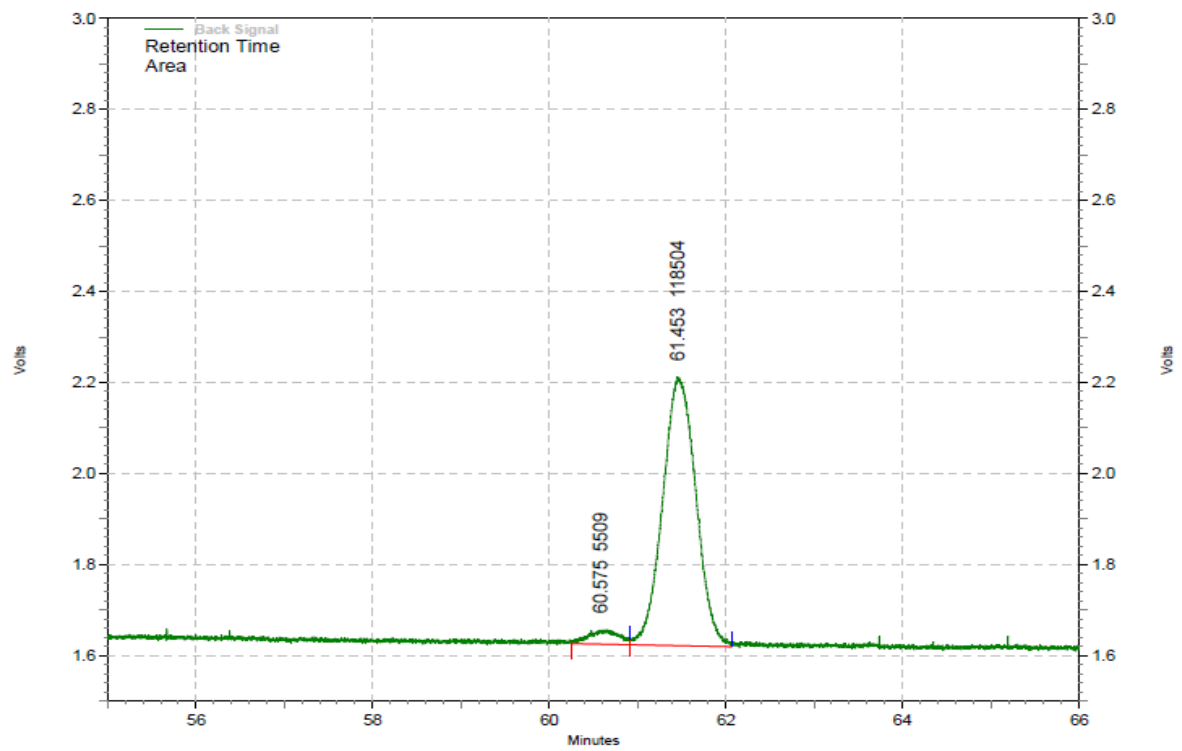

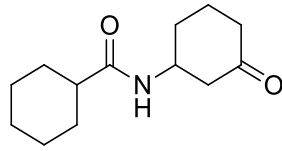

**Rac**

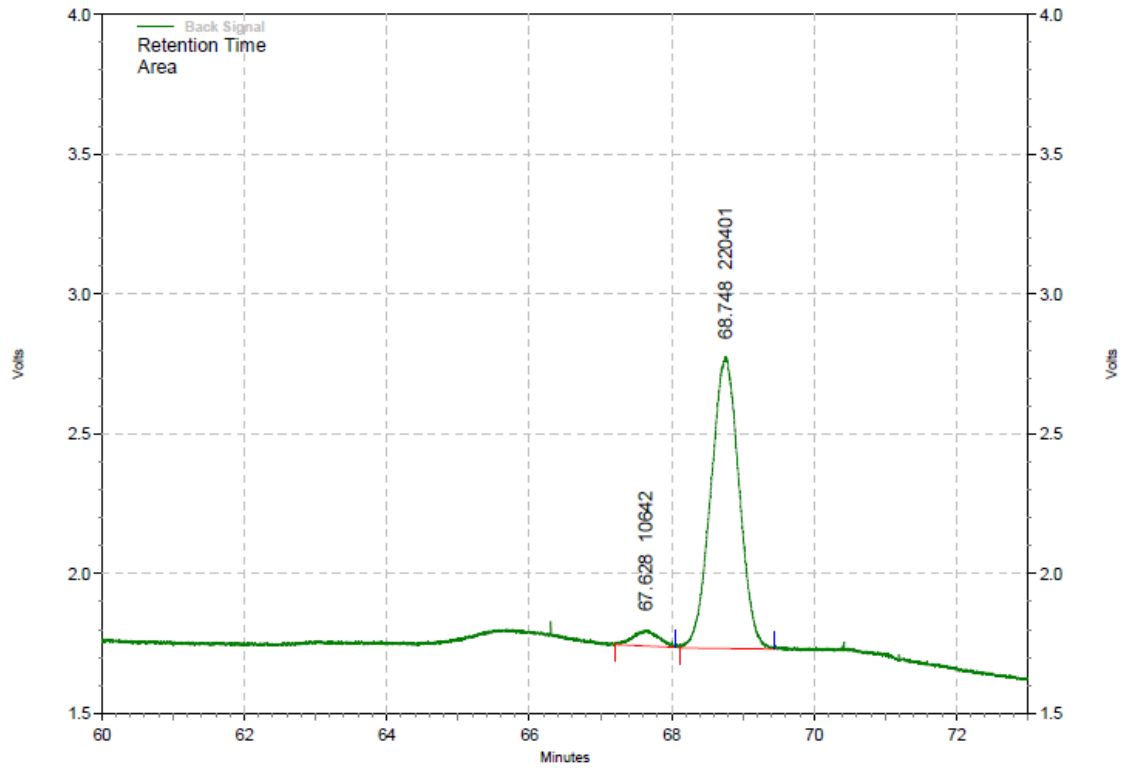

**P15**

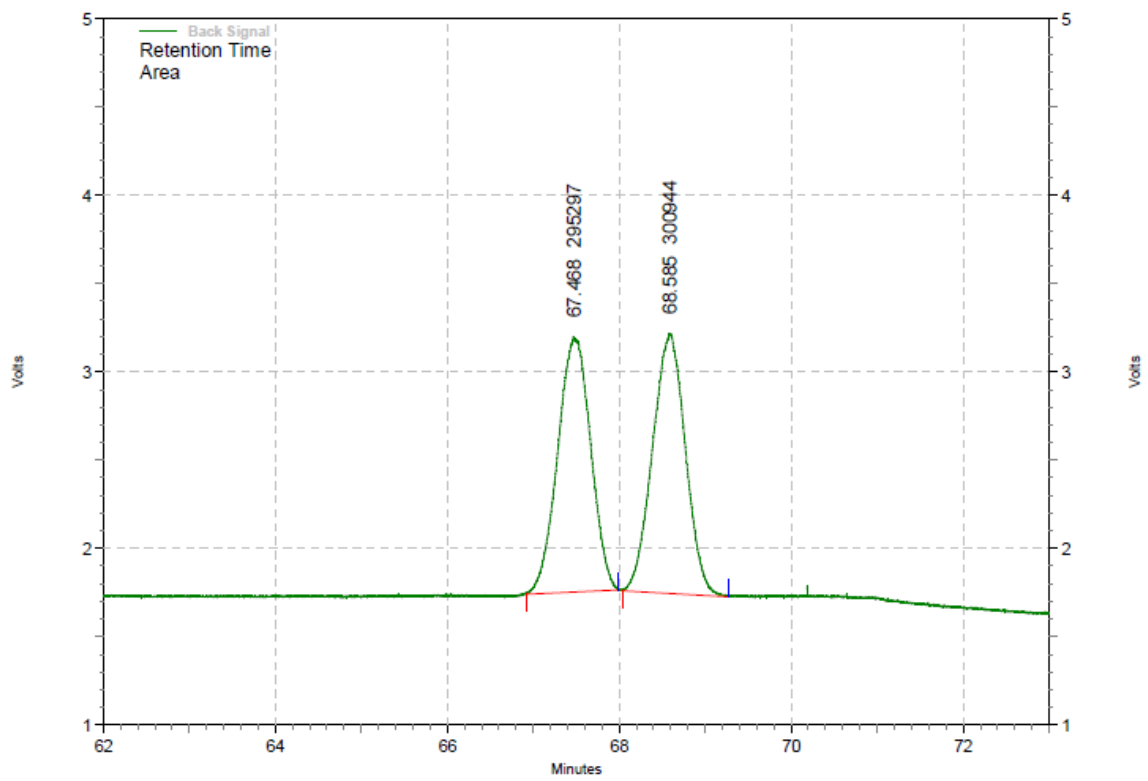

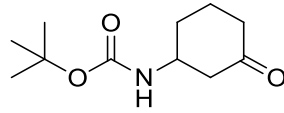

**Rac**

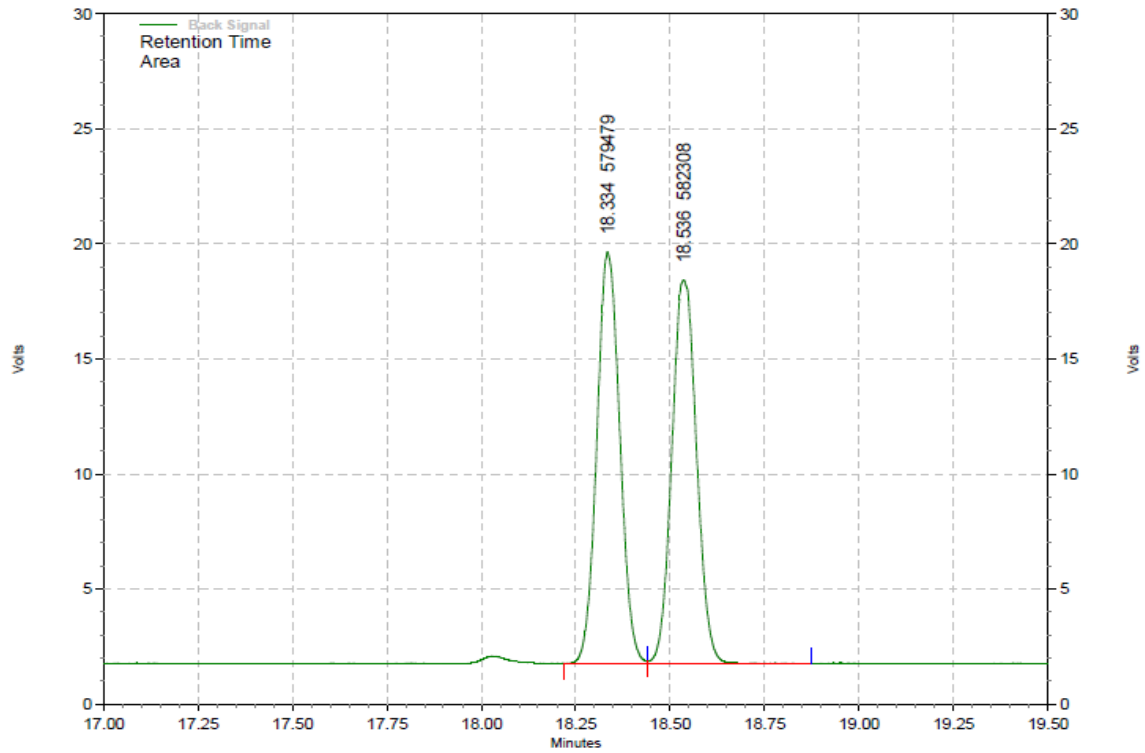

**P16**

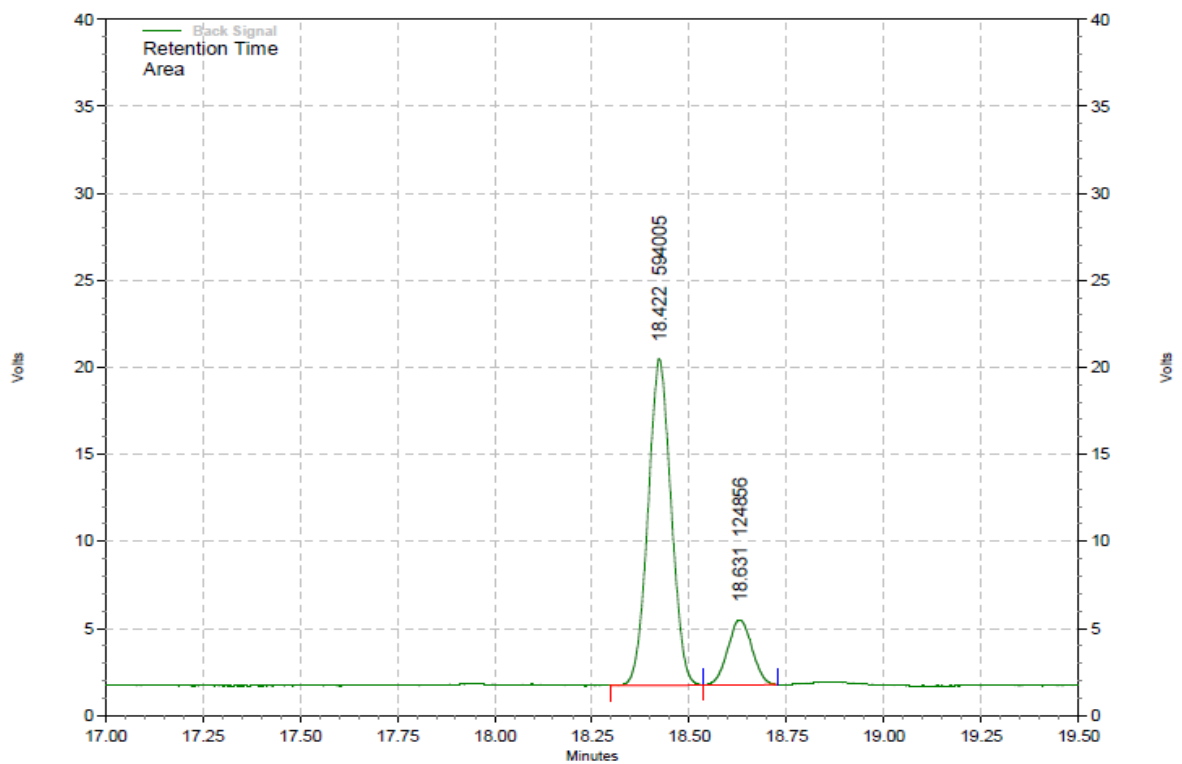

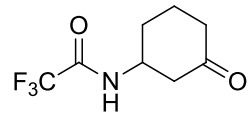

Rac

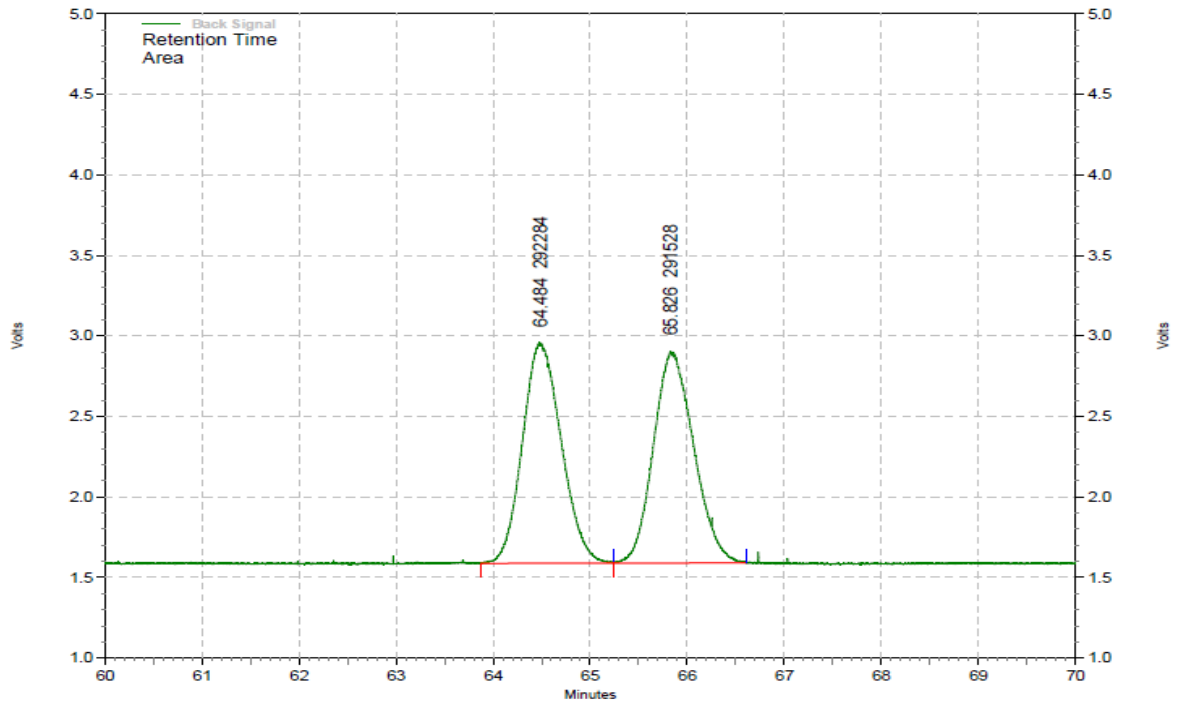

P17

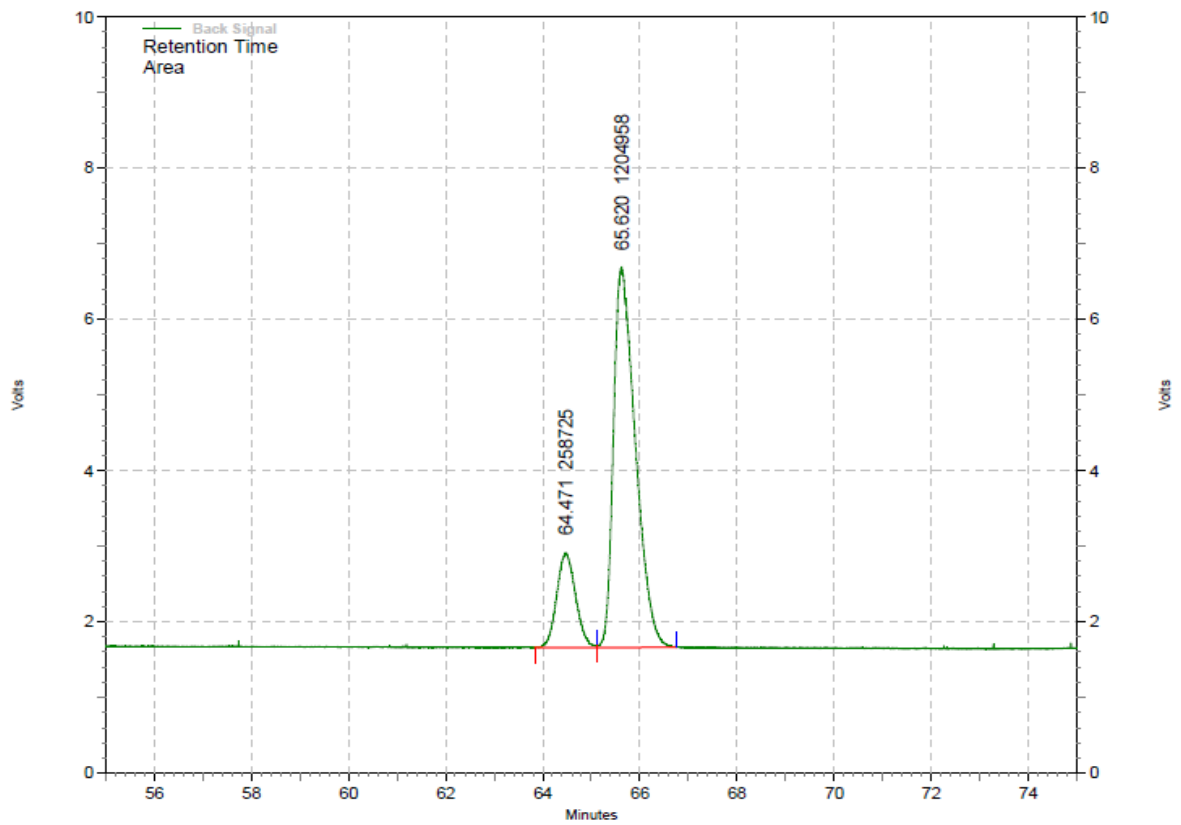



HPLC-separation conditions: Chiralpack IA 25°C, 240.8 nm, 88/12 hexane/*i*-PrOH, 1.0 mL/min;  
 r.t.(*minor*) = 26.166 min, r.t.(*major*) = 27.910 min.

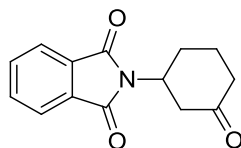

**Rac**

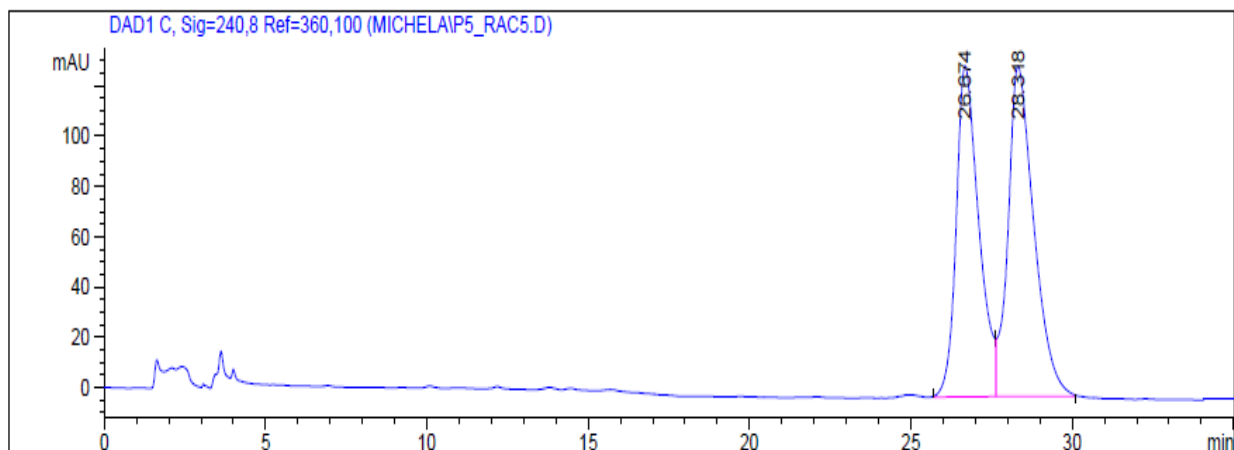

| Peak # | RetTime [min] | Sig | Type | Area [mAU*s] | Height [mAU] | Area %  |
|--------|---------------|-----|------|--------------|--------------|---------|
| 1      | 26.674        | 1   | BV   | 6397.72949   | 131.63432    | 46.6248 |
| 2      | 28.318        | 1   | VB   | 7323.99268   | 131.42468    | 53.3752 |

**P18 (K<sub>3</sub>)**

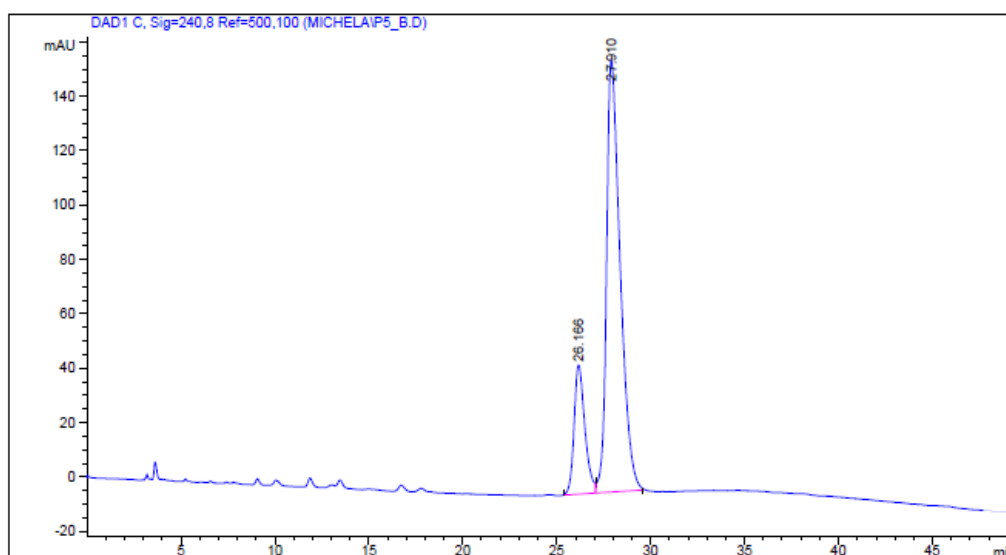

| Peak # | RetTime [min] | Type | Width [min] | Area [mAU*s] | Height [mAU] | Area %  |
|--------|---------------|------|-------------|--------------|--------------|---------|
| 1      | 26.166        | BV   | 0.5937      | 1895.62903   | 47.48789     | 19.1476 |
| 2      | 27.910        | VB   | 0.7504      | 8004.47949   | 158.72383    | 80.8524 |

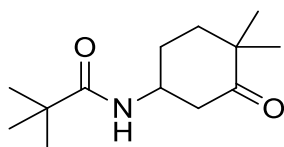

Rac

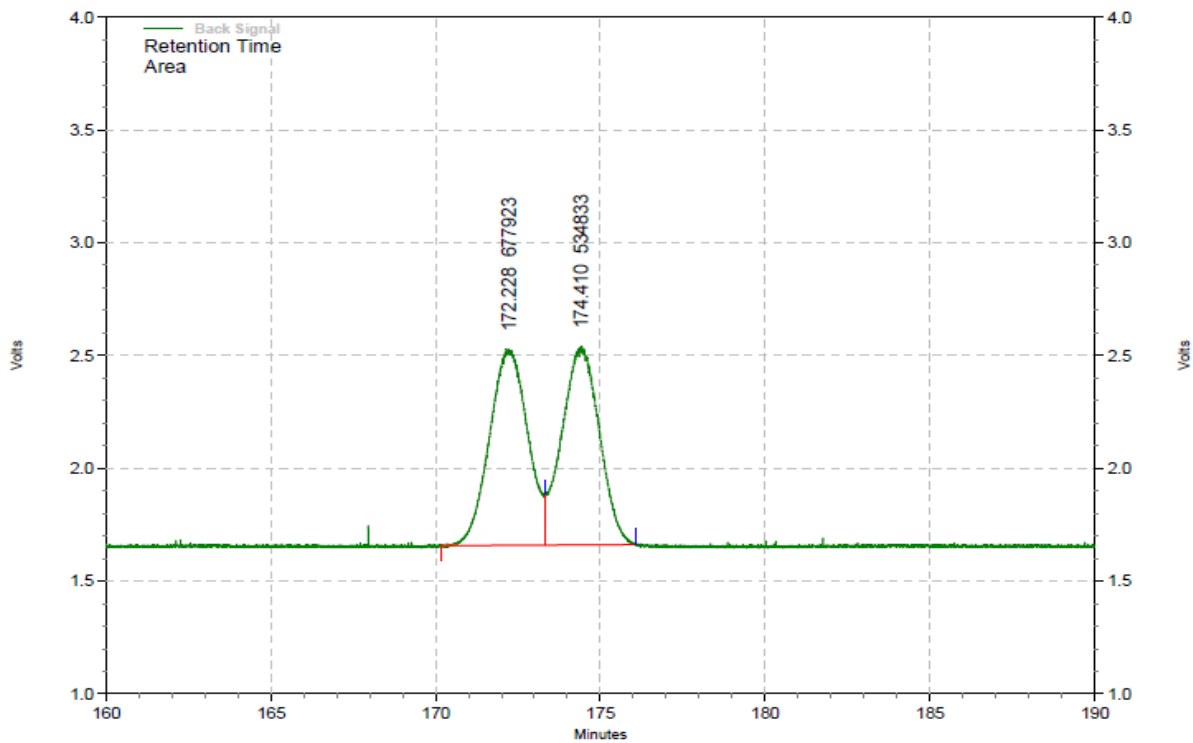

P20

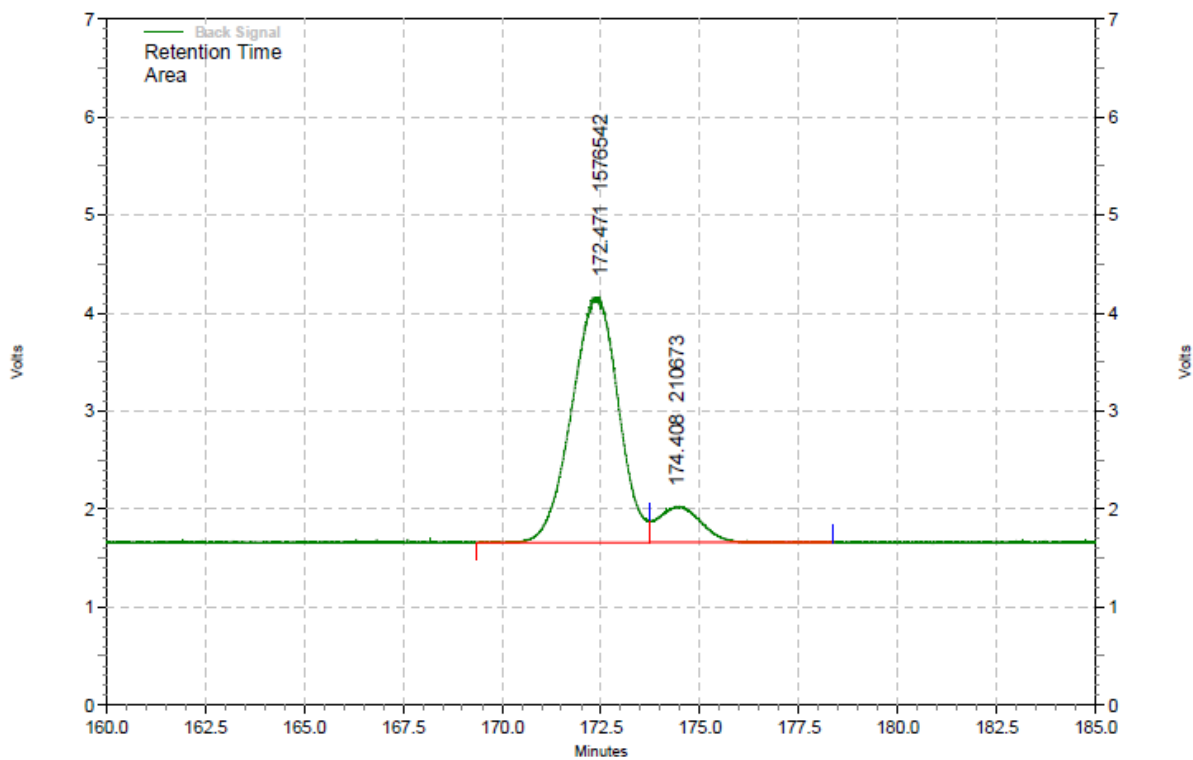

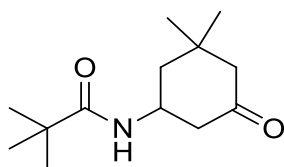

**Rac**

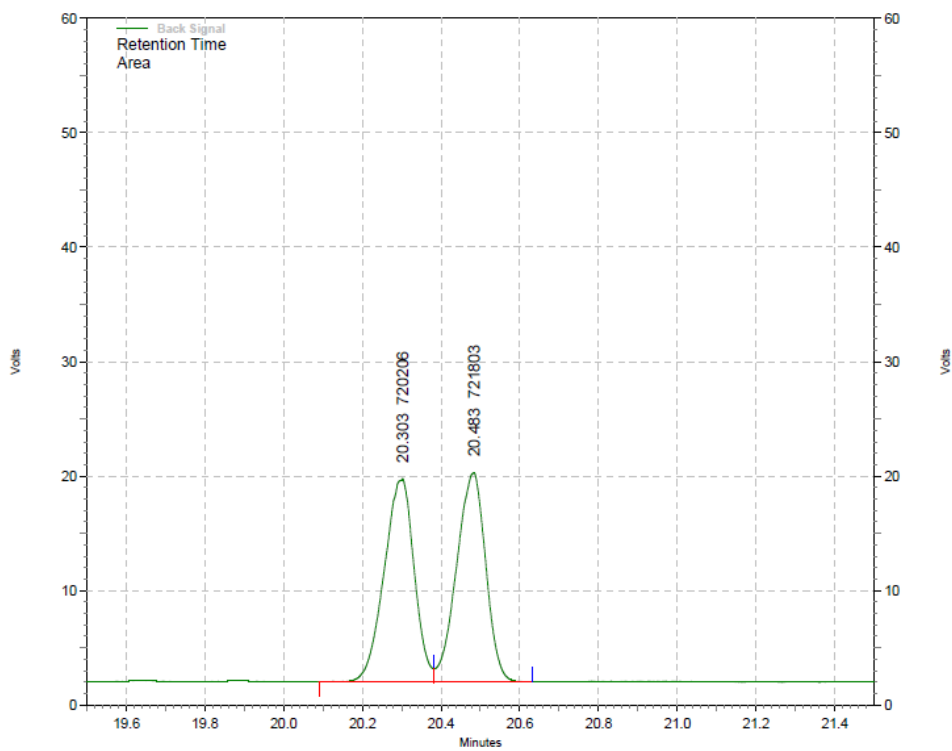

**P21**

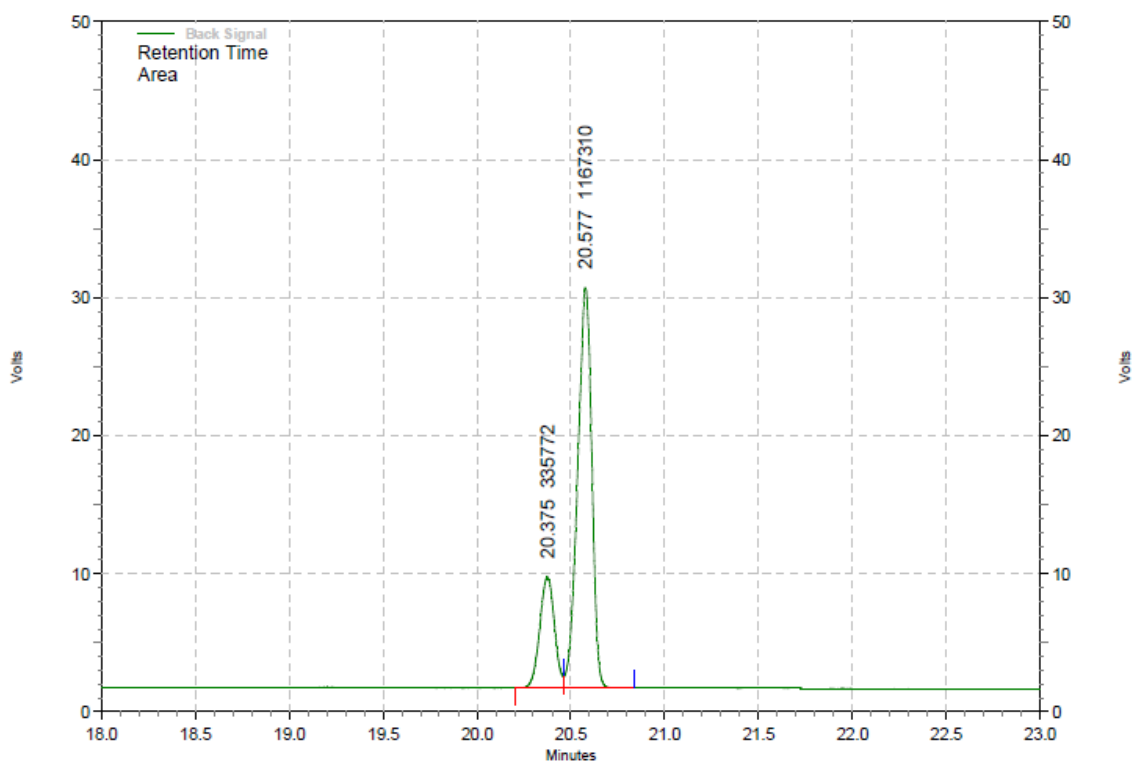

Chiral resolution of **S21**:

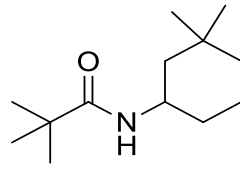

**Rac**

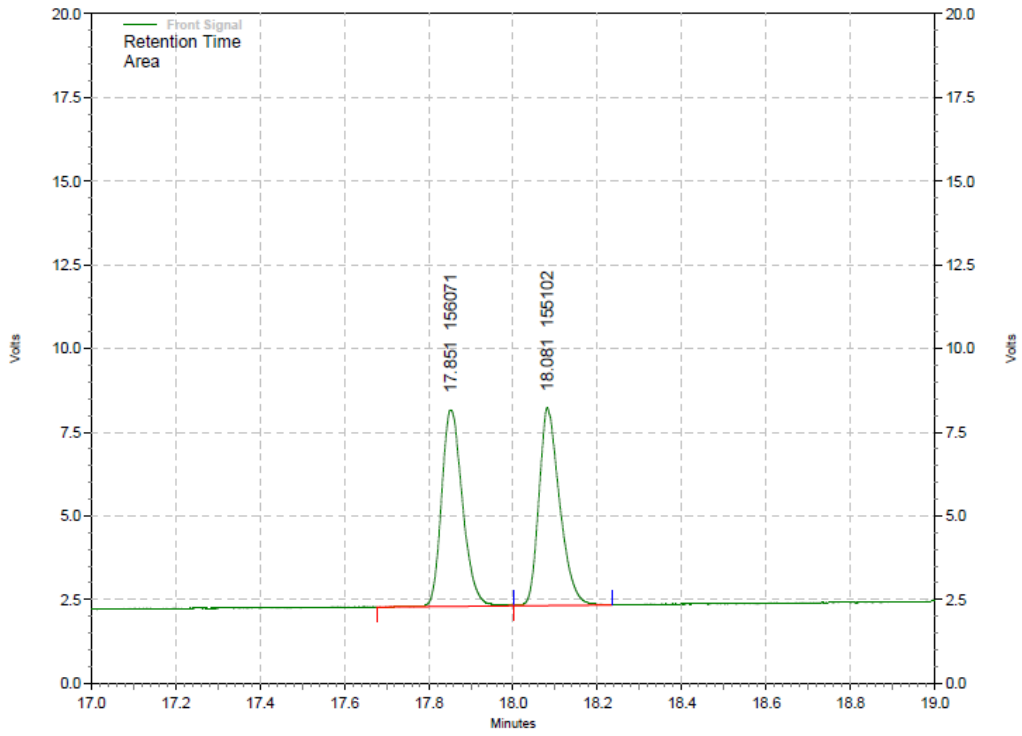

**S21**

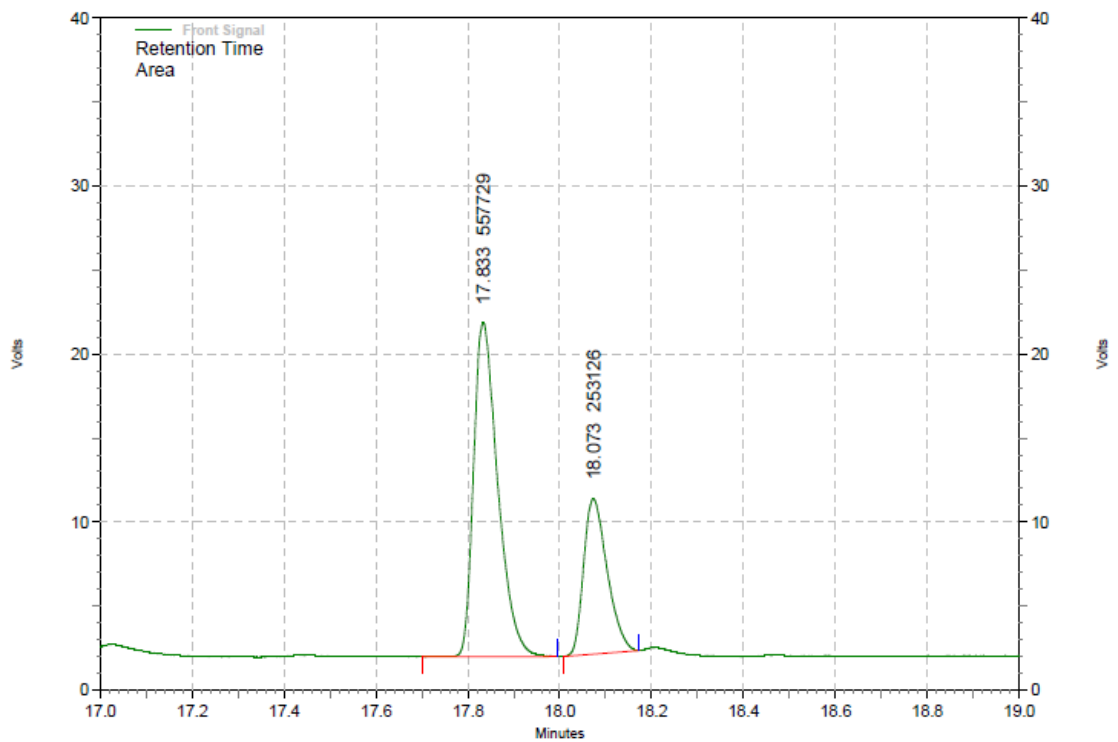

## References

1. Font, D.; Canta, M.; Milan, M.; Cussó, O.; Ribas, X.; Klein Gebbink, R. J. M.; Costas, M., Readily Accessible Bulky Iron Catalysts exhibiting Site Selectivity in the Oxidation of Steroidal Substrates. *Angew. Chem. Int. Ed.* **2016**, *55*, 5776-5779
2. Gormisky, P. E.; White, M. C., Catalyst-Controlled Aliphatic C–H Oxidations with a Predictive Model for Site-Selectivity. *J. Am. Chem. Soc.* **2013**, *135*, 14052-14055
3. Etxebarria, J.; Degenbeck, H.; Felten, A. S.; Serres, S.; Nieto, N.; Vidal-Ferran, A., Supramolecular-Directed Chiral Induction in Biaryl Derivatives. *J. Org. Chem.* **2009**, *74*, 8794-8797
4. Costas, M.; Tipton, A. K.; Chen, K.; Jo, D.-H.; Que Jr., L., Modeling Rieske Dioxygenases. The First Example of Iron-Catalyzed Asymmetric *cis*-Dihydroxylation of Olefins. *J. Am. Chem. Soc.* **2001**, *123*, 6722-6723
5. Chen, M. S.; White, M. C., A Predictably Selective Aliphatic C-H Oxidation Reaction for Complex Molecule Synthesis. *Science* **2007**, *318*, 783-787
6. Murphy, A.; Dubois, G.; Stack, T. D. P., Efficient Epoxidation of Electron-Deficient Olefins with a Cationic Manganese Complex. *J. Am. Chem. Soc.* **2003**, *125*, 5250-5251
7. Ottenbacher, R. V.; Bryliakov, K. P.; Talsi, E. P., Non-Heme Manganese Complexes Catalyzed Asymmetric Epoxidation of Olefins by Peracetic Acid and Hydrogen Peroxide. *Adv. Synth. Catal.* **2011**, *353*, 885-889
8. Cussó, O.; Garcia-Bosch, I.; Font, D.; Ribas, X.; Lloret-Fillol, J.; Costas, M., Highly Stereoselective Epoxidation with H<sub>2</sub>O<sub>2</sub> Catalyzed by Electron-Rich Aminopyridine Manganese Catalysts. *Org. Lett.* **2013**, *15*, 6158-6161
9. Wang, X.; Miao, C.; Wang, S.; Xia, C.; Sun, W., Bioinspired Manganese and Iron Complexes with Tetradentate N Ligands for the Asymmetric Epoxidation of Olefins. *ChemCatChem* **2013**, *5*, 2489–2494
10. Lohr, T. L.; Li, Z.; Assary, R. S.; Curtiss, L. A.; Marks, T. J., Thermodynamically Leveraged Tandem Catalysis for Ester RC(O)O–R' Bond Hydrogenolysis. Scope and Mechanism. *ACS Catal.* **2015**, *5*, 3675-3679
11. Kitching, W.; Olszowy, H. A.; Drew, G. M.; Adcock, W., Conformational preference of the trimethylsilyl group. *J. Org. Chem.* **1982**, *47*, 5153-5156
12. Bechara, W. S.; Khazhieva, I. S.; Rodriguez, E.; Charette, A. B., One-Pot Synthesis of 3,4,5-Trisubstituted 1,2,4-Triazoles via the Addition of Hydrazides to Activated Secondary Amides. *Org. Lett.* **2015**, *17*, 1184-1187
13. Schmidt, V. A.; Quinn, R. K.; Brusoe, A. T.; Alexanian, E. J., Site-Selective Aliphatic C–H Bromination Using *N*-Bromoamides and Visible Light. *J. Am. Chem. Soc.* **2014**, *136*, 14389-14392
14. Makhseed, S.; Ibrahim, F.; Samuel, J., Phthalimide based polymers of intrinsic microporosity. *Polymer* **2012**, *53*, 2964-2972
15. Nirogi, R. V. S.; Konda, J. B.; Kambhampati, R.; Shinde, A.; Bandyala, T. R.; Gudla, P.; Kandukuri, K. K.; Jayarajan, P.; Kandikere, V.; Dubey, P. K., *N,N*-Dimethyl-[9-(arylsulfonyl)-2,3,4,9-tetrahydro-1H-carbazol-3-yl]amines as novel, potent and selective 5-HT<sub>6</sub> receptor antagonists. *Bioorg. Med. Chem. Lett.* **2012**, *22*, 6980-6985
16. Chen, M. S.; White, M. C., Combined Effects on Selectivity in Fe-Catalyzed Methylene Oxidation. *Science* **2010**, *327*, 566-571
17. Sugi, M.; Sakuma, D.; Togo, H., Zinc- and Indium-Mediated Ring-Expansion Reaction of  $\alpha$ -Halomethyl Cyclic  $\beta$ -Keto Esters in Aqueous Alcohol. *J. Org. Chem.* **2003**, *68*, 7629-7633
18. Cregge, R. J.; Lentz, N. L.; Sabol, J. S., Conformationally restricted leukotriene antagonists. Synthesis of chiral 4-hydroxy-4-alkylcyclohexanecarboxylic acids as leukotriene D<sub>4</sub> analogs. *J. Org. Chem.* **1991**, *56*, 1758-1763
19. Gao, M.; Wang, M.; Mock, B. H.; Miller, K. D.; Sledge, G. W.; Hutchins, G. D.; Zheng, Q.-H., Synthesis of new carbon-11 labeled cyclofenil derivatives for PET imaging of breast cancer estrogen receptors. *Appl. Rad. Isot.* **2008**, *66*, 523-529

20. Li, X.; Che, X.; Chen, G.-H.; Zhang, J.; Yan, J.-L.; Zhang, Y.-F.; Zhang, L.-S.; Hsu, C.-P.; Gao, Y. Q.; Shi, Z.-J., Direct Oxidation of Aliphatic C–H Bonds in Amino-Containing Molecules under Transition-Metal-Free Conditions. *Org. Lett.* **2016**, *18*, 1234-1237
